# Supplementary material for: Redox-triggered cascade dearomative cyclizations enabled by hexafluoroisopropanol
Source: PubMed Central journal article supplement — Chem Sci. 2018 Sep 13;9(43):8253–9. doi: 10.1039/c8sc03339k (PMC6240893; doi:10.1039/c8sc03339k), 2018-09-13

# Supporting Information

## Redox-Triggered Cascade Dearomative Cyclizations Enabled by Hexafluoroisopropanol

Shuai-Shuai Li,<sup>a</sup> Xintong Lv,<sup>a</sup> Didi Ren,<sup>a</sup> Chang-Lun Shao,<sup>b</sup> Qing Liu,<sup>c</sup> Jian Xiao\*<sup>a</sup>

<sup>a</sup> College of Chemistry and Pharmaceutical Sciences, Qingdao Agricultural University, Qingdao, 266109, China.  
E-mail: chemjianxiao@163.com

<sup>b</sup> Key Laboratory of Marine Drugs, The Ministry of Education of China, School of Medicine and Pharmacy, Ocean University of China, Qingdao 266003, China

<sup>c</sup> College of Chemical and Environmental Engineering, Shandong University of Science and Technology, Qingdao 266590, China

### Table of Contents

|                                                                    |            |
|--------------------------------------------------------------------|------------|
| <b>1. General Information.....</b>                                 | <b>S2</b>  |
| <b>2. General Procedure.....</b>                                   | <b>S2</b>  |
| <b>3. Mechanistic Experiments.....</b>                             | <b>S4</b>  |
| <b>4. Characterization of Starting Materials and Products.....</b> | <b>S7</b>  |
| <b>5. Crystal Structures and Data .....</b>                        | <b>S25</b> |
| <b>6. <sup>1</sup>H and <sup>13</sup>C NMR Spectra.....</b>        | <b>S26</b> |

## 1. General Information

Unless otherwise noted, all reagents and solvents were purchased from the commercial sources and used as received. Thin layer chromatography (TLC) was used to monitor the reaction on Merck 60 F254 precoated silica gel plate (0.2 mm thickness). TLC spots were visualized by UV-light irradiation on Spectroline Model ENF-24061/F 254 nm. The products were purified by flash column chromatography (200-300 mesh silica gel) eluted with the gradient of petroleum ether and ethyl acetate. Proton nuclear magnetic resonance spectra ( $^1\text{H}$  NMR) were recorded on a Bruker 500 MHz NMR spectrometer ( $\text{CDCl}_3$  or  $\text{DMSO-d}_6$  solvent). The chemical shifts were reported in parts per million (ppm), downfield from  $\text{SiMe}_4$  ( $\delta$  0.0) and relative to the signal of chloroform-d ( $\delta$  7.26, singlet) or dimethyl sulfoxide-d<sub>6</sub> ( $\delta$  2.54, singlet). Multiplicities were afforded as: s (singlet); d (doublet); t (triplet); q (quartet); dd (doublets of doublet) or m (multiplets). The number of protons for a given resonance is indicated by nH. Coupling constants were reported as a  $J$  value in Hz. Carbon nuclear magnetic resonance spectra ( $^{13}\text{C}$  NMR) was referenced to the appropriate residual solvent peak. High resolution mass spectral analysis (HRMS) was performed on Waters XEVO G2 Q-TOF. All substituted 2-fluorobenzaldehydes, phenols, and naphthols were purchased from adamas-beta. All *o*-aminobenzaldehydes were prepared according to literature.<sup>1</sup>

## 2. General Procedure

### 2.1 General Procedure for the Synthesis of *Ortho*-Spiro Cyclohexaketenes

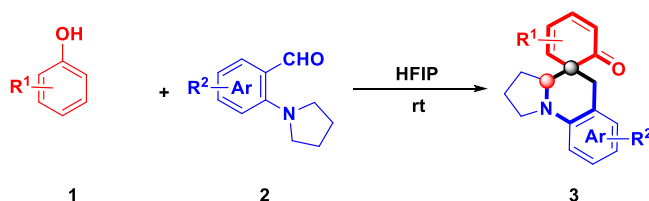

A reaction tube was charged with phenol **1** (0.13 mmol), *o*-aminobenzaldehyde **2** (0.1 mmol), and HFIP (2.0 mL). The mixture was stirred at room temperature under an air atmosphere. Upon completion of the reaction as indicated by TLC analysis, the mixture was concentrated in vacuum and the residue was directly purified by flash column chromatography on silica gel (eluent: ethyl acetate/petroleum ether, 1:20) to afford the desired *ortho*-spiro cyclohexaketene **3**.

### 2.2 General Procedure for the Synthesis of *Para*-Spiro Cyclohexaketenes

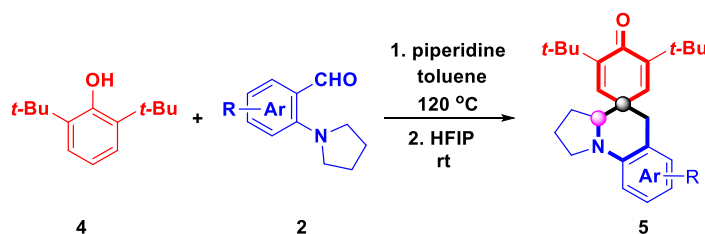

A sealed tube was charged with 2,6-di-*tert*-butylphenol **4** (0.13 mmol), *o*-aminobenzaldehyde **2** (0.1 mmol), piperidine (0.2 mmol), and toluene (1.0 mL). The mixture was stirred at 120 °C under an air atmosphere for 12 h. Then the reaction system cooled to room temperature and HFIP (1.0 mL) was added stirring for another 10 min. The mixture was concentrated in vacuum and the residue was directly purified by flash column chromatography on neutral alumina (eluent: ethyl

acetate/petroleum ether, 1:200) to afford the desired *para*-spiro cyclohexaketene **5**.

### 2.3 Gram-scale synthesis of **3a**

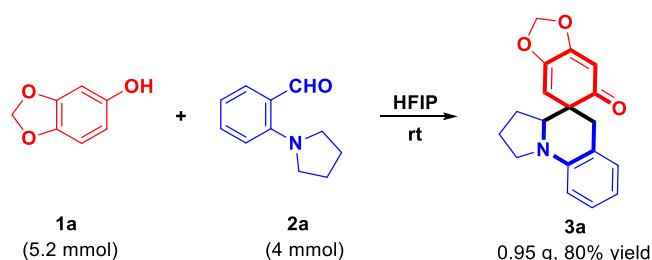

A round-bottomed flask was charged with sesamol **1a** (5.2 mmol), 2-(pyrrolidin-1-yl)benzaldehyde **2a** (4 mmol), and HFIP (80.0 mL). The mixture was stirred at room temperature under an air atmosphere. Upon completion of the reaction as indicated by TLC analysis, the mixture was concentrated in vacuum and the residue was directly purified by flash column chromatography on silica gel (eluent: ethyl acetate/petroleum ether, 1:20) to afford the desired **3a** in 80% yield (0.95 g).

### 2.4 General Procedure for the Partial Hydrogenation of *Ortho*-Spiro Cyclohexaketene

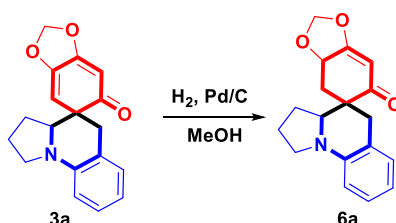

To a solution of **3a** (0.1 mmol) in MeOH (1.0 mL) was added 5% by wt Pd/C (20% by wt relative to **3a**). The tube was equipped with a magnetic stir bar, and the suspension was sealed with a septum under an atmosphere of H<sub>2</sub> supplied via a balloon. Upon completion of the reaction as indicated by TLC analysis, the suspension was filtered through a pad of Celite. The filtrate was concentrated in vacuum. The residue was directly purified by flash column chromatography on silica gel (eluent: ethyl acetate/petroleum ether, 1:100) to afford the partially hydrogenated product **6a** in 60% yield.

### 2.5 General Procedure for the Direct C-H Functionalization of Amines

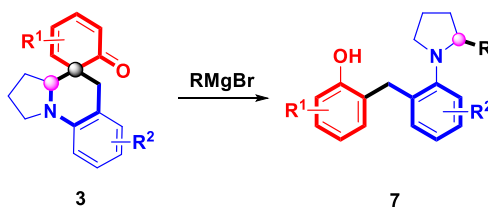

To a cold solution (0 °C) of *ortho*-spiro cyclohexaketene **3** (0.1 mmol) in anhydrous THF (1.0 mL) under an atmosphere of nitrogen was added Grignard reagents (0.4 mmol) dropwise. The mixture was stirred for 10 minutes at 0 °C, then stirred at room temperature. Upon completion, the saturated NaCl (10 mL) was added dropwise to the system at 0 °C and the resulting solution was extracted with EtOAc (10 mL×3). The combined organic extracts were dried with anhydrous

Na<sub>2</sub>SO<sub>4</sub> and concentrated in vacuum. The residue was directly purified by flash column chromatography on silica gel (eluent: ethyl acetate/petroleum ether, 1:10) to afford the desired amines **7**.

### 3. Mechanistic Experiments

#### 3.1 Deuterium labeling experiments

(1)

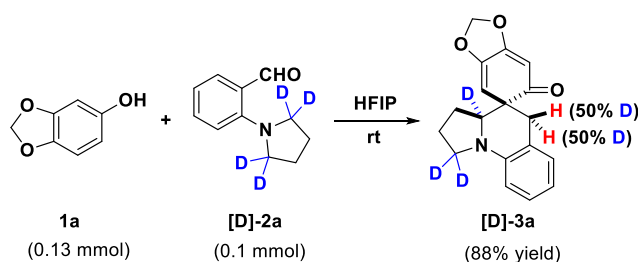

A reaction tube was charged with sesamol **1a** (0.13 mmol), *o*-aminobenzaldehyde **[D]-2a** (0.1 mmol), and HFIP (2.0 mL). The mixture was stirred at room temperature under an air atmosphere. Upon completion of the reaction as indicated by TLC analysis, the mixture was concentrated in vacuum and the residue was directly purified by flash column chromatography on silica gel (eluent: ethyl acetate/petroleum ether, 1:20) to afford the desired *ortho*-spiro cyclohexaketene **[D]-3a** in 88% yield. The deuterated ratio was measured by <sup>1</sup>H NMR.

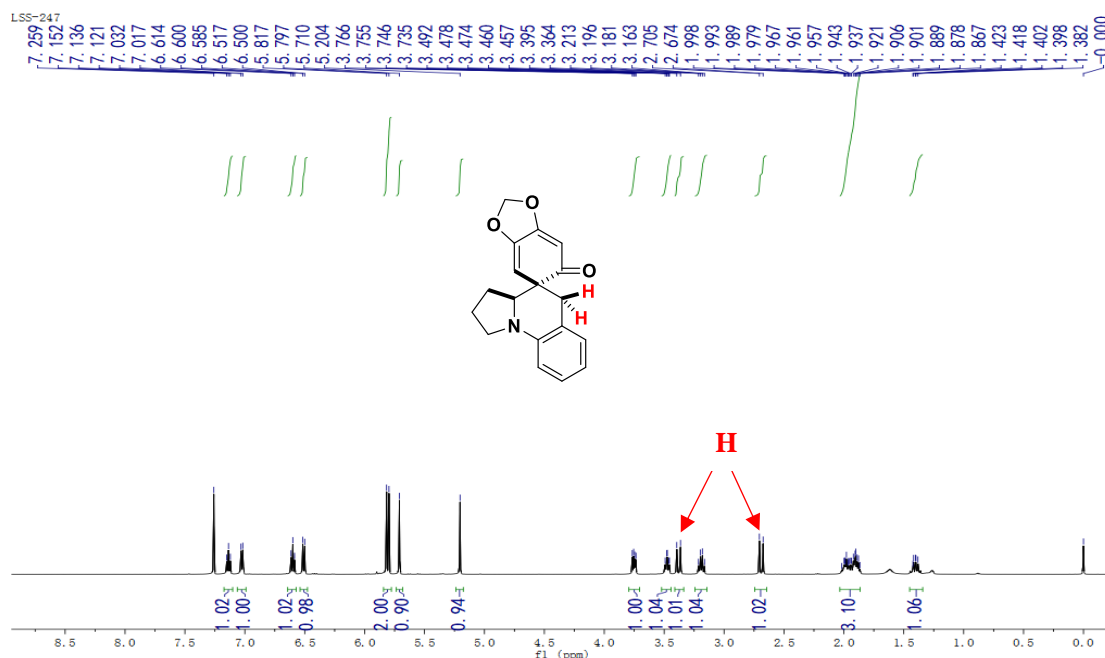

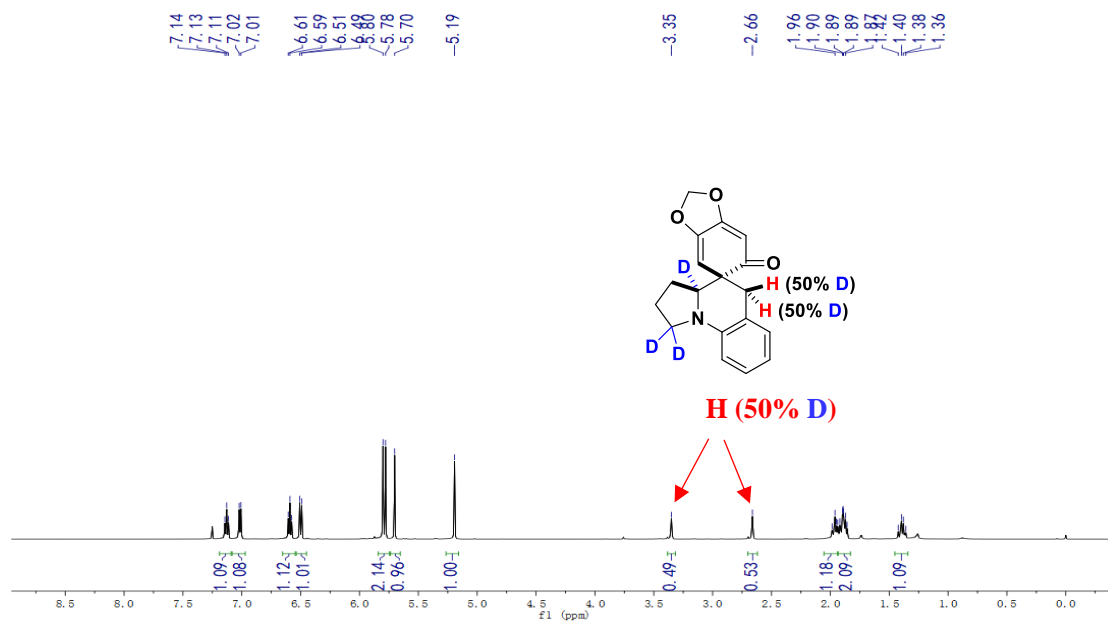

(2)

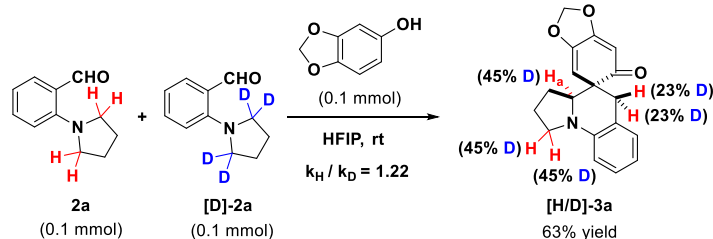

A reaction tube was charged with sesamol **1a** (0.1 mmol), *o*-aminobenzaldehyde **2a** (0.1 mmol), *o*-aminobenzaldehyde **[D]-2a** (0.1 mmol), and HFIP (2.0 mL). The mixture was stirred at room temperature under an air atmosphere for 1 h. Then the mixture was concentrated in vacuum and the residue was directly purified by flash column chromatography on silica gel (eluent: ethyl acetate/petroleum ether, 1:20) to afford the desired *ortho*-spiro cyclohexaketene **3a** and **[D]-3a**. The ratio of **3a** and **[D]-3a** was measured by <sup>1</sup>H NMR.

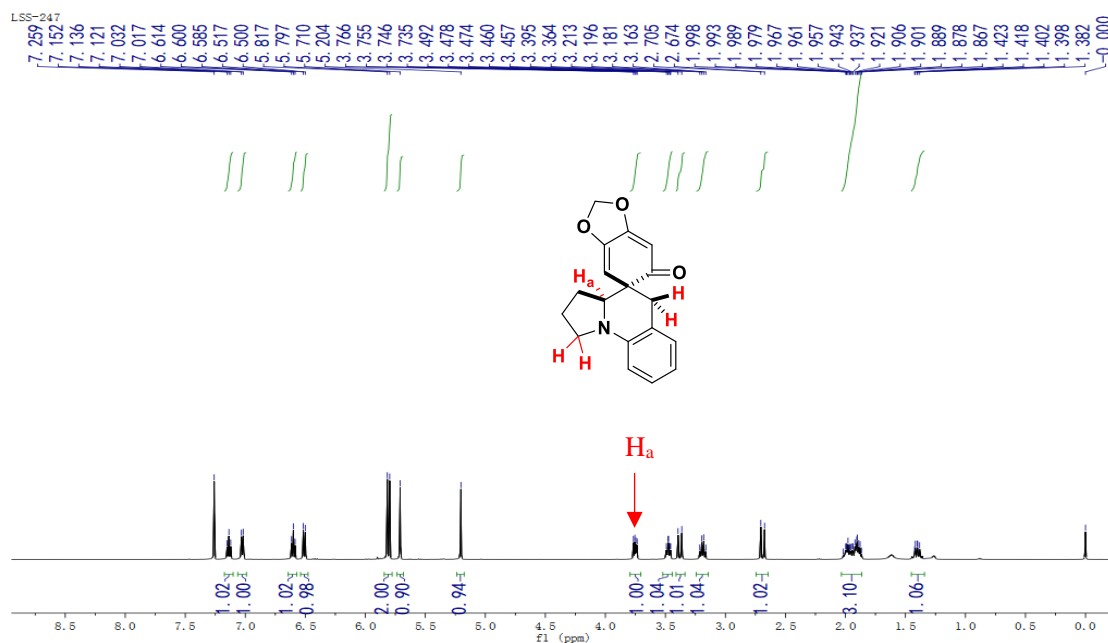

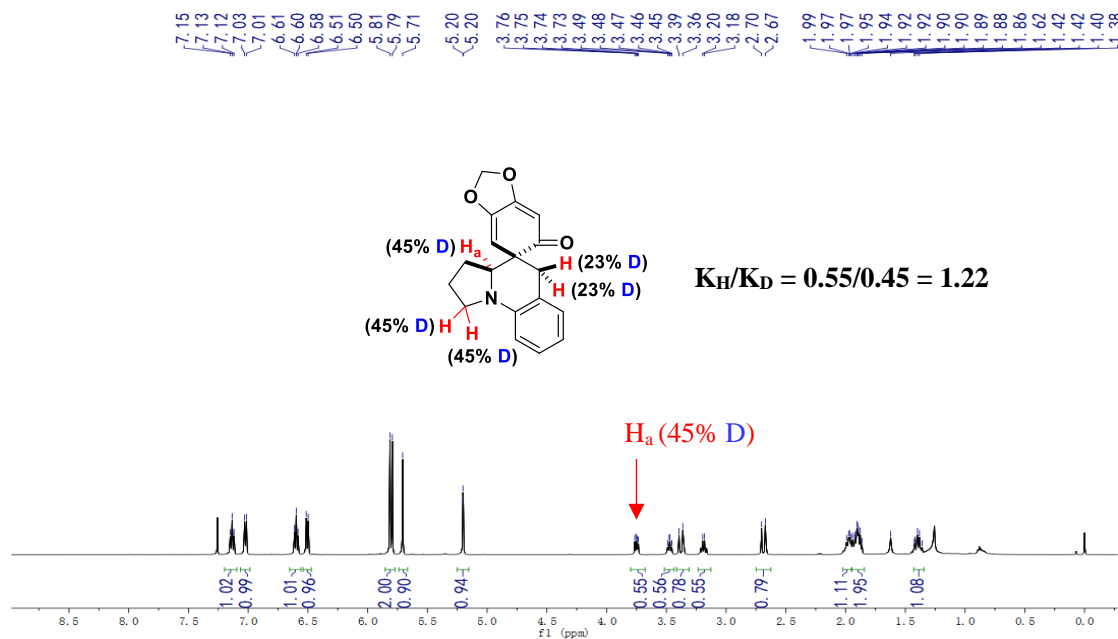

### 3.2 Controlled experiments

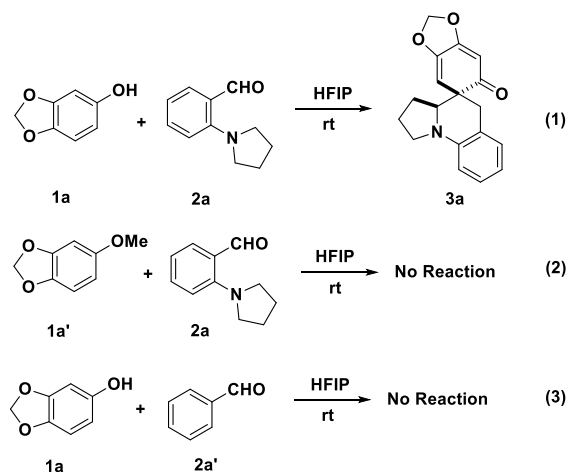

A reaction tube was charged with 5-methoxybenzo[d][1,3]dioxole **1a'** (0.13 mmol), *o*-aminobenzaldehyde **2a** (0.1 mmol), and HFIP (2.0 mL). The mixture was stirred at room temperature under an air atmosphere. The reaction was monitored by TLC. However, the two substrates were intact without any product was observed. This result elucidated the indispensability of the hydrogen bonding interaction between free hydroxyl group and HFIP in facilitating this reaction.

Besides, a reaction tube was charged with sesamol **1a** (0.13 mmol), benzaldehyde **2a'** (0.1 mmol), and HFIP (2.0 mL). The mixture was stirred at room temperature under an air atmosphere. The reaction was monitored by TLC. However, the two substrates were intact without any product was observed. The absence of hydride donor rendered this reaction unproductive, implying the significance of hydride transfer in triggering the whole sequential process.

#### 4. Characterization of Starting Materials and Products

##### 1',2',3',3a'-tetrahydro-5'H,6H-spiro[benzo[d][1,3]dioxole-5,4'-pyrrolo[1,2-a]quinolin]-6-one (3a)

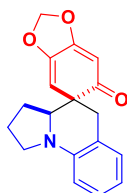

Flash column chromatography on a silica gel (ethyl acetate: petroleum ether, 1:20) afforded the product (26.0 mg, 88% yield) as a yellow solid.

**<sup>1</sup>H NMR** (500 MHz, CDCl<sub>3</sub>) δ 7.14 (t, *J* = 7.7 Hz, 1H), 7.02 (d, *J* = 7.3 Hz, 1H), 6.60 (t, *J* = 7.3 Hz, 1H), 6.51 (d, *J* = 8.1 Hz, 1H), 5.82 (s, 1H), 5.80 (s, 1H), 5.71 (s, 1H), 5.20 (s, 1H), 3.75 (dd, *J* = 9.8, 5.4 Hz, 1H), 3.52 – 3.44 (m, 1H), 3.38 (d, *J* = 15.5 Hz, 1H), 3.19 (dd, *J* = 16.3, 8.7 Hz, 1H), 2.69 (d, *J* = 15.6 Hz, 1H), 1.99 (dd, *J* = 5.8, 3.7 Hz, 1H), 1.96 – 1.85 (m, 2H), 1.46 – 1.35 (m, 1H); **<sup>13</sup>C NMR** (126 MHz, CDCl<sub>3</sub>) δ 201.2, 163.8, 145.18, 142.9, 129.3, 127.6, 119.2, 115.36, 110.4, 104.6, 101.5, 99.3, 65.43, 48.4, 47.11, 41.1, 27.5, 23.5. **HRMS (ESI)**: calcd. for C<sub>18</sub>H<sub>18</sub>NO<sub>3</sub> [M+H]<sup>+</sup>: 296.1287, found: 296.1295.

##### 8'-methyl-1',2',3',3a'-tetrahydro-5'H,6H-spiro[benzo[d][1,3]dioxole-5,4'-pyrrolo[1,2-a]quinolin]-6-one (3b)

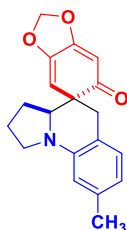

Flash column chromatography on a silica gel (ethyl acetate: petroleum ether, 1:20) afforded the product (21.9 mg, 71% yield) as a yellow solid.

**<sup>1</sup>H NMR** (500 MHz, CDCl<sub>3</sub>) δ 6.91 (d, *J* = 7.5 Hz, 1H), 6.43 (d, *J* = 7.4 Hz, 1H), 6.33 (s, 1H), 5.80 (d, *J* = 9.4 Hz, 2H), 5.70 (s, 1H), 5.22 (s, 1H), 3.73 (dd, *J* = 9.8, 5.4 Hz, 1H), 3.52 – 3.43 (m, 1H), 3.33 (d, *J* = 15.4 Hz, 1H), 3.18 (dd, *J* = 16.2, 8.8 Hz, 1H), 2.66 (d, *J* = 15.5 Hz, 1H), 2.31 (s, 3H), 1.98 (dt, *J* = 10.6, 4.2 Hz, 1H), 1.95 – 1.81 (m, 2H), 1.39 (dd, *J* = 9.9, 8.0 Hz, 1H); **<sup>13</sup>C NMR** (126 MHz, CDCl<sub>3</sub>) δ 201.3, 163.8, 145.1, 142.7, 137.3, 129.1, 116.3, 116.2, 111.1, 104.7, 101.5, 99.3, 65.4, 48.6, 47.1, 40.8, 27.5, 23.5, 21.6. **HRMS (ESI)**: calcd. for C<sub>19</sub>H<sub>20</sub>NO<sub>3</sub> [M+H]<sup>+</sup>: 310.1443, found: 310.1445.

##### 8'-(trifluoromethyl)-1',2',3',3a'-tetrahydro-5'H,6H-spiro[benzo[d][1,3]dioxole-5,4'-pyrrolo[1,2-a]quinolin]-6-one (3c)

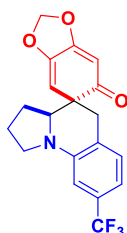

Flash column chromatography on a silica gel (ethyl acetate: petroleum ether, 1:20) afforded the product (30.5 mg, 84% yield) as a yellow solid.

**<sup>1</sup>H NMR** (500 MHz, CDCl<sub>3</sub>) δ 7.09 (d, *J* = 7.6 Hz, 1H), 6.82 (d, *J* = 7.5 Hz, 1H), 6.68 (s, 1H), 5.82 (d, *J* = 10.7 Hz, 2H), 5.73 (s, 1H), 5.11 (s, 1H), 3.76 (dd, *J* = 9.6, 5.1 Hz, 1H), 3.51 (t, *J* = 8.3 Hz, 1H), 3.37 (d, *J* = 15.8 Hz, 1H), 3.21 (d, *J* = 8.0 Hz, 1H), 2.72 (d, *J* = 15.8 Hz, 1H), 2.02 (t, *J* = 6.4 Hz, 1H), 1.99 – 1.84 (m, 2H), 1.51 – 1.37 (m, 1H); **<sup>13</sup>C NMR** (126 MHz, CDCl<sub>3</sub>) δ 200.7, 163.9, 145.5, 142.8, 130.3, 130.0, 129.7, 129.5 (d, *J* = 12.1 Hz), 125.7, 123.5, 122.8, 111.7 (q, *J* = 3.9 Hz), 106.5 (q, *J* = 3.8 Hz), 103.7, 101.6, 99.4, 65.4, 53.5, 47.6, 47.2, 40.8, 27.5, 23.4. **HRMS (ESI)**: calcd. for C<sub>19</sub>H<sub>17</sub>F<sub>3</sub>NO<sub>3</sub> [M+H]<sup>+</sup>: 364.1161, found: 364.1157.

**8'-chloro-1',2',3',3a'-tetrahydro-5'H,6H-spiro[benzo[*d*][1,3]dioxole-5,4'-pyrrolo[1,2-*a*]quinolin]-6-one (3d)**

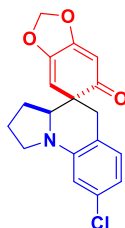

Flash column chromatography on a silica gel (ethyl acetate: petroleum ether, 1:20) afforded the product (27.0 mg, 82% yield) as a red solid.

**<sup>1</sup>H NMR** (500 MHz, CDCl<sub>3</sub>) δ 6.91 (d, *J* = 7.9 Hz, 1H), 6.55 (dd, *J* = 7.9, 1.8 Hz, 1H), 6.46 (d, *J* = 1.7 Hz, 1H), 5.81 (d, *J* = 10.2 Hz, 2H), 5.71 (s, 1H), 5.12 (s, 1H), 3.73 (dd, *J* = 10.0, 5.4 Hz, 1H), 3.50 – 3.39 (m, 1H), 3.29 (d, *J* = 15.5 Hz, 1H), 3.15 (dd, *J* = 16.3, 8.9 Hz, 1H), 2.64 (d, *J* = 15.6 Hz, 1H), 2.07 – 1.97 (m, 1H), 1.92 (ddd, *J* = 15.1, 11.9, 7.9 Hz, 2H), 1.39 (dd, *J* = 10.1, 7.9 Hz, 1H); **<sup>13</sup>C NMR** (126 MHz, CDCl<sub>3</sub>) δ 200.8, 163.9, 145.4, 143.7, 133.01, 130.1, 117.6, 115.1, 110.0, 103.9, 101.6, 99.3, 65.3, 47.9, 47.2, 40.6, 27.5, 23.4. **HRMS (ESI)**: calcd. for C<sub>18</sub>H<sub>17</sub>ClNO<sub>3</sub> [M+H]<sup>+</sup>: 330.0897, found: 330.0899.

**8'-bromo-1',2',3',3a'-tetrahydro-5'H,6H-spiro[benzo[*d*][1,3]dioxole-5,4'-pyrrolo[1,2-*a*]quinolin]-6-one (3e)**

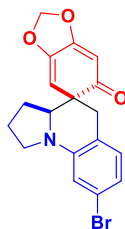

Flash column chromatography on a silica gel (ethyl acetate: petroleum ether, 1:20) afforded the product (31.4 mg, 84% yield) as a yellow solid.

**<sup>1</sup>H NMR** (500 MHz, CDCl<sub>3</sub>) δ 6.86 (d, *J* = 7.9 Hz, 1H), 6.70 (dd, *J* = 7.9, 1.6 Hz, 1H), 6.61 (d, *J* = 1.4 Hz, 1H), 5.82 (d, *J* = 9.6 Hz, 2H), 5.71 (s, 1H), 5.13 (s, 1H), 3.73 (dd, *J* = 10.0, 5.4 Hz, 1H), 3.50 – 3.40 (m, 1H), 3.27 (d, *J* = 15.5 Hz, 1H), 3.15 (dd, *J* = 16.3, 9.0 Hz, 1H), 2.64 (d, *J* = 15.6 Hz, 1H), 2.00 (dd, *J* = 11.4, 4.2 Hz, 1H), 1.92 (ddd, *J* = 15.3, 11.9, 7.9 Hz, 2H), 1.39 (dd, *J* = 10.1, 7.9 Hz, 1H); **<sup>13</sup>C NMR** (126 MHz, CDCl<sub>3</sub>) δ 200.8, 163.9, 145.4, 143.9, 130.4, 121.2, 118.1, 117.9, 112.9, 103.9, 101.6, 99.3, 65.3, 47.9, 47.2, 40.6, 27.5, 23.4. **HRMS (ESI)**: calcd. for C<sub>18</sub>H<sub>17</sub>BrNO<sub>3</sub> [M+H]<sup>+</sup>: 374.0397,



found: 374.0399.

**8'-(4,4,5,5-tetramethyl-1,3-dioxolan-2-yl)-1',2',3',3a'-tetrahydro-5'H,6H-spiro[benzo[*d*][1,3]dioxole-5,4'-pyrrolo[1,2-*a*]quinolin]-6-one (3f)**

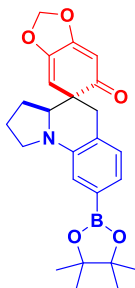

Flash column chromatography on a silica gel (ethyl acetate: petroleum ether, 1:20) afforded the product (29.5 mg, 70% yield) as a yellow solid.

**<sup>1</sup>H NMR** (500 MHz, CDCl<sub>3</sub>) δ 7.11 – 6.99 (m, 2H), 6.95 (s, 1H), 5.80 (d, *J* = 9.6 Hz, 2H), 5.70 (s, 1H), 5.18 (s, 1H), 3.79 – 3.69 (m, 1H), 3.57 (s, 1H), 3.39 (d, *J* = 15.8 Hz, 1H), 3.26 (d, *J* = 7.8 Hz, 1H), 2.70 (d, *J* = 15.8 Hz, 1H), 1.96 (d, *J* = 10.3 Hz, 1H), 1.90 (dd, *J* = 15.9, 10.1 Hz, 2H), 1.40 (d, *J* = 8.9 Hz, 1H), 1.34 (s, 12H); **<sup>13</sup>C NMR** (126 MHz, CDCl<sub>3</sub>) δ 201.2, 163.9, 145.2, 142.4, 128.8, 122.6, 122.0, 116.3, 104.6, 101.5, 99.3, 83.6, 65.6, 48.3, 47.3, 41.3, 27.5, 24.9, 24.8, 23.5. **HRMS (ESI)**: calcd. for C<sub>24</sub>H<sub>29</sub>BNO<sub>5</sub> [M+H]<sup>+</sup>: 422.2139, found: 422.2143.

**methyl(*E*)-3-(6-oxo-1',2',3',3a'-tetrahydro-5'H,6H-spiro[benzo[*d*][1,3]dioxole-5,4'-pyrrolo[1,2-*a*]quinolin]-8'-yl)acrylate (3g)**

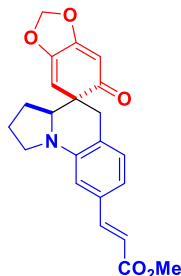

Flash column chromatography on a silica gel (ethyl acetate: petroleum ether, 1:20) afforded the product (35.2 mg, 93% yield) as a brown solid.

**<sup>1</sup>H NMR** (500 MHz, CDCl<sub>3</sub>) δ 7.65 (d, *J* = 16.0 Hz, 1H), 7.03 (d, *J* = 7.6 Hz, 1H), 6.79 (d, *J* = 7.5 Hz, 1H), 6.62 (s, 1H), 6.40 (d, *J* = 16.0 Hz, 1H), 5.82 (d, *J* = 10.3 Hz, 2H), 5.72 (s, 1H), 5.15 (s, 1H), 3.80 (s, 3H), 3.75 (dd, *J* = 9.9, 5.3 Hz, 1H), 3.50 (t, *J* = 7.9 Hz, 1H), 3.37 (d, *J* = 15.9 Hz, 1H), 3.21 (dd, *J* = 16.3, 8.8 Hz, 1H), 2.70 (d, *J* = 16.0 Hz, 1H), 2.09 – 1.99 (m, 1H), 1.99 – 1.81 (m, 2H), 1.48 – 1.34 (m, 1H); **<sup>13</sup>C NMR** (126 MHz, CDCl<sub>3</sub>) δ 200.8, 167.7, 163.9, 145.8, 145.4, 143.1, 133.7, 129.7, 122.2, 116.6, 115.6, 109.3, 104.1, 101.6, 99.3, 65.4, 51.6, 48.1, 47.1, 41.0, 27.5, 23.5. **HRMS (ESI)**: calcd. for C<sub>22</sub>H<sub>22</sub>NO<sub>5</sub> [M+H]<sup>+</sup>: 380.1498, found: 380.1494.

**6-oxo-1',2',3',3a'-tetrahydro-5'H,6H-spiro[benzo[*d*][1,3]dioxole-5,4'-pyrrolo[1,2-*a*]quinoline]-8'-carbonitrile (3h)**

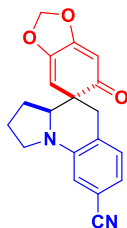

Flash column chromatography on a silica gel (ethyl acetate: petroleum ether, 1:20) afforded the product (24.0 mg, 75% yield) as a yellow solid.

**<sup>1</sup>H NMR** (500 MHz, CDCl<sub>3</sub>) δ 7.07 (d, *J* = 7.6 Hz, 1H), 6.86 (d, *J* = 7.6 Hz, 1H), 6.69 (s, 1H), 5.84 (d, *J* = 10.8 Hz, 2H), 5.73 (s, 1H), 5.05 (s, 1H), 3.74 (dd, *J* = 10.0, 5.3 Hz, 1H), 3.47 (t, *J* = 8.3 Hz, 1H), 3.36 (d, *J* = 16.1 Hz, 1H), 3.17 (dd, *J* = 16.6, 8.7 Hz, 1H), 2.71 (d, *J* = 16.1 Hz, 1H), 2.11 – 2.00 (m, 1H), 2.00 – 1.84 (m, 2H), 1.42 (dd, *J* = 10.0, 8.3 Hz, 1H); **<sup>13</sup>C NMR** (126 MHz, CDCl<sub>3</sub>) δ 200.2, 163.9, 145.7, 143.0, 129.7, 124.6, 119.8, 118.8, 112.7, 111.1, 103.2, 101.7, 99.4, 65.34, 47.3, 47.2, 40.9, 27.4, 23.4. **HRMS (ESI)**: calcd. for C<sub>19</sub>H<sub>17</sub>N<sub>2</sub>O<sub>3</sub> [M+H]<sup>+</sup>: 321.1239, found: 321.1240.

**8'-((4-methoxyphenyl)ethynyl)-1',2',3',3a'-tetrahydro-5'H,6H-spiro[benzo[d][1,3]dioxole-5,4'-pyrrolo[1,2-a]quinolin]-6-one (3i)**

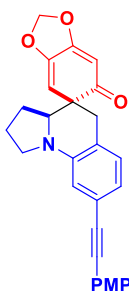

Flash column chromatography on a silica gel (ethyl acetate: petroleum ether, 1:20) afforded the product (34.1 mg, 81% yield) as a yellow solid.

**<sup>1</sup>H NMR** (500 MHz, CDCl<sub>3</sub>) δ 7.47 (d, *J* = 8.6 Hz, 2H), 6.98 (d, *J* = 7.6 Hz, 1H), 6.87 (d, *J* = 8.6 Hz, 2H), 6.77 (d, *J* = 7.6 Hz, 1H), 6.65 (s, 1H), 5.81 (d, *J* = 9.6 Hz, 2H), 5.71 (s, 1H), 5.16 (s, 1H), 3.83 (s, 3H), 3.76 (dd, *J* = 9.8, 5.3 Hz, 1H), 3.49 (t, *J* = 8.0 Hz, 1H), 3.37 (d, *J* = 15.7 Hz, 1H), 3.20 (d, *J* = 7.7 Hz, 1H), 2.69 (d, *J* = 15.8 Hz, 1H), 2.02 (dd, *J* = 13.0, 3.2 Hz, 1H), 1.93 (ddd, *J* = 15.5, 11.4, 7.1 Hz, 2H), 1.47 – 1.34 (m, 1H); **<sup>13</sup>C NMR** (126 MHz, CDCl<sub>3</sub>) δ 201.0, 163.9, 159.5, 145.3, 142.6, 133.0, 129.2, 122.4, 119.7, 118.8, 115.7, 113.9, 112.9, 104.3, 101.5, 99.3, 88.9, 88.1, 65.4, 55.3, 48.2, 47.2, 41.0, 27.5, 23.5. **HRMS (ESI)**: calcd. for C<sub>27</sub>H<sub>24</sub>NO<sub>4</sub> [M+H]<sup>+</sup>: 426.1705, found: 426.1694.

**8'-(4-acetylphenyl)-1',2',3',3a'-tetrahydro-5'H,6H-spiro[benzo[d][1,3]dioxole-5,4'-pyrrolo[1,2-a]quinolin]-6-one (3j)**

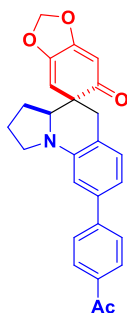

Flash column chromatography on a silica gel (ethyl acetate: petroleum ether, 1:20) afforded the product (34.7 mg, 84% yield) as a yellow solid.

**<sup>1</sup>H NMR** (500 MHz, CDCl<sub>3</sub>) δ 8.02 (d, *J* = 8.2 Hz, 2H), 7.69 (d, *J* = 8.2 Hz, 2H), 7.12 (d, *J* = 7.7 Hz, 1H), 6.86 (d, *J* = 7.6 Hz, 1H), 6.72 (s, 1H), 5.82 (d, *J* = 9.6 Hz, 2H), 5.73 (s, 1H), 5.24 (s, 1H), 3.80 (dd, *J* = 9.8, 5.3 Hz, 1H), 3.57 (t, *J* = 8.0 Hz, 1H), 3.41 (d, *J* = 15.6 Hz, 1H), 3.27 (d, *J* = 7.8 Hz, 1H), 2.75 (d, *J* = 15.7 Hz, 1H), 2.64 (s, 3H), 2.03 (d, *J* = 7.3 Hz, 1H), 1.95 (ddd, *J* = 15.5, 11.5, 7.1 Hz, 2H), 1.50 – 1.37 (m, 1H); **<sup>13</sup>C NMR** (126 MHz, CDCl<sub>3</sub>) δ 201.0, 197.8, 163.9, 146.6, 145.4, 143.2, 139.4, 135.6, 129.8, 128.8, 127.2, 119.6, 114.5, 108.9, 104.3, 101.6, 99.4, 65.5, 48.3, 47.2, 40.8, 27.5, 26.7, 23.5. **HRMS (ESI)**: calcd. for C<sub>26</sub>H<sub>24</sub>NO<sub>4</sub> [M+H]<sup>+</sup>: 414.1705, found: 414.1707.

**8'-(thiophen-2-yl)-1',2',3',3a'-tetrahydro-5'H,6H-spiro[benzo[d][1,3]dioxole-5,4'-pyrrolo[1,2-a]quinolin]-6-one (3k)**

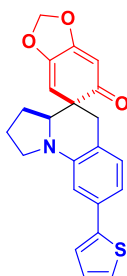

Flash column chromatography on a silica gel (ethyl acetate: petroleum ether, 1:20) afforded the product (33.2 mg, 88% yield) as a brown solid.

**<sup>1</sup>H NMR** (500 MHz, CDCl<sub>3</sub>) δ 7.28 (d, *J* = 3.4 Hz, 1H), 7.24 (d, *J* = 5.0 Hz, 1H), 7.13 – 7.05 (m, 1H), 7.03 (d, *J* = 7.7 Hz, 1H), 6.87 (d, *J* = 7.6 Hz, 1H), 6.72 (s, 1H), 5.81 (d, *J* = 9.7 Hz, 2H), 5.72 (s, 1H), 5.22 (s, 1H), 3.78 (dd, *J* = 9.8, 5.4 Hz, 1H), 3.55 (dd, *J* = 12.1, 4.9 Hz, 1H), 3.37 (d, *J* = 15.6 Hz, 1H), 3.25 (t, *J* = 8.3 Hz, 1H), 2.71 (d, *J* = 15.7 Hz, 1H), 2.01 (dd, *J* = 11.0, 3.9 Hz, 1H), 1.93 (ddd, *J* = 16.1, 11.5, 4.4 Hz, 2H), 1.50 – 1.35 (m, 1H); **<sup>13</sup>C NMR** (126 MHz, CDCl<sub>3</sub>) δ 201.1, 163.9, 145.3, 145.3, 143.1, 133.8, 129.7, 127.8, 124.2, 122.7, 118.9, 113.5, 107.8, 104.4, 101.5, 99.3, 65.5, 48.4, 47.2, 40.9, 27.5, 23.5. **HRMS (ESI)**: calcd. for C<sub>22</sub>H<sub>20</sub>NO<sub>3</sub>S [M+H]<sup>+</sup>: 378.1164, found: 378.1160.

**7'-methoxy-1',2',3',3a'-tetrahydro-5'H,6H-spiro[benzo[d][1,3]dioxole-5,4'-pyrrolo[1,2-a]quinolin]-6-one (3l)**

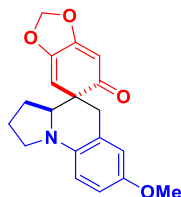

Flash column chromatography on a silica gel (ethyl acetate: petroleum ether, 1:20) afforded the product (26.0 mg, 80% yield) as a yellow solid.

**<sup>1</sup>H NMR** (500 MHz, CDCl<sub>3</sub>) δ 6.75 (d, *J* = 8.6 Hz, 1H), 6.66 (s, 1H), 6.46 (d, *J* = 8.7 Hz, 1H), 5.81 (d, *J* = 10.3 Hz, 2H), 5.70 (s, 1H), 5.21 (s, 1H), 3.74 (s, 3H), 3.69 (dd, *J* = 9.4, 5.3 Hz, 1H), 3.41 (dd, *J* = 16.3, 12.4 Hz, 2H), 3.25 – 3.09 (m, 1H), 2.65 (d, *J* = 15.7 Hz, 1H), 1.92 (ddd, *J* = 20.3, 12.0, 6.5 Hz, 3H), 1.50 – 1.33 (m, 1H); **<sup>13</sup>C NMR** (126 MHz, CDCl<sub>3</sub>) δ 201.2, 163.8, 150.5, 145.2, 137.7, 120.3, 115.5, 113.2, 111.3, 104.7, 101.5, 99.3, 65.7, 55.9, 48.8, 47.6, 41.1, 27.4, 23.5. **HRMS (ESI)**: calcd. for C<sub>19</sub>H<sub>20</sub>NO<sub>4</sub> [M+H]<sup>+</sup>: 326.1392, found: 326.1390.

**7'-chloro-1',2',3',3a'-tetrahydro-5'H,6H-spiro[benzo[*d*][1,3]dioxole-5,4'-pyrrolo[1,2-*a*]quinolin]-6-one (3m)**

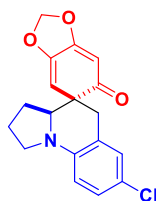

Flash column chromatography on a silica gel (ethyl acetate: petroleum ether, 1:20) afforded the product (25.3 mg, 77% yield) as a yellow solid.

**<sup>1</sup>H NMR** (500 MHz, CDCl<sub>3</sub>) δ 7.07 (d, *J* = 8.5 Hz, 1H), 6.99 (s, 1H), 6.41 (d, *J* = 8.6 Hz, 1H), 5.82 (d, *J* = 8.8 Hz, 2H), 5.71 (s, 1H), 5.12 (s, 1H), 3.72 (dd, *J* = 9.5, 5.1 Hz, 1H), 3.45 (t, *J* = 8.4 Hz, 1H), 3.33 (d, *J* = 15.7 Hz, 1H), 3.15 (dd, *J* = 16.2, 8.3 Hz, 1H), 2.63 (d, *J* = 15.7 Hz, 1H), 2.07 – 1.82 (m, 3H), 1.47 – 1.33 (m, 1H); **<sup>13</sup>C NMR** (126 MHz, CDCl<sub>3</sub>) δ 200.8, 163.9, 145.4, 141.4, 128.8, 127.3, 120.7, 119.9, 111.3, 103.9, 101.6, 99.3, 65.5, 47.9, 47.3, 40.8, 27.5, 23.5. **HRMS (ESI)**: calcd. for C<sub>18</sub>H<sub>16</sub>ClNaNO<sub>3</sub> [M+Na]<sup>+</sup>: 352.0716, found: 352.0714.

**7'-nitro-1',2',3',3a'-tetrahydro-5'H,6H-spiro[benzo[*d*][1,3]dioxole-5,4'-pyrrolo[1,2-*a*]quinolin]-6-one (3n)**

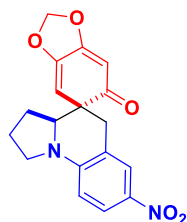

Flash column chromatography on a silica gel (ethyl acetate: petroleum ether, 1:10) afforded the product (23.1 mg, 68% yield) as a yellow solid.

**<sup>1</sup>H NMR** (500 MHz, CDCl<sub>3</sub>) δ 8.07 (dd, *J* = 9.0, 2.4 Hz, 1H), 7.97 (s, 1H), 6.46 (d, *J* = 9.1 Hz, 1H), 5.85 (d, *J* = 6.2 Hz, 2H), 5.75 (s, 1H), 5.03 (s, 1H), 3.87 (dd, *J* = 10.5, 5.2 Hz, 1H), 3.62 (t, *J* = 9.1 Hz, 1H), 3.35 (d, *J* = 15.6 Hz, 1H), 3.29 (dd, *J* = 17.1, 9.7 Hz, 1H), 2.75 (d, *J* = 15.6 Hz, 1H), 2.13 – 2.05 (m, 1H), 1.98 (ddd, *J* = 13.7, 10.2, 6.2 Hz, 2H), 1.45 (dd, *J* = 10.7, 7.4 Hz, 1H); **<sup>13</sup>C NMR** (126 MHz, CDCl<sub>3</sub>) δ 199.8, 163.9, 147.7, 145.9, 136.6, 125.6, 125.1, 118.8, 109.1, 102.6, 101.8, 99.4, 65.6, 47.6, 47.3, 40.7, 27.5, 23.2. **HRMS (ESI)**: calcd. for C<sub>18</sub>H<sub>17</sub>N<sub>2</sub>O<sub>5</sub> [M+H]<sup>+</sup>: 341.1137, found: 341.1139.

**6'-fluoro-1',2',3',3a'-tetrahydro-5'H,6H-spiro[benzo[*d*][1,3]dioxole-5,4'-pyrrolo[1,2-*a*]quinolin]-6-one (3o)**

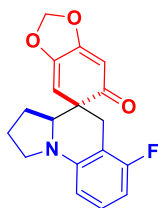

Flash column chromatography on a silica gel (ethyl acetate: petroleum ether, 1:20) afforded the product (30.7 mg, 98% yield) as a yellow solid.

**<sup>1</sup>H NMR** (500 MHz, CDCl<sub>3</sub>) δ 7.06 (dd, *J* = 15.0, 7.9 Hz, 1H), 6.35 (t, *J* = 8.7 Hz, 1H), 6.29 (d, *J* = 8.2 Hz, 1H), 5.81 (d, *J* = 9.5 Hz, 2H), 5.72 (s, 1H), 5.16 (s, 1H), 3.70 (dd, *J* = 9.9, 5.3 Hz, 1H), 3.47 (td, *J* = 9.1, 2.2 Hz, 1H), 3.20 (dd, *J* = 16.3, 8.7 Hz, 1H), 3.07 (d, *J* = 16.1 Hz, 1H), 2.94 (d, *J* = 16.0 Hz, 1H), 2.06 – 1.96 (m, 1H), 1.96 – 1.86 (m, 2H), 1.41 (dd, *J* = 9.6, 8.2 Hz, 1H); **<sup>13</sup>C NMR** (126 MHz, CDCl<sub>3</sub>) δ 200.9, 163.9, 162.5, 160.6, 145.4, 144.3 (d, *J* = 7.7 Hz), 127.9 (d, *J* = 10.8 Hz), 106.4, 104.1, 102.2, 102.1, 101.6, 99.4, 64.8, 47.5 (d, *J* = 11.8 Hz), 33.5 (d, *J* = 4.3 Hz), 27.5, 23.4. **HRMS (ESI)**: calcd. for C<sub>18</sub>H<sub>17</sub>FNO<sub>3</sub> [M+H]<sup>+</sup>: 314.1192, found: 314.1193.

**6'-chloro-1',2',3',3a'-tetrahydro-5'H,6H-spiro[benzo[d][1,3]dioxole-5,4'-pyrrolo[1,2-a]quinolin]-6-one (3p)**

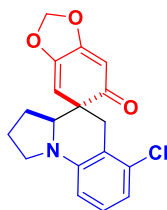

Flash column chromatography on a silica gel (ethyl acetate: petroleum ether, 1:20) afforded the product (27.0 mg, 82% yield) as a yellow solid.

**<sup>1</sup>H NMR** (500 MHz, CDCl<sub>3</sub>) δ 7.04 (t, *J* = 8.0 Hz, 1H), 6.67 (d, *J* = 7.9 Hz, 1H), 6.41 (d, *J* = 8.2 Hz, 1H), 5.82 (d, *J* = 7.8 Hz, 2H), 5.73 (s, 1H), 5.16 (s, 1H), 3.70 (dd, *J* = 9.8, 5.3 Hz, 1H), 3.46 (td, *J* = 8.6, 2.0 Hz, 1H), 3.21 (dd, *J* = 16.3, 8.5 Hz, 1H), 3.15 (d, *J* = 16.4 Hz, 1H), 3.06 (d, *J* = 16.4 Hz, 1H), 2.07 – 1.97 (m, 1H), 1.97 – 1.84 (m, 2H), 1.42 (dd, *J* = 9.7, 8.2 Hz, 1H); **<sup>13</sup>C NMR** (126 MHz, CDCl<sub>3</sub>) δ 200.8, 163.9, 145.4, 144.1, 134.7, 127.8, 117.1, 116.2, 108.9, 104.2, 101.6, 99.4, 64.8, 48.3, 47.4, 38.4, 27.5, 23.5. **HRMS (ESI)**: calcd. for C<sub>18</sub>H<sub>17</sub>ClNO<sub>3</sub> [M+H]<sup>+</sup>: 330.0897, found: 330.0893.

**6'-bromo-1',2',3',3a'-tetrahydro-5'H,6H-spiro[benzo[d][1,3]dioxole-5,4'-pyrrolo[1,2-a]quinolin]-6-one (3q)**

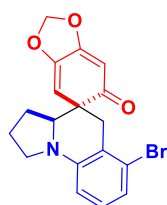

Flash column chromatography on a silica gel (ethyl acetate: petroleum ether, 1:20) afforded the product (33.9 mg, 91% yield) as a yellow solid.

**<sup>1</sup>H NMR** (500 MHz, CDCl<sub>3</sub>) δ 6.97 (t, *J* = 8.0 Hz, 1H), 6.86 (d, *J* = 7.9 Hz, 1H), 6.45 (d, *J* = 8.1 Hz, 1H), 5.83 (d, *J* = 6.8 Hz, 2H), 5.73 (s, 1H), 5.17 (s, 1H), 3.70 (dd, *J* = 9.7, 5.3 Hz, 1H), 3.45 (t, *J* = 8.9

Hz, 1H), 3.21 (d,  $J = 8.0$  Hz, 1H), 3.16 (d,  $J = 16.5$  Hz, 1H), 3.03 (d,  $J = 16.4$  Hz, 1H), 2.07 – 1.98 (m, 1H), 1.97 – 1.85 (m, 2H), 1.49 – 1.36 (m, 1H);  $^{13}\text{C}$  NMR (126 MHz,  $\text{CDCl}_3$ )  $\delta$  200.7, 164.0, 145.4, 144.2, 128.3, 125.65, 119.5, 118.7, 109.5, 104.1, 101.6, 99.4, 64.9, 48.5, 47.3, 41.4, 27.4, 23.6. HRMS (ESI): calcd. for  $\text{C}_{18}\text{H}_{17}\text{BrNO}_3$   $[\text{M}+\text{H}]^+$ : 374.0392, found: 374.0393.

**6a',6b',7',8',9',10',10a',11'-octahydro-5'H,6H-spiro[benzo[d][1,3]dioxole-5,6'-isoindolo[2,1-a]quinolin]-6-one (3r)**

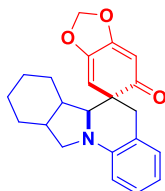

Flash column chromatography on a silica gel (ethyl acetate: petroleum ether, 1:20) afforded the product (18.1 mg, 52% yield, 1.7:1 dr) as a yellow solid.

$^1\text{H}$  NMR (500 MHz,  $\text{CDCl}_3$ )  $\delta$  7.13 (t,  $J = 7.6$  Hz, 1H), 6.99 (t,  $J = 7.3$  Hz, 1H), 6.56 (dt,  $J = 14.4$ , 7.3 Hz, 1H), 6.46 (d,  $J = 8.1$  Hz, 1H), 5.84 (s, 1H), 5.79 (s, 1H), 5.71 (s, 1H), 5.16 (s, 1H), 3.68 (d,  $J = 8.8$  Hz, 1H), 3.58 (t,  $J = 7.9$  Hz, 1H), 3.35 (d,  $J = 15.4$  Hz, 1H), 3.27 (d,  $J = 15.3$  Hz, 1H), 3.22 (d,  $J = 3.3$  Hz, 1H), 2.4 (t,  $J = 7.9$  Hz, 1H), 2.67 (d,  $J = 20$  Hz, 1H), 1.99 – 1.88 (m, 1H), 1.80 – 1.64 (m, 2H), 1.58 (d,  $J = 4.7$  Hz, 1H), 1.48 (dt,  $J = 7.9$ , 4.1 Hz, 1H), 1.38 (dd,  $J = 23.2$ , 10.9 Hz, 1H), 1.25 (t,  $J = 11.9$  Hz, 1H), 1.18 – 1.09 (m, 1H);  $^{13}\text{C}$  NMR (126 MHz,  $\text{CDCl}_3$ )  $\delta$  201.9, 201.5, 163.94, 163.7, 151.3, 148.2, 144.8, 144.6, 143.3, 142.7, 141.2, 129.0, 127.7, 127.6, 118.8, 118.6, 114.9, 114.6, 110.0, 109.3, 108.1, 106.7, 105.4, 105.1, 101.5, 101.5, 101.1, 99.3, 99.1, 98.3, 70.3, 65.5, 53.8, 51.8, 47.8, 47.6, 43.2, 42.4, 42.4, 40.8, 37.3, 29.6, 28.9, 28.6, 26.7, 25.7, 25.2, 21.6. HRMS (ESI): calcd. for  $\text{C}_{22}\text{H}_{24}\text{NO}_3$   $[\text{M}+\text{H}]^+$ : 350.1756, found: 350.1754.

**7',11b'-dihydro-6H,6'H,13'H-spiro[benzo[d][1,3]dioxole-5,12'-isoquinolino[2,1-a]quinolin]-6-one (3s)**

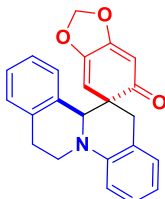

Flash column chromatography on a silica gel (ethyl acetate: petroleum ether, 1:20) afforded the product (25.0 mg, 70% yield) as a reddish brown solid.

$^1\text{H}$  NMR (500 MHz,  $\text{CDCl}_3$ )  $\delta$  7.16 (dd,  $J = 17.0$ , 8.9 Hz, 2H), 7.07 (s, 4H), 6.79 (d,  $J = 7.9$  Hz, 1H), 6.71 (t,  $J = 6.6$  Hz, 1H), 5.65 (s, 1H), 5.57 (s, 1H), 5.54 (s, 2H), 4.88 (s, 1H), 3.94 (d,  $J = 9.8$  Hz, 1H), 3.71 (d,  $J = 16.1$  Hz, 1H), 3.32 (t,  $J = 11.1$  Hz, 1H), 3.03 (t,  $J = 11.1$  Hz, 1H), 2.84 – 2.65 (m, 2H);  $^{13}\text{C}$  NMR (126 MHz,  $\text{CDCl}_3$ )  $\delta$  201.7, 163.5, 144.9, 144.1, 136.5, 133.9, 129.4, 128.3, 127.9, 127.2, 126.9, 125.9, 120.7, 116.8, 112.2, 105.4, 101.2, 99.6, 65.0, 53.6, 44.4, 40.9, 30.0. HRMS (ESI): calcd. for  $\text{C}_{23}\text{H}_{20}\text{NO}_3$   $[\text{M}+\text{H}]^+$ : 358.1443, found: 358.1441.

**1',2',3',3a'-tetrahydro-5'H,6H-spiro[benzo[d][1,3]dioxole-5,4'-benzo[g]pyrrolo[1,2-a][1,8]naphthyridin]-6-one (3t)**

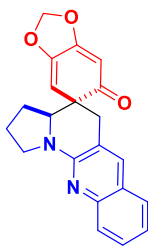

Flash column chromatography on a silica gel (ethyl acetate: petroleum ether, 1:20) afforded the product (30.1 mg, 87% yield) as a reddish brown solid.

**<sup>1</sup>H NMR** (500 MHz, CDCl<sub>3</sub>) δ 7.71 (d, *J* = 8.4 Hz, 1H), 7.60 (s, 1H), 7.56 – 7.46 (m, 2H), 7.17 (t, *J* = 7.4 Hz, 1H), 5.84 (s, 1H), 5.81 (s, 1H), 5.75 (s, 1H), 5.19 (s, 1H), 4.00 (dd, *J* = 10.2, 5.1 Hz, 1H), 3.96 (t, *J* = 9.5 Hz, 1H), 3.64 (dd, *J* = 13.9, 5.1 Hz, 1H), 3.47 (d, *J* = 15.7 Hz, 1H), 2.84 (d, *J* = 15.5 Hz, 1H), 2.03 – 1.98 (m, 1H), 1.94 (dd, *J* = 16.8, 8.4 Hz, 2H), 1.52 – 1.43 (m, 1H); **<sup>13</sup>C NMR** (126 MHz, CDCl<sub>3</sub>) δ 200.1, 163.9, 152.4, 145.7, 135.1, 129.0, 127.0, 125.8, 122.9, 121.8, 118.0, 103.2, 101.7, 99.3, 65.4, 48.5, 46.7, 40.9, 28.1, 23.2. **HRMS (ESI)**: calcd. for C<sub>21</sub>H<sub>19</sub>N<sub>2</sub>O<sub>3</sub> [M+H]<sup>+</sup>: 347.1396, found: 347.1399.

**1',2',3',12a'-tetrahydro-6*H*,11'*H*-spiro[benzo[*d*][1,3]dioxole-5,12'-naphtho[1,8-*ef*]pyrrolo[1,2-*a*]azepin]-6-one (3u)**

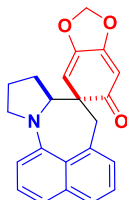

Flash column chromatography on a silica gel (ethyl acetate: petroleum ether, 1:20) afforded the product (19.3 mg, 56% yield, 1.7:1 dr) as a yellow solid.

**<sup>1</sup>H NMR** (500 MHz, CDCl<sub>3</sub>) δ 7.62 (d, *J* = 7.9 Hz, 1H), 7.29 (dd, *J* = 13.4, 6.8 Hz, 3H), 6.93 (d, *J* = 6.8 Hz, 1H), 6.72 (d, *J* = 6.9 Hz, 1H), 5.89 (s, 1H), 5.87 (s, 1H), 5.85 (s, 1H), 5.65 (s, 1H), 4.17 (d, *J* = 9.4 Hz, 1H), 3.57-3.54 (m, 1H), 3.45 (d, *J* = 13.7 Hz, 1H), 3.10 (dd, *J* = 17.2, 9.3 Hz, 1H), 2.55 (d, *J* = 14 Hz, 1H), 2.10-2.07 (m, 1H), 2.03 – 1.96 (m, 1H), 1.80 – 1.74 (m, 1H), 1.39 (dd, *J* = 12.7, 6.9 Hz, 1H); **<sup>13</sup>C NMR** (126 MHz, CDCl<sub>3</sub>) δ 200.7, 199.5, 163.4, 162.7, 150.3, 149.9, 144.3, 143.9, 135.5, 134.7, 133.6, 127.1, 126.9, 126.8, 126.6, 126.5, 126.1, 126.0, 125.5, 125.4, 125.1, 119.4, 118.7, 107.6, 107.5, 107.5, 107.2, 101.5, 99.9, 98.3, 72.5, 71.1, 60.0, 58.5, 51.3, 51.1, 44.5, 43.7, 28.5, 28.1, 25.4, 23.7. **HRMS (ESI)**: calcd. for C<sub>22</sub>H<sub>20</sub>NO<sub>3</sub> [M+H]<sup>+</sup>: 346.1443, found: 346.1446.

**4-methoxy-1',2',3',3a'-tetrahydro-5'*H*-spiro[cyclohexane-1,4'-pyrrolo[1,2-*a*]quinoline]-2,4-dien-6-one (3v)**

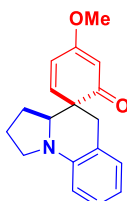

Flash column chromatography on a silica gel (ethyl acetate: petroleum ether, 1:15) afforded the product (14.9 mg, 53% yield) as a yellow solid.

**<sup>1</sup>H NMR** (500 MHz, CDCl<sub>3</sub>) δ 7.15 (t, *J* = 7.7 Hz, 1H), 7.03 (d, *J* = 7.4 Hz, 1H), 6.63 (t, *J* = 7.4 Hz, 1H), 6.52 (d, *J* = 8.1 Hz, 1H), 6.44 (d, *J* = 10.2 Hz, 1H), 6.24 (d, *J* = 10.2 Hz, 1H), 5.69 (s, 1H), 3.90

(dd,  $J = 9.5, 6.1$  Hz, 1H), 3.78 (s, 3H), 3.58 (d,  $J = 15.7$  Hz, 1H), 3.47 (t,  $J = 8.1$  Hz, 1H), 3.25 (q,  $J = 8.2$  Hz, 1H), 2.65 (d,  $J = 15.8$  Hz, 1H), 2.05 – 1.95 (m, 1H), 1.96 – 1.88 (m, 1H), 1.84 (dt,  $J = 12.7, 6.5$  Hz, 1H), 1.47 – 1.34 (m, 1H);  $^{13}\text{C}$  NMR (126 MHz,  $\text{CDCl}_3$ )  $\delta$  187.9, 177.4, 145.1, 142.94, 129.2, 127.8, 118.5, 115.8, 110.8, 103.5, 62.5, 56.1, 47.3, 42.6, 38.2, 27.6, 23.2. **HRMS (ESI):** calcd. for  $\text{C}_{18}\text{H}_{20}\text{NO}_2$   $[\text{M}+\text{H}]^+$ : 282.1494, found: 282.1499.

**3,4-dimethoxy-1',2',3',3a'-tetrahydro-5'H-spiro[cyclohexane-1,4'-pyrrolo[1,2-a]quinoline]-2,4-dien-6-one (3w)**

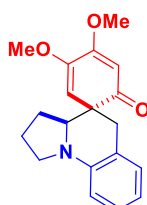

Flash column chromatography on a silica gel (ethyl acetate: petroleum ether, 1:6) afforded the product (20.8 mg, 67% yield) as a yellow solid.

$^1\text{H}$  NMR (500 MHz,  $\text{CDCl}_3$ )  $\delta$  7.14 (t,  $J = 7.7$  Hz, 1H), 7.05 (d,  $J = 7.4$  Hz, 1H), 6.61 (t,  $J = 7.3$  Hz, 1H), 6.53 (d,  $J = 8.1$  Hz, 1H), 5.58 (s, 1H), 4.92 (s, 1H), 3.85 (s, 3H), 3.72 (dd,  $J = 9.6, 5.5$  Hz, 1H), 3.50 (s, 3H), 3.47 (dd,  $J = 8.6, 2.7$  Hz, 1H), 3.40 (d,  $J = 15.6$  Hz, 1H), 3.20 (dd,  $J = 16.3, 8.6$  Hz, 1H), 2.66 (d,  $J = 15.7$  Hz, 1H), 2.01 – 1.91 (m, 2H), 1.90 – 1.85 (m, 1H), 1.38 (dd,  $J = 15.1, 5.7$  Hz, 1H);  $^{13}\text{C}$  NMR (126 MHz,  $\text{CDCl}_3$ )  $\delta$  201.3, 166.6, 147.8, 142.9, 129.4, 127.4, 119.5, 115.4, 110.5, 107.1, 101.9, 65.4, 56.6, 55.5, 47.7, 47.2, 40.5, 27.3, 23.5. **HRMS (ESI):** calcd. for  $\text{C}_{19}\text{H}_{22}\text{NO}_3$   $[\text{M}+\text{H}]^+$ : 312.1600, found: 312.1602.

**2,4-dimethoxy-1',2',3',3a'-tetrahydro-5'H-spiro[cyclohexane-1,4'-pyrrolo[1,2-a]quinoline]-2,4-dien-6-one (3x)**

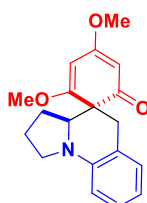

Flash column chromatography on a silica gel (ethyl acetate: petroleum ether, 1:15) afforded the product (18.0 mg, 58% yield) as a red solid.

$^1\text{H}$  NMR (500 MHz,  $\text{CDCl}_3$ )  $\delta$  7.09 (t,  $J = 7.6$  Hz, 1H), 6.97 (d,  $J = 7.4$  Hz, 1H), 6.60 (t,  $J = 7.3$  Hz, 1H), 6.50 (d,  $J = 8.0$  Hz, 1H), 5.63 (s, 1H), 5.51 (s, 1H), 4.03 – 3.91 (m, 1H), 3.76 (s, 3H), 3.60 (d,  $J = 16.3$  Hz, 2H), 3.35 (s, 3H), 3.12 (dd,  $J = 15.7, 7.8$  Hz, 1H), 2.74 (d,  $J = 16.6$  Hz, 1H), 1.95 – 1.80 (m, 3H), 1.46 (td,  $J = 7.9, 2.3$  Hz, 1H);  $^{13}\text{C}$  NMR (126 MHz,  $\text{CDCl}_3$ )  $\delta$  188.1, 175.0, 173.1, 144.1, 127.7, 126.7, 120.4, 115.4, 111.0, 102.4, 101.9, 61.6, 56.5, 55.8, 48.4, 45.2, 35.7, 27.4, 23.5. **HRMS (ESI):** calcd. for  $\text{C}_{19}\text{H}_{22}\text{NO}_3$   $[\text{M}+\text{H}]^+$ : 312.1600, found: 312.1602.

**4-(diethylamino)-1',2',3',3a'-tetrahydro-5'H-spiro[cyclohexane-1,4'-pyrrolo[1,2-a]quinoline]-2,4-dien-6-one (3y)**



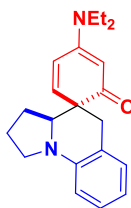

Flash column chromatography on a silica gel (ethyl acetate: petroleum ether, 1:80) afforded the product (31.2 mg, 97% yield) as a yellow solid.

**<sup>1</sup>H NMR** (500 MHz, CDCl<sub>3</sub>) δ 7.12 (t, *J* = 7.6 Hz, 1H), 7.03 (d, *J* = 7.3 Hz, 1H), 6.58 (t, *J* = 7.3 Hz, 1H), 6.50 (d, *J* = 8.1 Hz, 1H), 6.39 (dd, *J* = 10.5, 2.2 Hz, 1H), 6.16 (d, *J* = 10.5 Hz, 1H), 5.33 (d, *J* = 2.1 Hz, 1H), 3.86 (dd, *J* = 9.9, 5.1 Hz, 1H), 3.54 – 3.43 (m, 2H), 3.37 (q, *J* = 7.1 Hz, 4H), 3.18 (d, *J* = 7.5 Hz, 1H), 2.62 (d, *J* = 15.8 Hz, 1H), 1.99 – 1.87 (m, 3H), 1.34 – 1.28 (m, 1H), 1.22 (t, *J* = 7.1 Hz, 6H); **<sup>13</sup>C NMR** (126 MHz, CDCl<sub>3</sub>) δ 197.4, 156.5, 143.9, 143.2, 129.1, 127.3, 119.9, 118.5, 114.9, 110.1, 96.6, 64.4, 47.2, 45.7, 44.9, 39.7, 27.8, 23.5. **HRMS (ESI)**: calcd. for C<sub>21</sub>H<sub>27</sub>N<sub>2</sub>O [M+H]<sup>+</sup>: 323.2123, found: 323.2125.

**4-(pyrrolidin-1-yl)-1',2',3',3a'-tetrahydro-5'H-spiro[cyclohexane-1,4'-pyrrolo[1,2-a]quinoline]-2,4-dien-6-one (3z)**

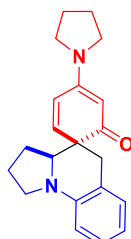

Flash column chromatography on a silica gel (ethyl acetate: petroleum ether, 1:100) afforded the product (41.7 mg, 96% yield) as a reddish brown solid.

**<sup>1</sup>H NMR** (500 MHz, CDCl<sub>3</sub>) δ 7.12 (t, *J* = 7.7 Hz, 1H), 7.02 (d, *J* = 7.3 Hz, 1H), 6.57 (t, *J* = 7.3 Hz, 1H), 6.49 (d, *J* = 8.1 Hz, 1H), 6.37 (d, *J* = 10.3 Hz, 1H), 6.14 (d, *J* = 10.3 Hz, 1H), 5.21 (s, 1H), 3.87 (dd, *J* = 9.9, 5.0 Hz, 1H), 3.54 (s, 2H), 3.50 – 3.41 (m, 2H), 3.32 (s, 2H), 3.18 (d, *J* = 8.0 Hz, 1H), 2.60 (d, *J* = 15.8 Hz, 1H), 2.00 (s, 4H), 1.95 (dd, *J* = 10.7, 5.4 Hz, 3H), 1.35 – 1.28 (m, 1H); **<sup>13</sup>C NMR** (126 MHz, CDCl<sub>3</sub>) δ 197.0, 155.9, 144.0, 143.2, 129.1, 127.3, 119.9, 119.9, 115.0, 110.1, 96.9, 64.3, 48.2, 47.9, 47.2, 46.2, 39.9, 27.9, 25.4, 24.8, 23.6. **HRMS (ESI)**: calcd. for C<sub>21</sub>H<sub>25</sub>N<sub>2</sub>O [M+H]<sup>+</sup>: 321.1967, found: 321.1969.

**4-(piperidin-1-yl)-1',2',3',3a'-tetrahydro-5'H-spiro[cyclohexane-1,4'-pyrrolo[1,2-a]quinoline]-2,4-dien-6-one (3za)**

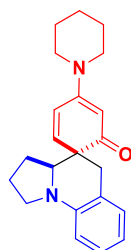

Flash column chromatography on a silica gel (ethyl acetate: petroleum ether, 1:100) afforded the

product (29.1 mg, 87% yield) as a red solid.

**<sup>1</sup>H NMR** (500 MHz, CDCl<sub>3</sub>) δ 7.12 (t, *J* = 7.6 Hz, 1H), 7.03 (d, *J* = 7.3 Hz, 1H), 6.59 (d, *J* = 7.2 Hz, 1H), 6.50 (d, *J* = 8.0 Hz, 1H), 6.46 (d, *J* = 10.5 Hz, 1H), 6.12 (d, *J* = 10.5 Hz, 1H), 5.45 (s, 1H), 3.84 (dd, *J* = 9.8, 4.7 Hz, 1H), 3.53 – 3.36 (m, 6H), 3.18 (d, *J* = 7.8 Hz, 1H), 2.62 (d, *J* = 15.8 Hz, 1H), 2.00 – 1.85 (m, 3H), 1.67 (dd, *J* = 25.1, 4.2 Hz, 6H), 1.32 (d, *J* = 10.2 Hz, 1H); **<sup>13</sup>C NMR** (126 MHz, CDCl<sub>3</sub>) δ 198.3, 157.9, 143.3, 143.2, 129.2, 127.3, 119.8, 118.8, 115.0, 110.2, 98.5, 64.4, 48.1, 47.2, 45.9, 39.7, 27.8, 25.6, 24.4, 23.5. **HRMS (ESI)**: calcd. for C<sub>22</sub>H<sub>27</sub>N<sub>2</sub>O [M+H]<sup>+</sup>: 335.2123, found: 335.2115.

### 1',2',3',3a'-tetrahydro-1*H*,5'*H*-spiro[naphthalene-2,4'-pyrrolo[1,2-*a*]quinolin]-1-one (3zb)

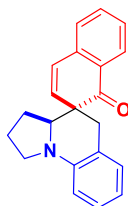

Flash column chromatography on a silica gel (ethyl acetate: petroleum ether, 1:150) afforded the product (21.4 mg, 71% yield) as a yellow solid.

**<sup>1</sup>H NMR** (500 MHz, CDCl<sub>3</sub>) δ 7.59 (t, *J* = 7.4 Hz, 1H), 7.38 (t, *J* = 7.5 Hz, 1H), 7.25 (d, *J* = 3.2 Hz, 1H), 7.16 (t, *J* = 7.7 Hz, 1H), 7.05 (d, *J* = 7.3 Hz, 1H), 6.67 (d, *J* = 10.0 Hz, 1H), 6.62 (t, *J* = 7.3 Hz, 1H), 6.55 (d, *J* = 8.1 Hz, 1H), 5.82 (d, *J* = 10.0 Hz, 1H), 3.85 (dd, *J* = 9.8, 5.7 Hz, 1H), 3.51 (t, *J* = 8.6 Hz, 1H), 3.46 (d, *J* = 15.5 Hz, 1H), 3.21 (dd, *J* = 16.7, 8.6 Hz, 1H), 2.73 (d, *J* = 15.5 Hz, 1H), 1.93 (dt, *J* = 17.1, 7.4 Hz, 2H), 1.80 (dt, *J* = 11.9, 6.0 Hz, 1H), 1.46 – 1.33 (m, 1H); **<sup>13</sup>C NMR** (126 MHz, CDCl<sub>3</sub>) δ 201.9, 143.0, 138.3, 134.6, 133.2, 129.4, 128.0, 127.6, 127.6, 126.7, 126.4, 119.2, 115.4, 110.4, 65.2, 47.7, 47.2, 39.7, 27.6, 23.6. **HRMS (ESI)**: calcd. for C<sub>21</sub>H<sub>20</sub>NO [M+H]<sup>+</sup>: 302.1545, found: 302.1543.

### 4-chloro-1',2',3',3a'-tetrahydro-1*H*,5'*H*-spiro[naphthalene-2,4'-pyrrolo[1,2-*a*]quinolin]-1-one (3zc)

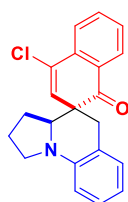

Flash column chromatography on a silica gel (ethyl acetate: petroleum ether, 1:20) afforded the product (27.6 mg, 75% yield,) as a yellow solid.

**<sup>1</sup>H NMR** (500 MHz, CDCl<sub>3</sub>) δ 8.12 (d, *J* = 7.5 Hz, 1H), 7.81 (d, *J* = 7.7 Hz, 1H), 7.71 (t, *J* = 7.5 Hz, 1H), 7.50 (t, *J* = 7.4 Hz, 1H), 7.18 (t, *J* = 7.5 Hz, 1H), 7.06 (d, *J* = 7.1 Hz, 1H), 6.65 (t, *J* = 7.1 Hz, 1H), 6.57 (d, *J* = 7.9 Hz, 1H), 5.99 (s, 1H), 3.90 – 3.74 (m, 1H), 3.49 (t, *J* = 10.9 Hz, 2H), 3.26 (q, *J* = 8.0 Hz, 1H), 2.80 (d, *J* = 15.6 Hz, 1H), 2.03 – 1.95 (m, 1H), 1.91 (d, *J* = 8.8 Hz, 1H), 1.85 – 1.77 (m, 1H), 1.46 – 1.33 (m, 1H); **<sup>13</sup>C NMR** (126 MHz, CDCl<sub>3</sub>) δ 199.8, 142.7, 135.8, 134.8, 130.2, 129.9, 129.5, 129.5, 129.2, 127.8, 127.0, 125.6, 118.5, 115.7, 110.7, 65.5, 49.7, 47.0, 39.5, 27.7, 23.5. **HRMS (ESI)**: calcd. for C<sub>21</sub>H<sub>19</sub>ClNO [M+H]<sup>+</sup>: 336.1155, found: 336.1158.

### 3-hydroxy-1',2',3',3a'-tetrahydro-2*H*,5'*H*-spiro[naphthalene-1,4'-pyrrolo[1,2-*a*]quinolin]-2-o

ne (3zd)

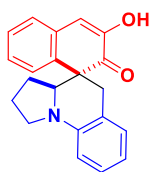

Flash column chromatography on a silica gel (ethyl acetate: petroleum ether, 1:20) afforded the product (24.7 mg, 78% yield, 4:1 dr) as a yellow solid.

**<sup>1</sup>H NMR** (500 MHz, CDCl<sub>3</sub>) δ 7.26 – 7.18 (m, 3H), 7.15 (d, *J* = 5 Hz, 1H), 7.0 (t, *J* = 10 Hz, 1H), 6.92 (s, 1H), 6.76 (d, *J* = 8.0 Hz, 1H), 6.71 (t, *J* = 10 Hz, 1H), 6.63 (d, *J* = 10 Hz, 1H), 6.43 (s, 1H), 3.81 (d, *J* = 16.8 Hz, 1H), 3.57 (dd, *J* = 8.4, 5.9 Hz, 1H), 3.48 – 3.41 (m, 1H), 3.17 (dd, *J* = 15.9, 7.4 Hz, 1H), 2.83 (d, *J* = 16.8 Hz, 1H), 1.79 – 1.66 (m, 2H), 1.52 – 1.43 (m, 1H), 1.11 – 0.98 (m, 1H); **<sup>13</sup>C NMR** (126 MHz, CDCl<sub>3</sub>) δ 197.7, 145.8, 143.5, 139.3, 137.9, 130.8, 129.0, 128.4, 128.1, 127.4, 127.2, 127.1, 126.7, 121.3, 118.5, 116.4, 115.9, 111.2, 110.8, 110.6, 67.5, 67.4, 51.2, 48.4, 48.1, 46.9, 39.6, 37.7, 29.3, 27.3, 27.2, 26.4, 23.1, 22.9. **HRMS (ESI)**: calcd. for C<sub>21</sub>H<sub>20</sub>NO<sub>2</sub> [M+H]<sup>+</sup>: 318.1494, found: 318.1496.

**9',10',10a',12'-tetrahydro-1H,8'H-spiro[naphthalene-2,11'-naphtho[1,8-ef]pyrrolo[1,2-a]azepin]-1-one (3ze)**

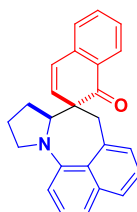

Flash column chromatography on a silica gel (ethyl acetate: petroleum ether, 1:20) afforded the product (18.6 mg, 53% yield, 1.5:1 dr) as a yellow solid.

**<sup>1</sup>H NMR** (500 MHz, CDCl<sub>3</sub>) δ 8.11 (t, *J* = 9.2 Hz, 1H), 7.64 (d, *J* = 8.1 Hz, 1H), 7.59 (q, *J* = 6.8 Hz, 1H), 7.43 – 7.35 (m, 1H), 7.29 (dd, *J* = 14.7, 8.1 Hz, 4H), 6.92 (d, *J* = 6.7 Hz, 1H), 6.81 (d, *J* = 9.8 Hz, 1H), 6.74 (t, *J* = 7.1 Hz, 1H), 6.55 (d, *J* = 9.8 Hz, 1H), 4.27 (d, *J* = 9.4 Hz, 1H), 3.56 (dd, *J* = 21.3, 11.7 Hz, 2H), 3.11 (dd, *J* = 16.2, 10.2 Hz, 1H), 2.54 – 2.51 (m, 1H), 2.19 – 2.14 (m, 1H), 1.99 – 1.95 (m, 1H), 1.69 – 1.67 (m, 1H), 1.38-1.34 (m, 1H); **<sup>13</sup>C NMR** (126 MHz, CDCl<sub>3</sub>) δ 201.3, 199.8, 150.5, 149.8, 138.1, 137.6, 136.6, 136.5, 135.6, 134.9, 134.5, 134.4, 133.8, 130.9, 128.8, 128.2, 128.1, 127.4, 127.4, 127.2, 126.9, 126.9, 126.8, 126.7, 126.6, 126.4, 126.4, 126.0, 125.6, 125.6, 125.5, 125.2, 124.8, 119.4, 118.8, 107.6, 107.4, 72.2, 70.4, 59.7, 57.9, 51.2, 50.7, 42.6, 42.4, 31.6, 28.9, 27.7, 25.5, 23.6, 22.7, 14.2. **HRMS (ESI)**: calcd. for C<sub>25</sub>H<sub>22</sub>NO [M+H]<sup>+</sup>: 352.1701, found: 352.1708.

**3,5-di-*tert*-butyl-1',2',3',3a'-tetrahydro-5'*H*-spiro[cyclohexane-1,4'-pyrrolo[1,2-a]quinoline]-2,5-dien-4-one (5a)**

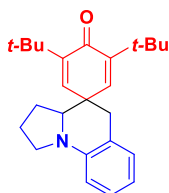

Flash column chromatography on a silica gel (ethyl acetate: petroleum ether, 1:200) afforded the

product (21.8 mg, 60% yield) as a yellow solid.

**<sup>1</sup>H NMR** (500 MHz, CDCl<sub>3</sub>) δ 7.14 (t, *J* = 7.7 Hz, 1H), 6.99 (d, *J* = 7.4 Hz, 1H), 6.62 (t, *J* = 7.3 Hz, 1H), 6.51 (d, *J* = 8.1 Hz, 1H), 6.35 (d, *J* = 2.9 Hz, 1H), 6.33 (d, *J* = 2.8 Hz, 1H), 3.63 (dd, *J* = 9.2, 6.2 Hz, 1H), 3.45 (td, *J* = 8.6, 3.6 Hz, 1H), 3.24 (dd, *J* = 16.5, 8.2 Hz, 1H), 3.18 (d, *J* = 15.8 Hz, 1H), 2.55 (d, *J* = 15.8 Hz, 1H), 1.91 (ddd, *J* = 15.2, 9.0, 5.7 Hz, 2H), 1.79 (ddd, *J* = 12.5, 6.3, 3.0 Hz, 1H), 1.27 (s, 9H), 1.13 (s, 9H); **<sup>13</sup>C NMR** (126 MHz, CDCl<sub>3</sub>) δ 186.8, 149.1, 148.2, 144.3, 143.5, 139.5, 129.0, 127.7, 118.6, 115.9, 110.6, 64.3, 47.5, 39.9, 38.4, 34.9, 34.9, 30.4, 29.5, 27.7, 23.3. **HRMS (ESI)**: calcd. for C<sub>25</sub>H<sub>34</sub>NO [M+H]<sup>+</sup>: 364.2640, found: 364.2642.

**3,5-di-*tert*-butyl-8'-methyl-1',2',3',3a'-tetrahydro-5'*H*-spiro[cyclohexane-1,4'-pyrrolo[1,2-*a*]quinoline]-2,5-dien-4-one (5b)**

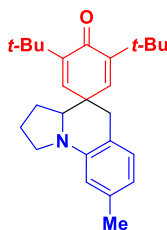

Flash column chromatography on a silica gel (ethyl acetate: petroleum ether, 1:200) afforded the product (32.1 mg, 85% yield) as a yellow solid.

**<sup>1</sup>H NMR** (500 MHz, CDCl<sub>3</sub>) δ 6.88 (d, *J* = 7.5 Hz, 1H), 6.45 (d, *J* = 7.4 Hz, 1H), 6.34 (d, *J* = 11.1 Hz, 3H), 3.59 (dd, *J* = 9.0, 6.3 Hz, 1H), 3.43 (td, *J* = 8.7, 3.5 Hz, 1H), 3.24 (q, *J* = 8.1 Hz, 1H), 3.13 (d, *J* = 15.7 Hz, 1H), 2.52 (d, *J* = 15.7 Hz, 1H), 2.31 (s, 3H), 1.95 – 1.83 (m, 2H), 1.77 (dtd, *J* = 9.6, 6.5, 3.0 Hz, 1H), 1.31 – 1.21 (m, 10H), 1.13 (s, 9H); **<sup>13</sup>C NMR** (126 MHz, CDCl<sub>3</sub>) δ 186.9, 148.9, 148.1, 144.4, 143.3, 139.7, 137.3, 128.8, 116.7, 115.7, 111.4, 77.3, 77.0, 76.8, 64.3, 47.4, 39.6, 38.7, 34.9, 34.8, 29.6, 29.5, 27.7, 23.3, 21.6. **HRMS (ESI)**: calcd. for C<sub>26</sub>H<sub>36</sub>NO [M+H]<sup>+</sup>: 378.2797, found: 378.2792.

**8'-bromo-3,5-di-*tert*-butyl-1',2',3',3a'-tetrahydro-5'*H*-spiro[cyclohexane-1,4'-pyrrolo[1,2-*a*]quinoline]-2,5-dien-4-one (5c)**

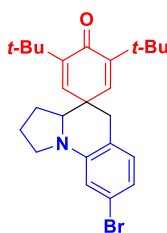

Flash column chromatography on a silica gel (ethyl acetate: petroleum ether, 1:200) afforded the product (22.1 mg, 50% yield) as a yellow solid.

**<sup>1</sup>H NMR** (500 MHz, CDCl<sub>3</sub>) δ 6.83 (d, *J* = 7.8 Hz, 1H), 6.72 (dd, *J* = 7.9, 1.9 Hz, 1H), 6.61 (d, *J* = 1.9 Hz, 1H), 6.33 (d, *J* = 2.9 Hz, 1H), 6.24 (d, *J* = 2.9 Hz, 1H), 3.61 (dd, *J* = 9.5, 6.0 Hz, 1H), 3.43 (td, *J* = 8.8, 3.2 Hz, 1H), 3.20 (dd, *J* = 16.4, 8.7 Hz, 1H), 3.08 (dd, *J* = 15.8, 0.8 Hz, 1H), 2.51 (d, *J* = 15.8 Hz, 1H), 1.98 – 1.84 (m, 2H), 1.79 (dtd, *J* = 10.0, 6.4, 3.2 Hz, 1H), 1.29 – 1.23 (m, 11H), 1.13 (s, 10H); **<sup>13</sup>C NMR** (126 MHz, CDCl<sub>3</sub>) δ 186.7, 149.4, 148.5, 144.5, 143.7, 138.7, 130.2, 121.3, 118.5, 117.5, 113.1, 77.3, 77.0, 76.8, 64.1, 47.5, 39.5, 38.0, 35.0, 34.9, 29.5, 29.5, 27.7, 23.3. **HRMS (ESI)**: calcd. for C<sub>25</sub>H<sub>33</sub>BrNO [M+H]<sup>+</sup>: 442.1746, found: 442.1746.

**methyl(*E*)-3-(3,5-di-*tert*-butyl-4-oxo-1',2',3',3a'-tetrahydro-5'*H*-spiro[cyclohexane-1,4'-pyrrolo[1,2-*a*]quinoline]-2,5-dien-8'-yl)acrylate (5d)**

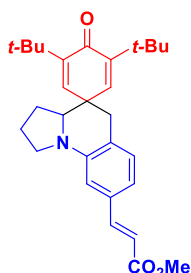

Flash column chromatography on a silica gel (ethyl acetate: petroleum ether, 1:200) afforded the product (35.8 mg, 80% yield) as a yellow solid.

**<sup>1</sup>H NMR** (500 MHz, CDCl<sub>3</sub>) δ 7.66 (d, *J* = 16.0 Hz, 1H), 7.00 (d, *J* = 7.5 Hz, 1H), 6.81 (d, *J* = 7.5 Hz, 1H), 6.62 (s, 1H), 6.41 (d, *J* = 15.9 Hz, 1H), 6.34 (s, 1H), 6.27 (s, 1H), 3.81 (s, 3H), 3.68 – 3.59 (m, 1H), 3.48 (t, *J* = 8.5 Hz, 1H), 3.26 (d, *J* = 8.2 Hz, 1H), 3.16 (d, *J* = 16.1 Hz, 1H), 2.58 (d, *J* = 16.1 Hz, 1H), 1.93 (dd, *J* = 16.7, 7.8 Hz, 2H), 1.80 (dd, *J* = 7.7, 4.4 Hz, 1H), 1.31 (s, 1H), 1.26 (s, 9H), 1.12 (s, 9H); **<sup>13</sup>C NMR** (126 MHz, CDCl<sub>3</sub>) δ 186.7, 167.7, 149.4, 148.5, 145.8, 143.7, 143.7, 138.9, 133.8, 129.4, 121.6, 116.6, 116.3, 109.5, 64.3, 51.6, 47.5, 40.0, 38.2, 35.0, 34.9, 29.5, 27.8, 23.3. **HRMS (ESI)**: calcd. for C<sub>29</sub>H<sub>38</sub>NO<sub>3</sub> [M+H]<sup>+</sup>: 448.2852, found: 448.2856.

**3,5-di-*tert*-butyl-7'-chloro-1',2',3',3a'-tetrahydro-5'*H*-spiro[cyclohexane-1,4'-pyrrolo[1,2-*a*]quinoline]-2,5-dien-4-one (5e)**

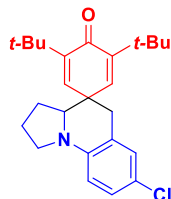

Flash column chromatography on a silica gel (ethyl acetate: petroleum ether, 1:200) afforded the product (24.6 mg, 62% yield) as a white solid.

**<sup>1</sup>H NMR** (500 MHz, CDCl<sub>3</sub>) δ 7.08 (d, *J* = 8.6 Hz, 1H), 6.95 (s, 1H), 6.41 (d, *J* = 8.6 Hz, 1H), 6.32 (d, *J* = 1.7 Hz, 1H), 6.25 (s, 1H), 3.60 (dd, *J* = 9.0, 6.3 Hz, 1H), 3.50 – 3.39 (m, 1H), 3.20 (d, *J* = 8.2 Hz, 1H), 3.12 (d, *J* = 15.9 Hz, 1H), 2.51 (d, *J* = 15.9 Hz, 1H), 1.90 (dd, *J* = 17.2, 9.0 Hz, 2H), 1.79 (dd, *J* = 7.4, 4.5 Hz, 1H), 1.34 – 1.23 (m, 10H), 1.13 (s, 9H); **<sup>13</sup>C NMR** (126 MHz, CDCl<sub>3</sub>) δ 186.7, 149.4, 148.5, 143.7, 142.1, 138.8, 128.6, 127.5, 120.3, 120.1, 111.6, 64.3, 47.6, 39.7, 38.1, 35.0, 34.9, 29.5, 27.7, 23.3. **HRMS (ESI)**: calcd. for C<sub>25</sub>H<sub>33</sub>ClNO [M+H]<sup>+</sup>: 398.2251, found: 398.2253.

**6'-bromo-3,5-di-*tert*-butyl-1',2',3',3a'-tetrahydro-5'*H*-spiro[cyclohexane-1,4'-pyrrolo[1,2-*a*]quinoline]-2,5-dien-4-one (5f)**

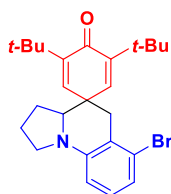

Flash column chromatography on a silica gel (ethyl acetate: petroleum ether, 1:200) afforded the product (22.9 mg, 52% yield) as a yellow solid.

**<sup>1</sup>H NMR** (500 MHz, CDCl<sub>3</sub>) δ 6.99 (t, *J* = 7.9 Hz, 1H), 6.89 (d, *J* = 7.9 Hz, 1H), 6.46 (d, *J* = 8.1 Hz, 1H), 6.35 (s, 1H), 6.27 (s, 1H), 3.61 – 3.50 (m, 1H), 3.43 (d, *J* = 3.0 Hz, 1H), 3.27 (d, *J* = 8.2 Hz, 1H), 2.92 (d, *J* = 16.7 Hz, 1H), 2.84 (d, *J* = 16.7 Hz, 1H), 1.98 – 1.84 (m, 2H), 1.81 (dd, *J* = 9.8, 6.3 Hz, 1H), 1.31 (d, *J* = 11.7 Hz, 1H), 1.28 (s, 9H), 1.15 (s, 9H); **<sup>13</sup>C NMR** (126 MHz, CDCl<sub>3</sub>) δ 186.7, 149.3, 148.6, 144.9, 143.6, 138.8, 128.4, 125.5, 119.9, 118.2, 109.9, 63.7, 47.7, 40.2, 38.9, 35.0, 34.9, 29.5, 29.5, 27.5, 23.4. **HRMS (ESI)**: calcd. for C<sub>25</sub>H<sub>33</sub>BrNO [M+H]<sup>+</sup>: 442.1746, found: 442.1749.

**3,5-di-*tert*-butyl-6a',6b',7',8',9',10',10a',11'-octahydro-5'*H*-spiro[cyclohexane-1,6'-isoindolo[2,1-*a*]quinoline]-2,5-dien-4-one (5g)**

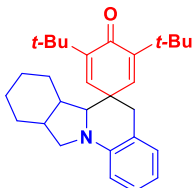

Flash column chromatography on a silica gel (ethyl acetate: petroleum ether, 1:200) afforded the product (31.3 mg, 75% yield) as a yellow solid.

**<sup>1</sup>H NMR** (500 MHz, CDCl<sub>3</sub>) δ 7.13 (t, *J* = 7.3 Hz, 1H), 6.93 (d, *J* = 7.0 Hz, 1H), 6.57 (t, *J* = 6.9 Hz, 1H), 6.46 (d, *J* = 7.8 Hz, 1H), 6.40 (s, 1H), 6.31 (s, 1H), 3.58 (t, *J* = 7.5 Hz, 1H), 3.39 (d, *J* = 7.2 Hz, 1H), 3.14 (d, *J* = 15.3 Hz, 1H), 2.72 (t, *J* = 9.4 Hz, 1H), 2.40 (d, *J* = 15.4 Hz, 1H), 1.97 (d, *J* = 12.0 Hz, 1H), 1.81 – 1.61 (m, 4H), 1.26 (s, 10H), 1.11 (s, 10H), 1.08 – 0.94 (m, 3H); **<sup>13</sup>C NMR** (126 MHz, CDCl<sub>3</sub>) δ 186.7, 148.4, 147.0, 144.8, 143.2, 140.2, 128.7, 127.8, 117.8, 115.2, 109.4, 68.8, 51.7, 48.3, 43.4, 40.8, 37.9, 34.9, 34.9, 29.8, 29.5, 29.3, 29.2, 25.7. **HRMS (ESI)**: calcd. for C<sub>29</sub>H<sub>40</sub>NO [M+H]<sup>+</sup>: 418.3110, found: 418.3105.

**3,5-di-*tert*-butyl-8a',9',10',11'-tetrahydro-7'*H*-spiro[cyclohexane-1,8'-naphtho[1,8-*ef*]pyrrolo[1,2-*a*]azepine]-2,5-dien-4-one (5h)**

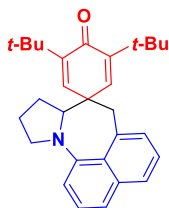

Flash column chromatography on a silica gel (ethyl acetate: petroleum ether, 1:200) afforded the product (37.8 mg, 91% yield) as a brown solid.

**<sup>1</sup>H NMR** (500 MHz, CDCl<sub>3</sub>) δ 7.65 (d, *J* = 8.2 Hz, 1H), 7.31 (s, 3H), 7.05 (d, *J* = 6.6 Hz, 1H), 6.86 (s, 1H), 6.71 (s, 2H), 3.78 (d, *J* = 13.0 Hz, 1H), 3.66 (d, *J* = 9.3 Hz, 1H), 3.56 (d, *J* = 6.4 Hz, 1H), 3.07 (d, *J* = 8.7 Hz, 1H), 2.48 (d, *J* = 13.0 Hz, 1H), 1.92 (d, *J* = 6.8 Hz, 2H), 1.67 – 1.59 (m, 1H), 1.33 (s, 9H), 1.24 (s, 10H); **<sup>13</sup>C NMR** (126 MHz, CDCl<sub>3</sub>) δ 186.7, 150.5, 148.5, 147.5, 142.9, 142.9, 135.5, 134.7, 127.3, 126.8, 125.9, 125.8, 125.5, 119.1, 107.6, 70.8, 51.7, 49.4, 44.3, 35.1, 34.9, 29.6, 26.9, 25.3. **HRMS (ESI)**: calcd. for C<sub>29</sub>H<sub>36</sub>NO [M+H]<sup>+</sup>: 414.2797, found: 414.2790.

**1',2',3a,3',3a',4'-hexahydro-5'*H*,6*H*-spiro[benzo[*d*][1,3]dioxole-5,4'-pyrrolo[1,2-*a*]quinolin]-6-one (6a)**

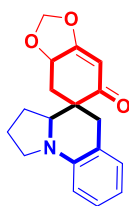

Flash column chromatography on a silica gel (ethyl acetate: petroleum ether, 1:20) afforded the product (17.8 mg, 60% yield) as a yellow solid.

**<sup>1</sup>H NMR** (500 MHz, CDCl<sub>3</sub>) δ 7.12 (t, *J* = 7.5 Hz, 1H), 7.01 (d, *J* = 7.2 Hz, 1H), 6.46 (d, *J* = 7.9 Hz, 1H), 5.62 (s, 1H), 5.52 (s, 1H), 5.31 (s, 1H), 4.68 (dd, *J* = 10.9, 5.4 Hz, 1H), 3.99 (d, *J* = 6.4 Hz, 1H), 3.32 (dd, *J* = 15.2, 7.6 Hz, 2H), 2.98 (d, *J* = 15.9 Hz, 1H), 2.80 (d, *J* = 15.9 Hz, 1H), 2.09 – 1.88 (m, 4H), 1.81 (t, *J* = 11.8 Hz, 1H), 1.54 (d, *J* = 8.3 Hz, 1H); **<sup>13</sup>C NMR** (126 MHz, CDCl<sub>3</sub>) δ 197.8, 186.8, 149.3, 148.4, 146.5, 143.9, 143.8, 139.4, 139.2, 135.7, 129.6, 128.8, 127.1, 119.0, 115.0, 109.2, 64.4, 47.5, 39.7, 38.4, 35.0, 34.9, 30.3, 29.6, 29.6, 27.8, 26.7, 23.3. **HRMS (ESI):** calcd. for C<sub>18</sub>H<sub>20</sub>NO<sub>3</sub> [M+H]<sup>+</sup>: 298.1443, found: 298.1445.

#### 6-(2-(2-phenylpyrrolidin-1-yl)benzyl)benzo[*d*][1,3]dioxol-5-ol (7a)

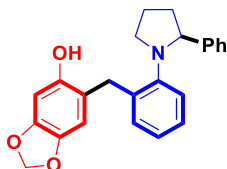

Flash column chromatography on a silica gel (ethyl acetate: petroleum ether, 1:10) afforded the product (24.6 mg, 66% yield) as a red solid.

**<sup>1</sup>H NMR** (500 MHz, CDCl<sub>3</sub>) δ 10.00 (s, 1H), 7.11 (d, *J* = 22.5 Hz, 7H), 7.03 (t, *J* = 7.5 Hz, 1H), 6.92 (t, *J* = 7.1 Hz, 1H), 6.51 (s, 1H), 6.38 (s, 1H), 5.70 (d, *J* = 7.0 Hz, 2H), 4.21 (t, *J* = 7.2 Hz, 1H), 3.45 (s, 1H), 3.36 (q, *J* = 14.2 Hz, 2H), 2.99 (dd, *J* = 15.7, 8.5 Hz, 1H), 2.37 (dd, *J* = 16.6, 9.2 Hz, 1H), 2.20 (s, 2H), 2.03 (d, *J* = 3.8 Hz, 1H); **<sup>13</sup>C NMR** (126 MHz, CDCl<sub>3</sub>) δ 149.2, 146.8, 146.1, 140.9, 139.7, 138.6, 130.6, 128.4, 128.1, 127.6, 127.5, 125.9, 122.4, 119.9, 108.8, 100.8, 99.4, 70.4, 56.1, 33.5, 32.9, 23.2. **HRMS (ESI):** calcd. for C<sub>24</sub>H<sub>24</sub>NO<sub>3</sub> [M+H]<sup>+</sup>: 374.1756, found: 374.1758.

#### 6-(2-(2-allylpyrrolidin-1-yl)benzyl)benzo[*d*][1,3]dioxol-5-ol (7b)

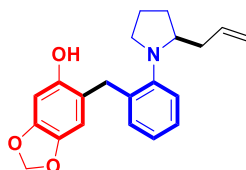

Flash column chromatography on a silica gel (ethyl acetate: petroleum ether, 1:10) afforded the product (25.3 mg, 75% yield) as a red solid.

**<sup>1</sup>H NMR** (500 MHz, CDCl<sub>3</sub>) δ 7.08 (t, *J* = 7.6 Hz, 1H), 6.97 (d, *J* = 7.2 Hz, 1H), 6.54 (t, *J* = 7.2 Hz, 1H), 6.39 (d, *J* = 8.0 Hz, 1H), 5.98 (td, *J* = 16.6, 7.9 Hz, 1H), 5.49 (d, *J* = 9.9 Hz, 2H), 5.19 (dd, *J* = 18.4, 14.1 Hz, 2H), 5.01 (s, 1H), 4.61 (s, 1H), 3.77 (dd, *J* = 10.4, 4.4 Hz, 1H), 3.29 (t, *J* = 9.1 Hz, 1H), 3.20 (q, *J* = 8.6 Hz, 1H), 3.02 (d, *J* = 14.9 Hz, 1H), 2.70 (d, *J* = 14.9 Hz, 1H), 2.55 (dd, *J* = 13.2, 7.2 Hz, 1H), 2.47 (dd, *J* = 13.2, 7.3 Hz, 1H), 2.34 (dd, *J* = 11.6, 5.7 Hz, 1H), 2.06 – 1.96 (m, 1H), 1.94 – 1.79 (m, 1H), 1.65 (dd, *J* = 20.1, 10.8 Hz, 1H); **<sup>13</sup>C NMR** (126 MHz, CDCl<sub>3</sub>) δ 145.9, 145.6, 143.7, 133.7,

129.3, 127.3, 120.0, 119.5, 114.9, 109.4, 99.4, 99.3, 96.1, 62.1, 46.2, 42.9, 41.7, 36.4, 30.1, 23.7.  
**HRMS (ESI):** calcd. for C<sub>21</sub>H<sub>24</sub>NO<sub>3</sub> [M+H]<sup>+</sup>: 338.1756, found: 338.1753.

**6-(2-(2-vinylpyrrolidin-1-yl)benzyl)benzo[d][1,3]dioxol-5-ol (7c)**

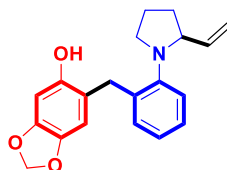

Flash column chromatography on a silica gel (ethyl acetate: petroleum ether, 1:10) afforded the product (24.2 mg, 75% yield) as a red solid.

**<sup>1</sup>H NMR** (500 MHz, CDCl<sub>3</sub>) δ 10.40 (s, 1H), 7.32 (d, *J* = 7.4 Hz, 1H), 7.21 – 7.11 (m, 2H), 7.08 (t, *J* = 7.1 Hz, 1H), 6.70 (s, 1H), 6.43 (s, 1H), 5.80 (d, *J* = 15.5 Hz, 2H), 5.74 (dd, *J* = 17.5, 8.9 Hz, 1H), 5.07 (d, *J* = 17.1 Hz, 1H), 5.00 (d, *J* = 10.2 Hz, 1H), 3.92 (d, *J* = 14.0 Hz, 1H), 3.89 – 3.79 (m, 1H), 3.66 (d, *J* = 14.0 Hz, 1H), 3.58 (t, *J* = 8.8 Hz, 1H), 2.90 – 2.79 (m, 1H), 2.20 (dd, *J* = 9.5, 6.5 Hz, 1H), 2.17 – 2.07 (m, 1H), 2.05 – 1.92 (m, 2H); **<sup>13</sup>C NMR** (126 MHz, CDCl<sub>3</sub>) δ 149.6, 146.9, 145.0, 140.7, 138.5, 137.1, 130.7, 127.4, 125.9, 121.8, 119.7, 118.3, 108.7, 100.7, 99.4, 67.1, 55.9, 33.8, 30.9, 22.3. **HRMS (ESI):** calcd. for C<sub>20</sub>H<sub>22</sub>NO<sub>3</sub> [M+H]<sup>+</sup>: 324.1600, found: 324.1601.

**6-(2-(2-ethylpyrrolidin-1-yl)benzyl)benzo[d][1,3]dioxol-5-ol (7d)**

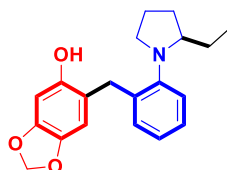

Flash column chromatography on a silica gel (ethyl acetate: petroleum ether, 1:10) afforded the product (21.1 mg, 65% yield) as a red solid.

**<sup>1</sup>H NMR** (500 MHz, CDCl<sub>3</sub>) δ 10.57 (s, 1H), 7.35 (d, *J* = 7.4 Hz, 1H), 7.20 (t, *J* = 7.4 Hz, 1H), 7.16 (d, *J* = 7.8 Hz, 1H), 7.11 (t, *J* = 7.1 Hz, 1H), 6.70 (s, 1H), 6.42 (s, 1H), 5.81 (d, *J* = 12.5 Hz, 2H), 3.91 (d, *J* = 13.9 Hz, 1H), 3.69 (d, *J* = 13.9 Hz, 1H), 3.50 (t, *J* = 8.8 Hz, 1H), 3.28 – 3.12 (m, 1H), 2.78 (q, *J* = 8.7 Hz, 1H), 2.31 – 2.19 (m, 1H), 2.17 – 2.04 (m, 1H), 1.95 (d, *J* = 8.7 Hz, 1H), 1.74 (dd, *J* = 19.1, 9.4 Hz, 1H), 1.51 (dd, *J* = 11.1, 9.0 Hz, 1H), 1.33 (dt, *J* = 20.2, 8.4 Hz, 1H), 0.85 (t, *J* = 7.3 Hz, 3H); **<sup>13</sup>C NMR** (126 MHz, CDCl<sub>3</sub>) δ 149.5, 146.8, 145.7, 140.7, 139.1, 130.8, 127.6, 126.0, 121.4, 119.9, 108.7, 100.7, 99.5, 65.8, 56.4, 33.8, 29.3, 24.9, 21.8, 11.5. **HRMS (ESI):** calcd. for C<sub>20</sub>H<sub>24</sub>NO<sub>3</sub> [M+H]<sup>+</sup>: 326.1756, found: 326.1759.

**6-(2-(2-ethynylpyrrolidin-1-yl)benzyl)benzo[d][1,3]dioxol-5-ol (7e)**

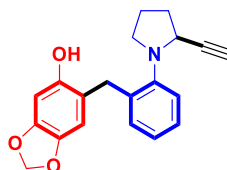

Flash column chromatography on a silica gel (ethyl acetate: petroleum ether, 1:10) afforded the product (26.3 mg, 82% yield) as a yellow solid.



**<sup>1</sup>H NMR** (500 MHz, CDCl<sub>3</sub>) δ 9.86 (s, 1H), 7.34 (d, *J* = 7.4 Hz, 1H), 7.25 (d, *J* = 6.8 Hz, 1H), 7.20 (t, *J* = 7.5 Hz, 1H), 7.13 (t, *J* = 7.2 Hz, 1H), 6.72 (s, 1H), 6.41 (s, 1H), 5.81 (d, *J* = 14.0 Hz, 2H), 4.21 (s, 1H), 3.87 (d, *J* = 14.1 Hz, 1H), 3.79 (d, *J* = 14.1 Hz, 1H), 3.53 (dd, *J* = 15.4, 7.5 Hz, 1H), 3.02 (t, *J* = 9.9 Hz, 1H), 2.53 – 2.38 (m, 1H), 2.27 – 2.12 (m, 3H), 2.12 – 1.98 (m, 1H); **<sup>13</sup>C NMR** (126 MHz, CDCl<sub>3</sub>) δ 149.8, 146.9, 143.7, 140.6, 137.9, 130.7, 127.3, 126.5, 122.2, 119.1, 108.7, 100.8, 99.0, 81.8, 73.7, 55.8, 51.7, 33.5, 31.8, 22.2. **HRMS (ESI)**: calcd. for C<sub>20</sub>H<sub>20</sub>NO<sub>3</sub> [M+H]<sup>+</sup>: 322.1443, found: 322.1444.

## Reference

- Jurberg, I. D.; Peng, B.; Węstefeld, E.; Wasserloos, M.; Maulide, N. *Angew. Chem. Int. Ed.* **2012**, *51*, 1950.

## 5. Crystal Structures and Data

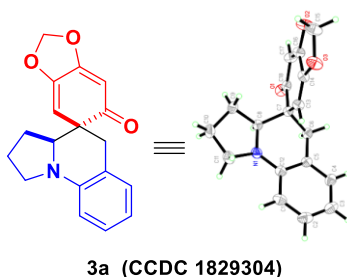

Table 1. Crystal data and structure refinement for **3a**.

|                                 |                                                 |                         |
|---------------------------------|-------------------------------------------------|-------------------------|
| Identification code             | <b>3a</b>                                       |                         |
| Empirical formula               | C <sub>18</sub> H <sub>17</sub> NO <sub>3</sub> |                         |
| Formula weight                  | 295.33                                          |                         |
| Temperature                     | 293(2) K                                        |                         |
| Wavelength                      | 1.54184 Å                                       |                         |
| Crystal system, space group     | triclinic, P-1                                  |                         |
| Unit cell dimensions            | a = 8.5960(6) Å                                 | alpha = 101.132(7) deg. |
|                                 | b = 9.3242(8) Å                                 | beta = 103.244(6) deg.  |
|                                 | c = 9.5215(7) Å                                 | gamma = 96.071(6) deg.  |
| Volume                          | 719.84(10) Å <sup>3</sup>                       |                         |
| Z, Calculated density           | 2, 1.363 Mg/m <sup>3</sup>                      |                         |
| Absorption coefficient          | 0.754 mm <sup>-1</sup>                          |                         |
| F(000)                          | 312                                             |                         |
| Crystal size                    | 0.08 x 0.07 x 0.07 mm                           |                         |
| Theta range for data collection | 4.89 to 67.23 deg.                              |                         |
| Limiting indices                | -10 ≤ h ≤ 6, -10 ≤ k ≤ 11, -11 ≤ l ≤ 11         |                         |
| Reflections collected / unique  | 4109 / 2581 [R(int) = 0.0241]                   |                         |
| Completeness to theta = 67.23   | 99.9 %                                          |                         |
| Max. and min. transmission      | 0.9491 and 0.9421                               |                         |
| Refinement method               | Full-matrix least-squares on F <sup>2</sup>     |                         |
| Data / restraints / parameters  | 2581 / 0 / 200                                  |                         |

|                                   |                                    |
|-----------------------------------|------------------------------------|
| Goodness-of-fit on F <sup>2</sup> | 1.111                              |
| Final R indices [I>2sigma(I)]     | R1 = 0.0510, wR2 = 0.1461          |
| R indices (all data)              | R1 = 0.0547, wR2 = 0.1520          |
| Extinction coefficient            | 0.039(4)                           |
| Largest diff. peak and hole       | 0.380 and -0.241 e.A <sup>-3</sup> |

## 6. <sup>1</sup>H and <sup>13</sup>C NMR Spectra

### 1',2',3',3a'-tetrahydro-5'H,6H-spiro[benzo[d][1,3]dioxole-5,4'-pyrrolo[1,2-a]quinolin]-6-one (3a)

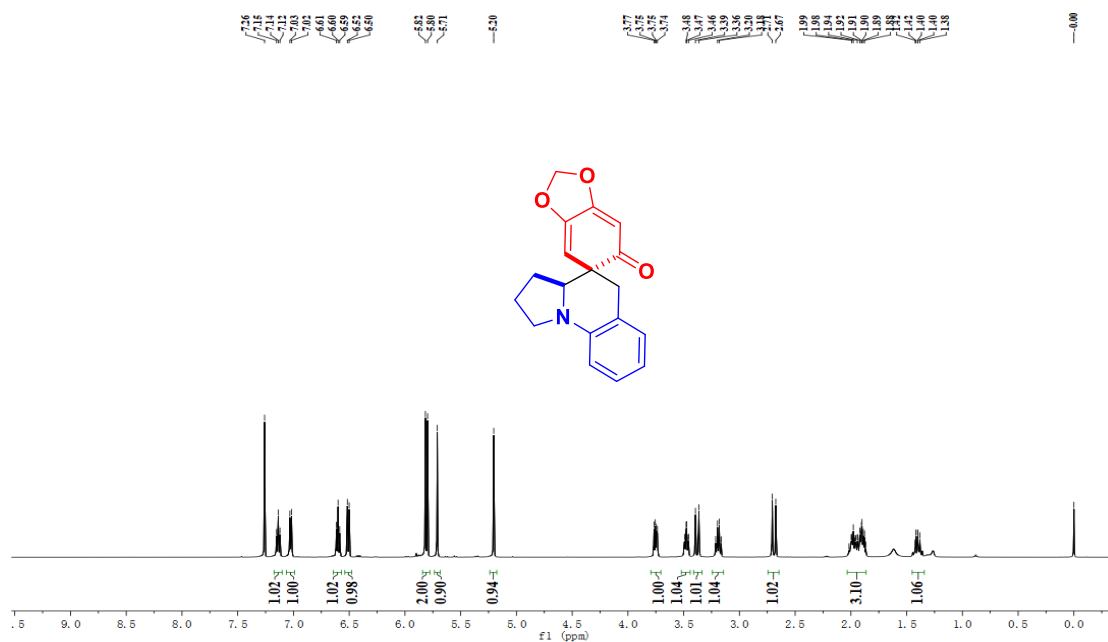

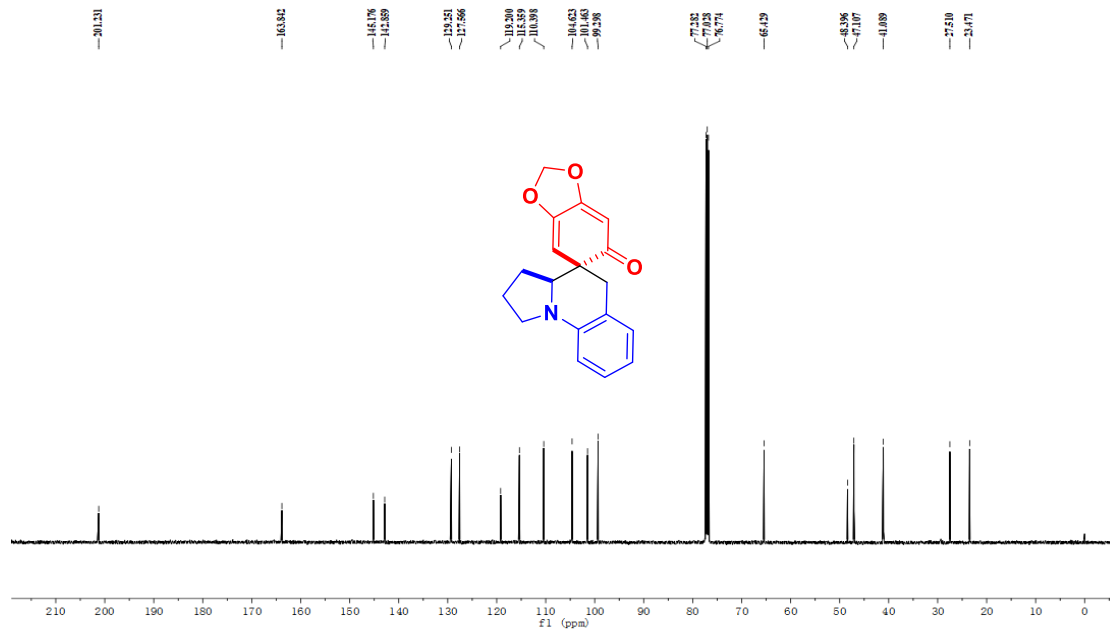

**8'-methyl-1',2',3',3a'-tetrahydro-5'H,6H-spiro[benzo[d][1,3]dioxole-5,4'-pyrrolo[1,2-a]quinolin]-6-one (3b)**

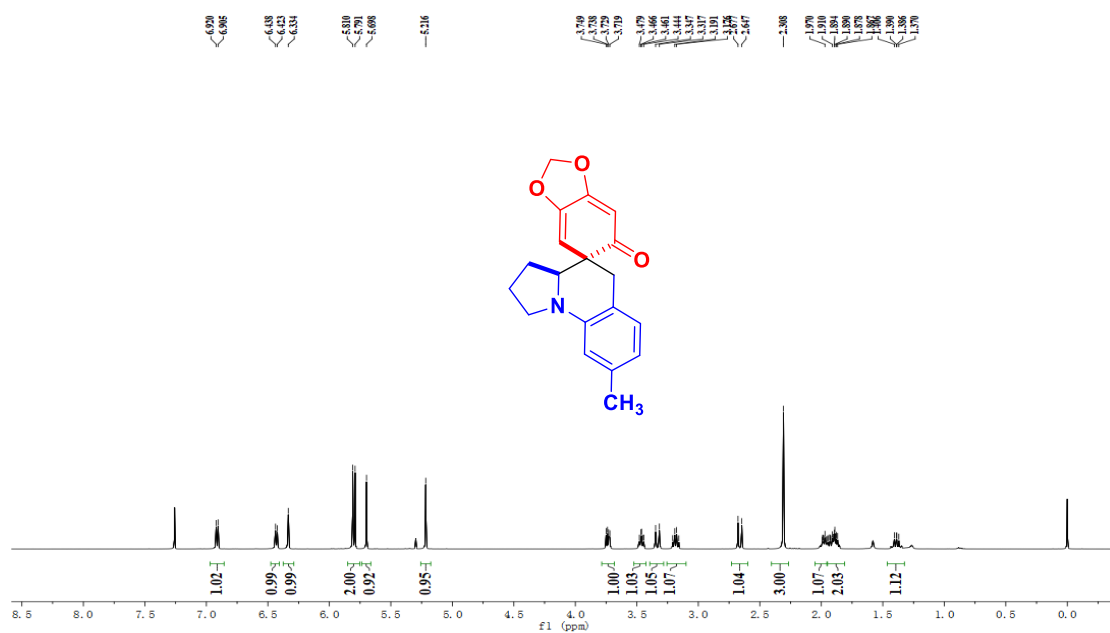

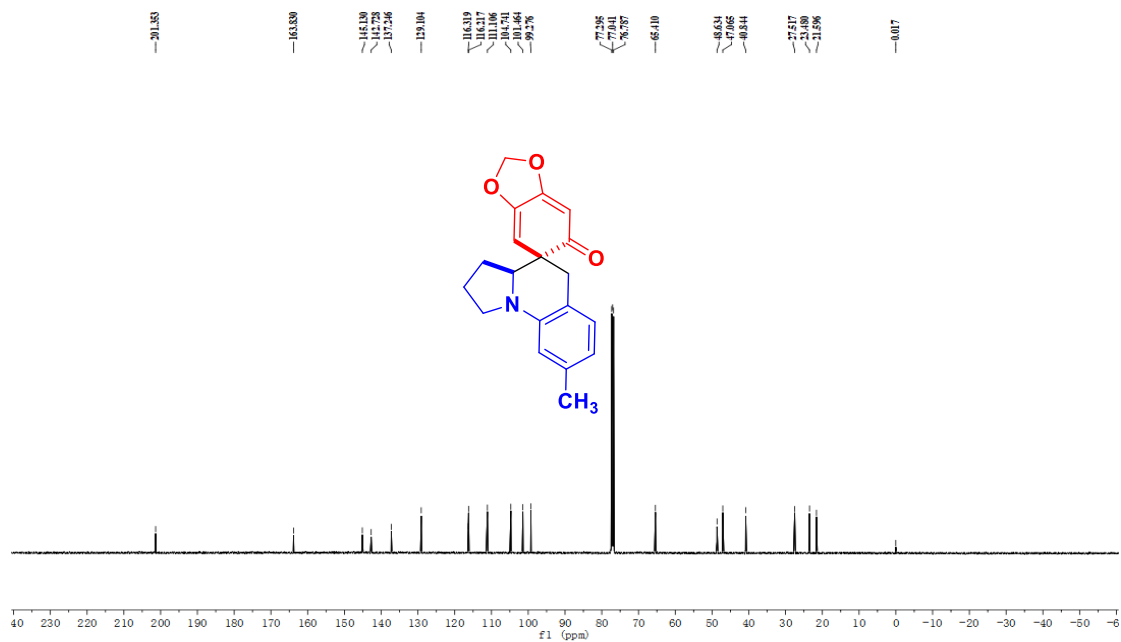

**8'-(trifluoromethyl)-1',2',3',3a'-tetrahydro-5'H,6H-spiro[benzo[d][1,3]dioxole-5,4'-pyrrolo[1,2-a]quinolin]-6-one (3c)**

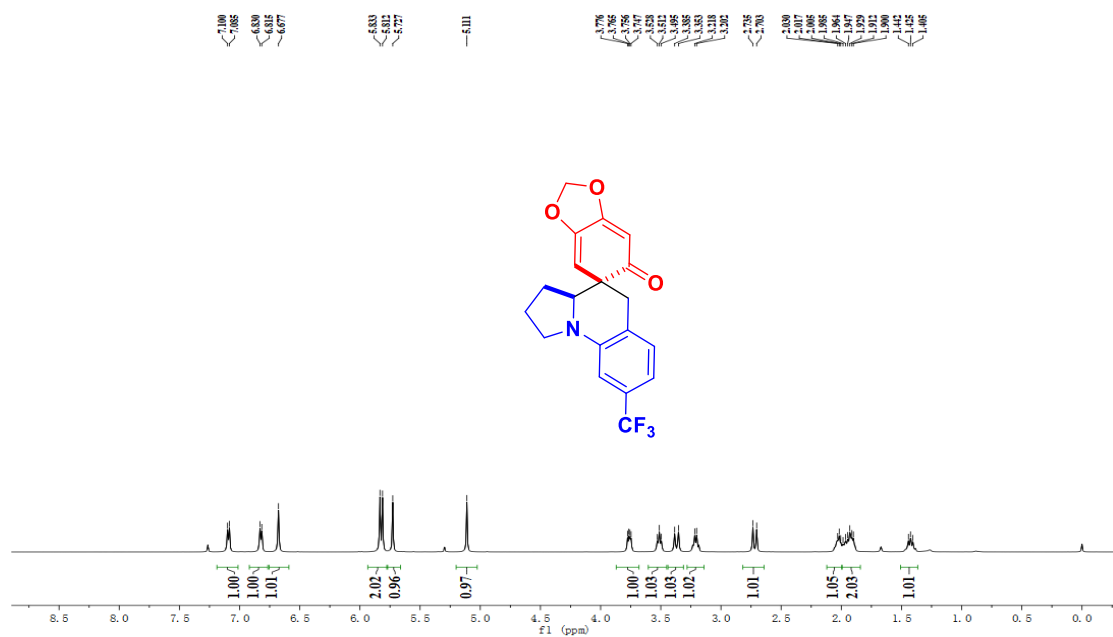

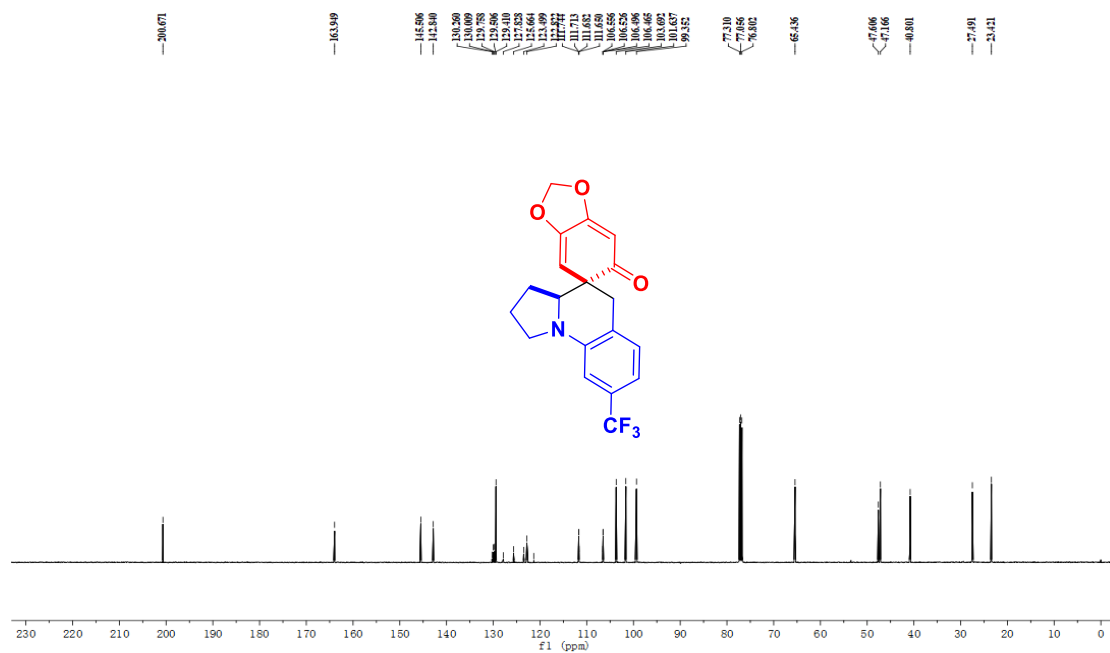

**8'-chloro-1',2',3',3a'-tetrahydro-5'H,6H-spiro[benzo[d][1,3]dioxole-5,4'-pyrrolo[1,2-a]quinolin]-6-one (3d)**

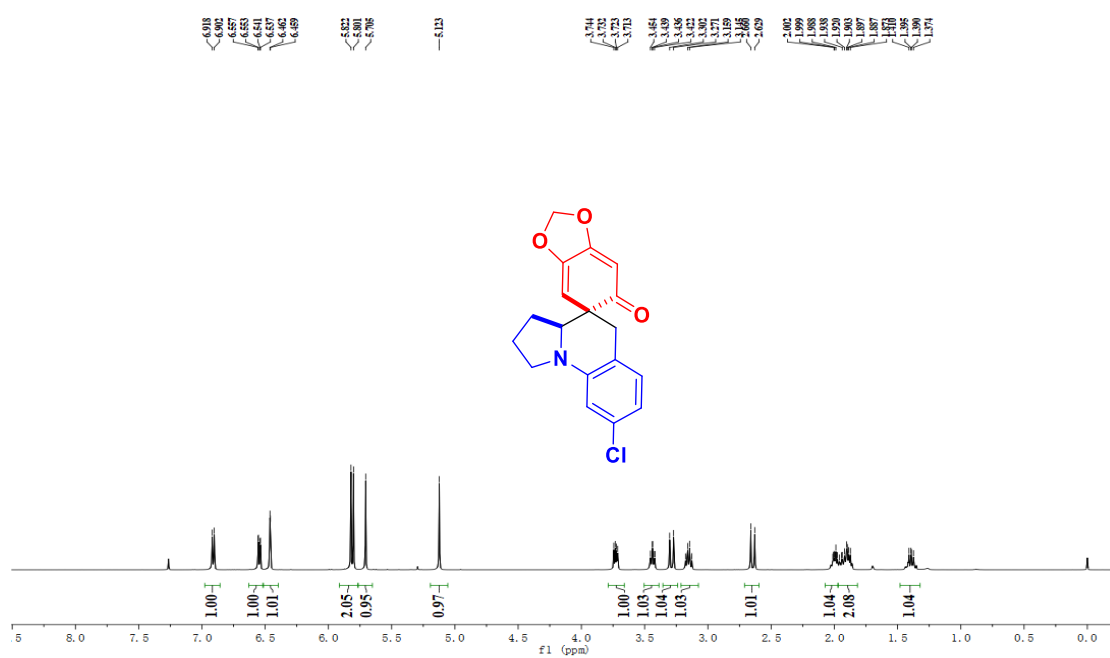

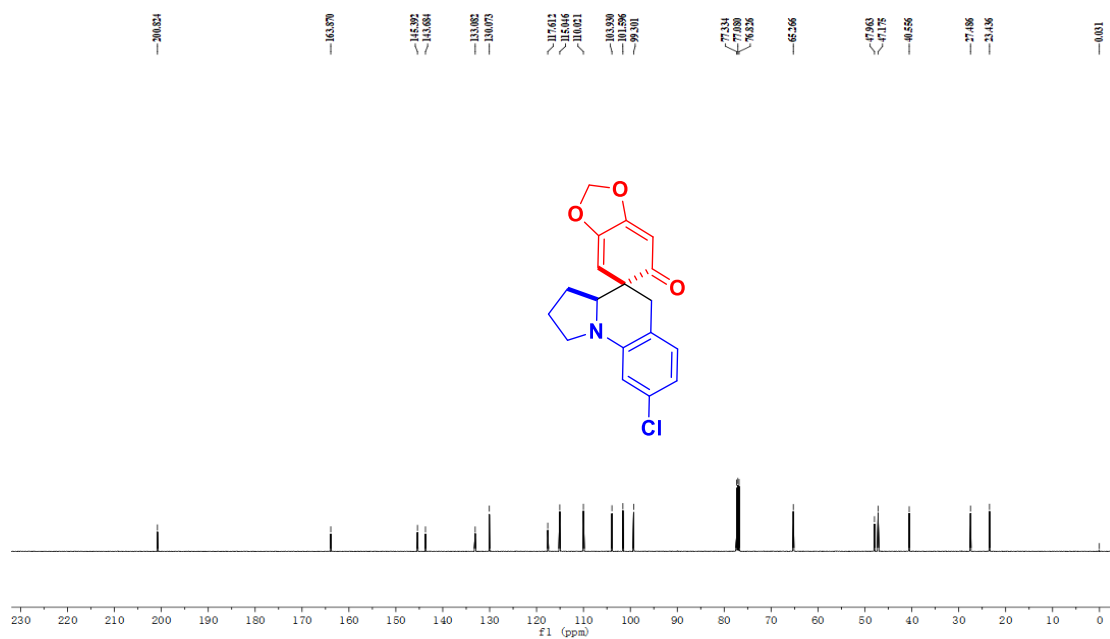

**8'-bromo-1',2',3',3a'-tetrahydro-5'H,6H-spiro[benzo[d][1,3]dioxole-5,4'-pyrrolo[1,2-a]quinolin]-6-one (3e)**

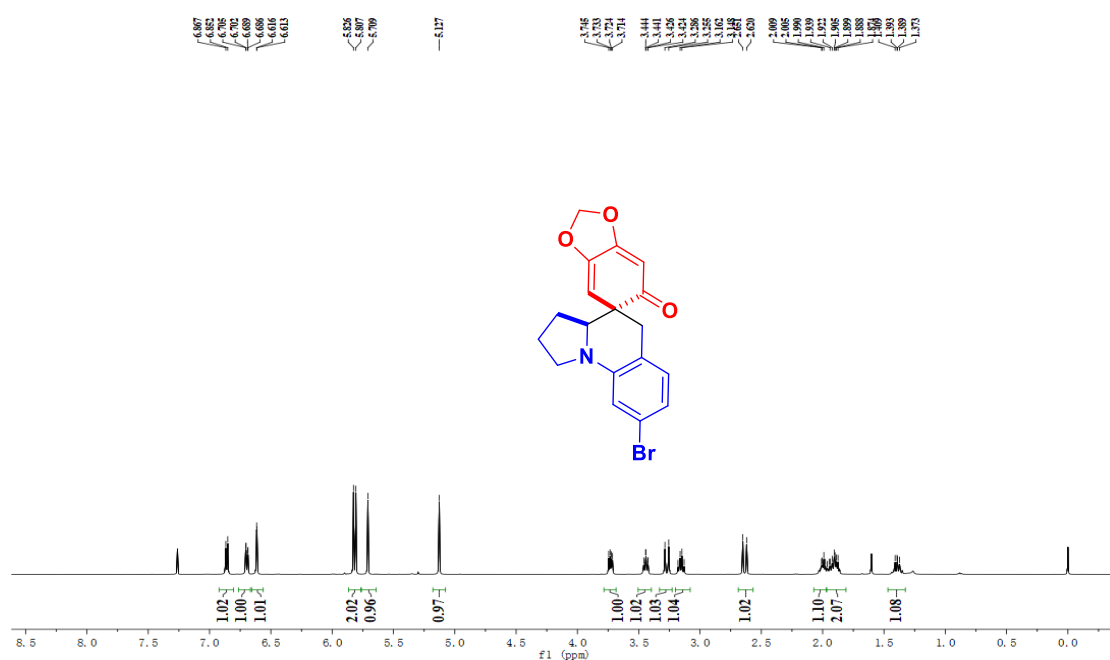

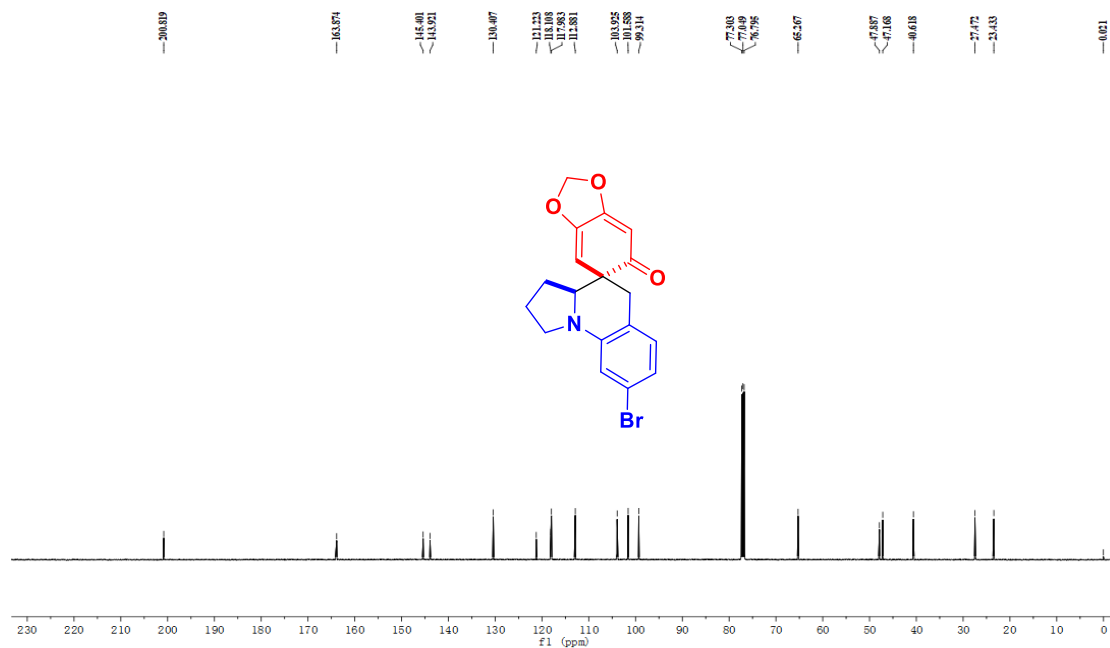

8'-(4,4,5,5-tetramethyl-1,3-dioxolan-2-yl)-1',2',3',3a'-tetrahydro-5'H,6H-spiro[benzo[d][1,3]dioxole-5,4'-pyrrolo[1,2-a]quinolin]-6-one (3f)

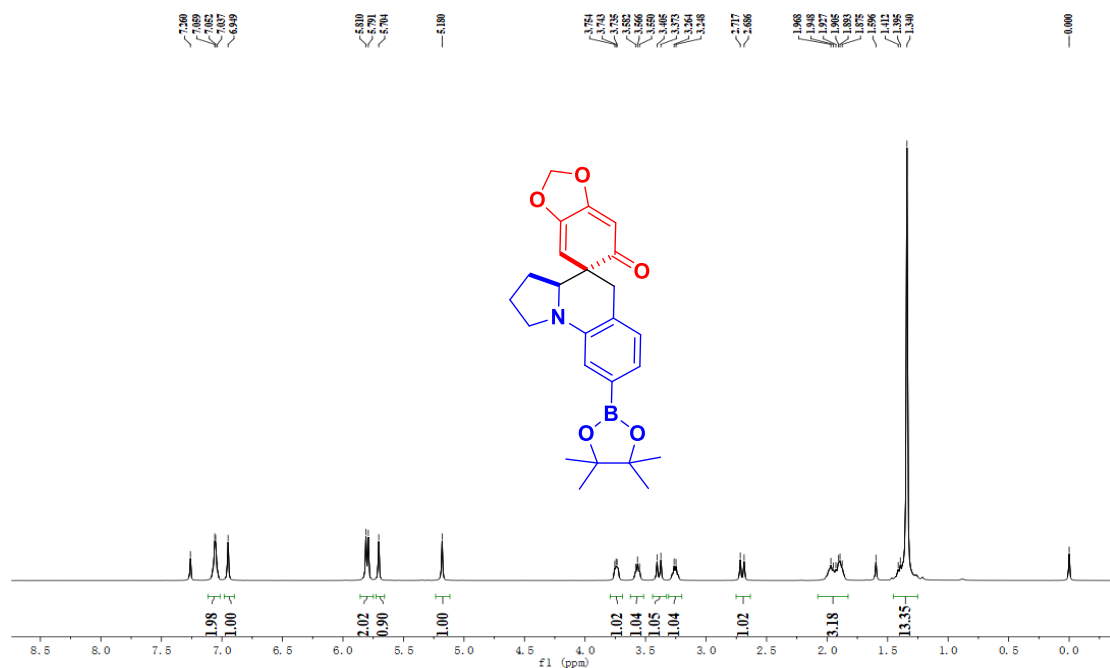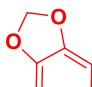

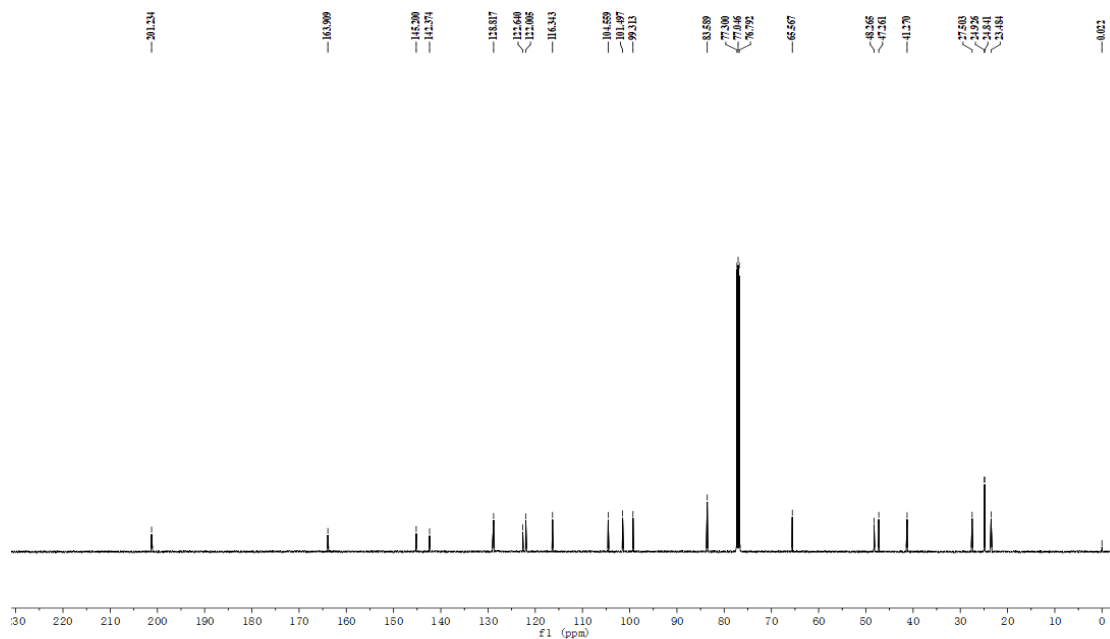

**methyl(*E*)-3-(6-oxo-1',2',3',3a'-tetrahydro-5'*H*,6*H*-spiro[benzo[*d*][1,3]dioxole-5,4'-pyrrolo[1,2-*a*]quinolin]-8'-yl)acrylate (3g)**

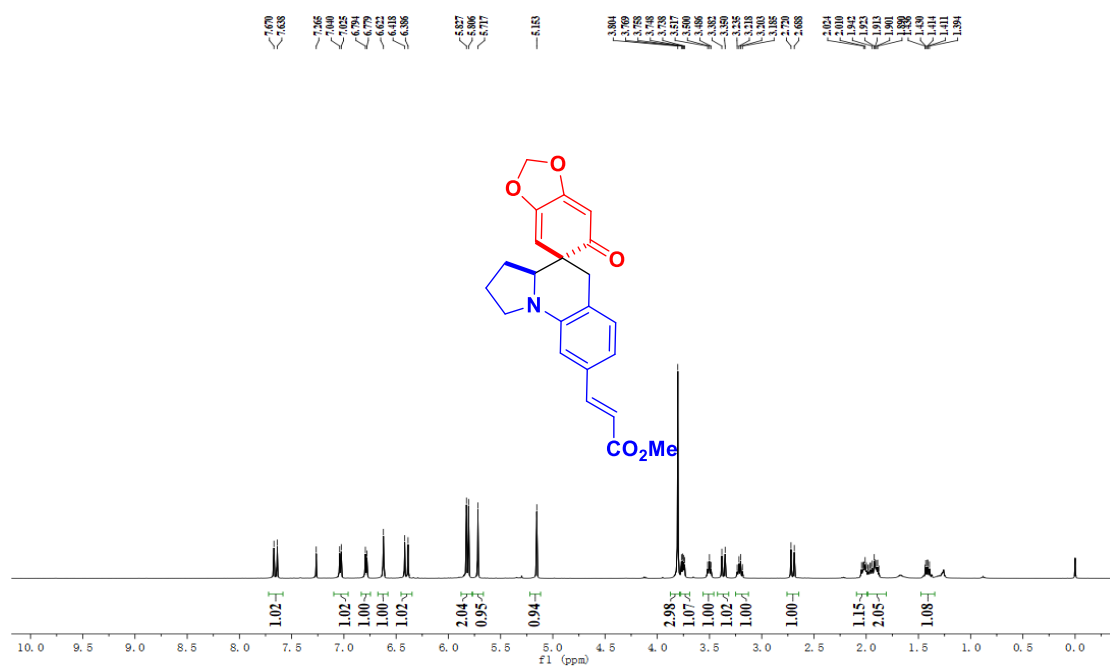



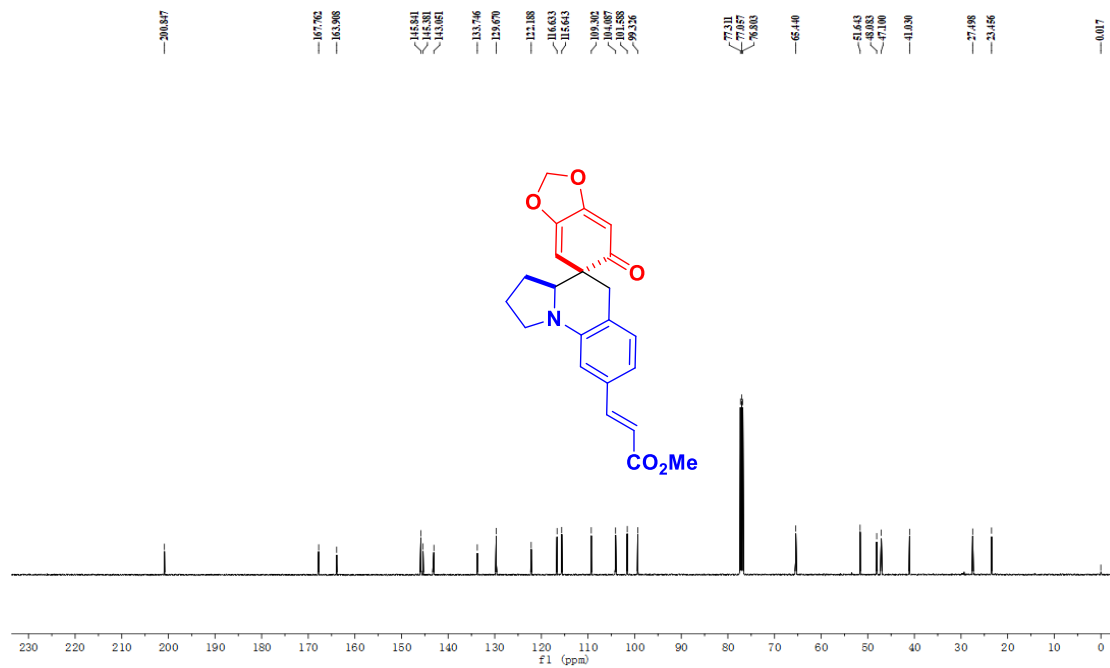

**6-oxo-1',2',3',3a'-tetrahydro-5'H,6H-spiro[benzo[d][1,3]dioxole-5,4'-pyrrolo[1,2-a]quinoline]-8'-carbonitrile (3h)**

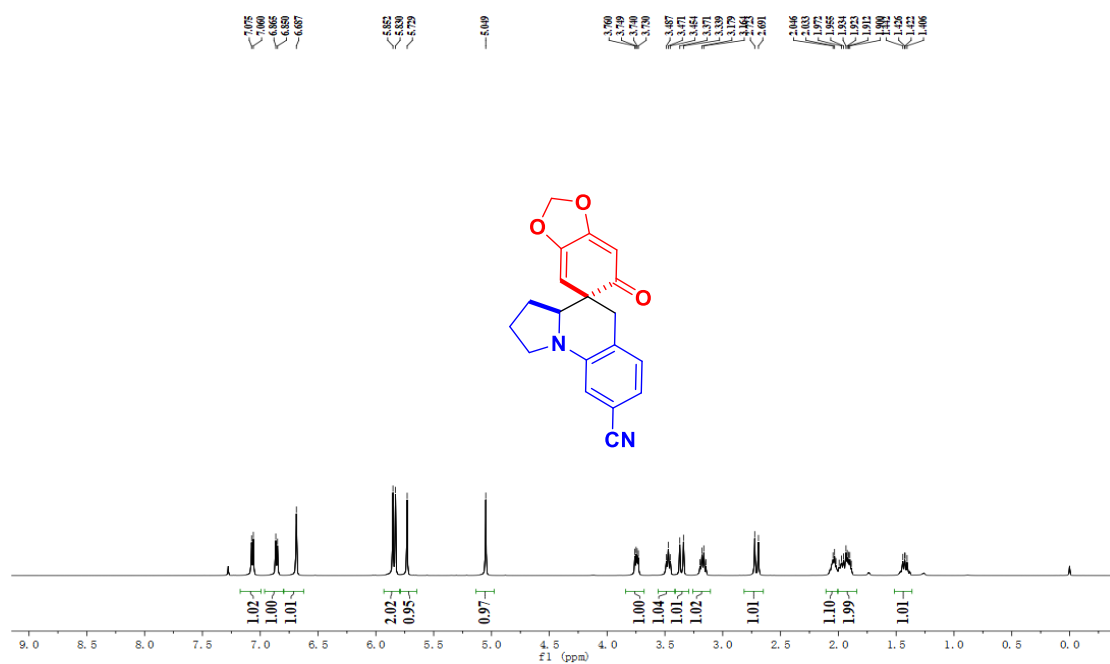

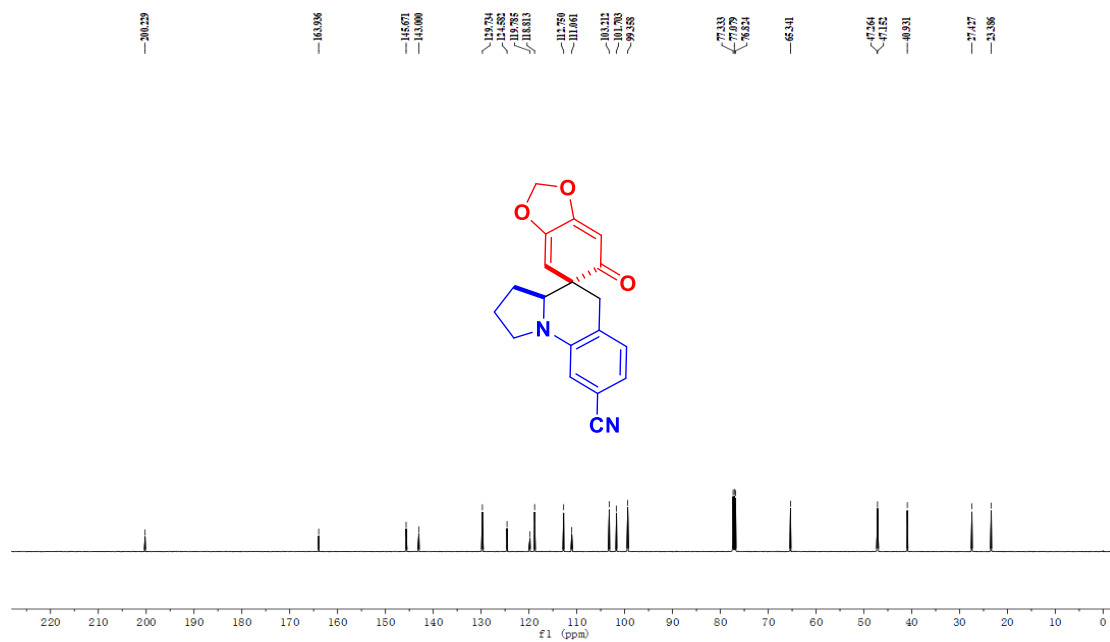

8'-((4-methoxyphenyl)ethynyl)-1',2',3',3a'-tetrahydro-5'H,6H-spiro[benzo[d][1,3]dioxole-5,4'-pyrrolo[1,2-a]quinolin]-6-one (3i)

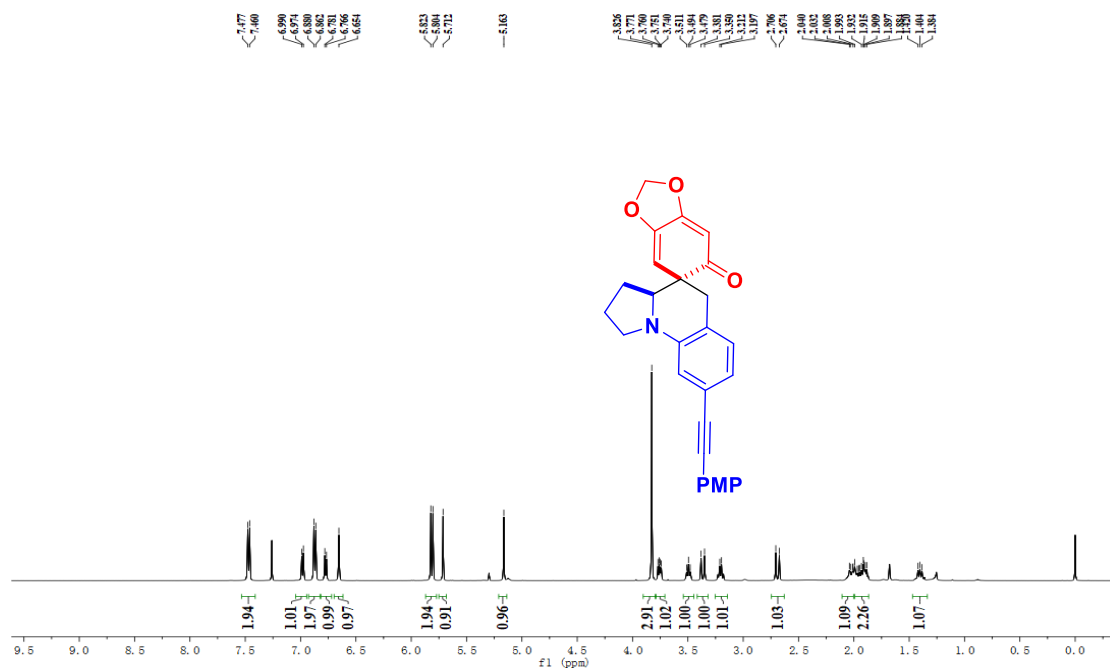

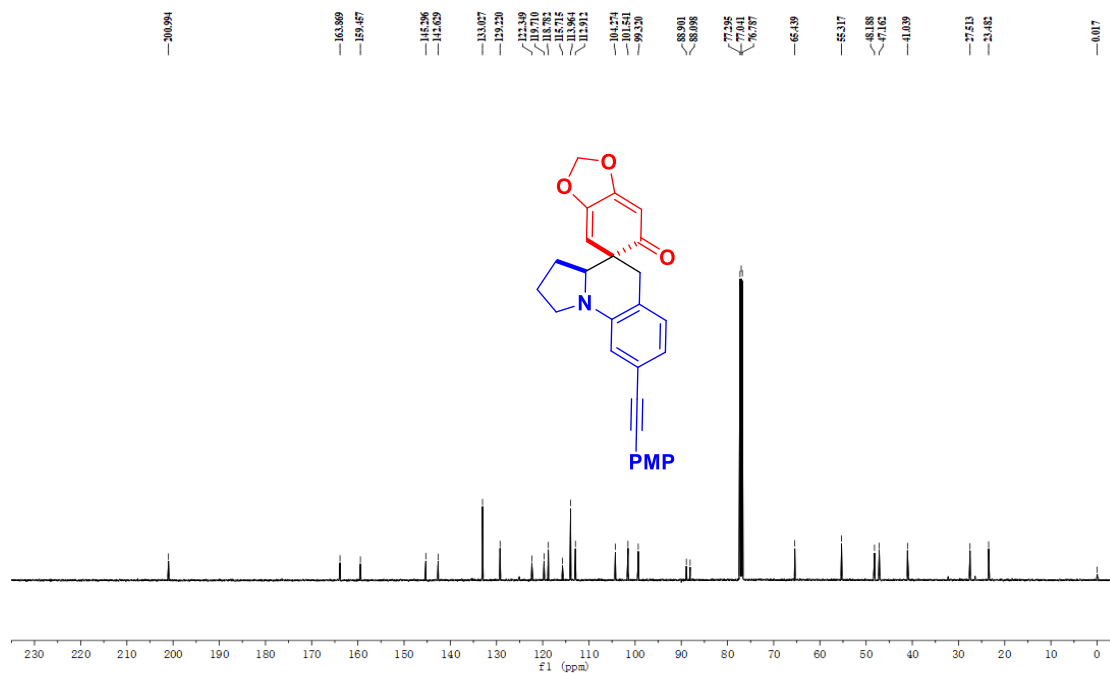

**8'-(4-acetylphenyl)-1',2',3',3a'-tetrahydro-5H,6H-spiro[benzo[d][1,3]dioxole-5,4'-pyrrolo[1,2-a]quinolin]-6-one (3j)**

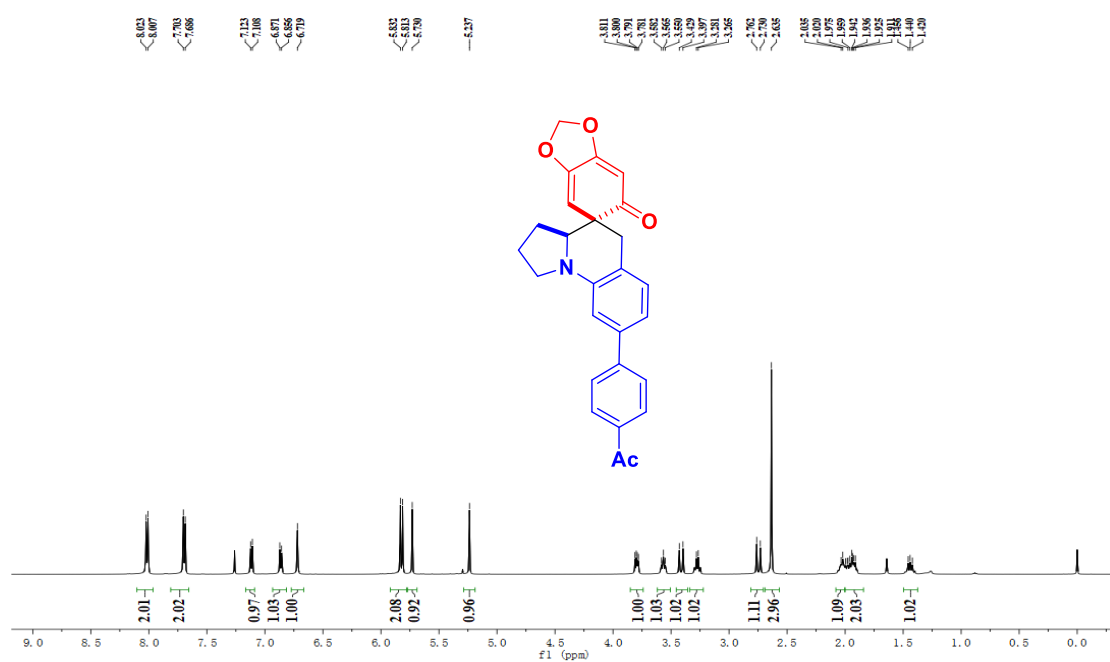

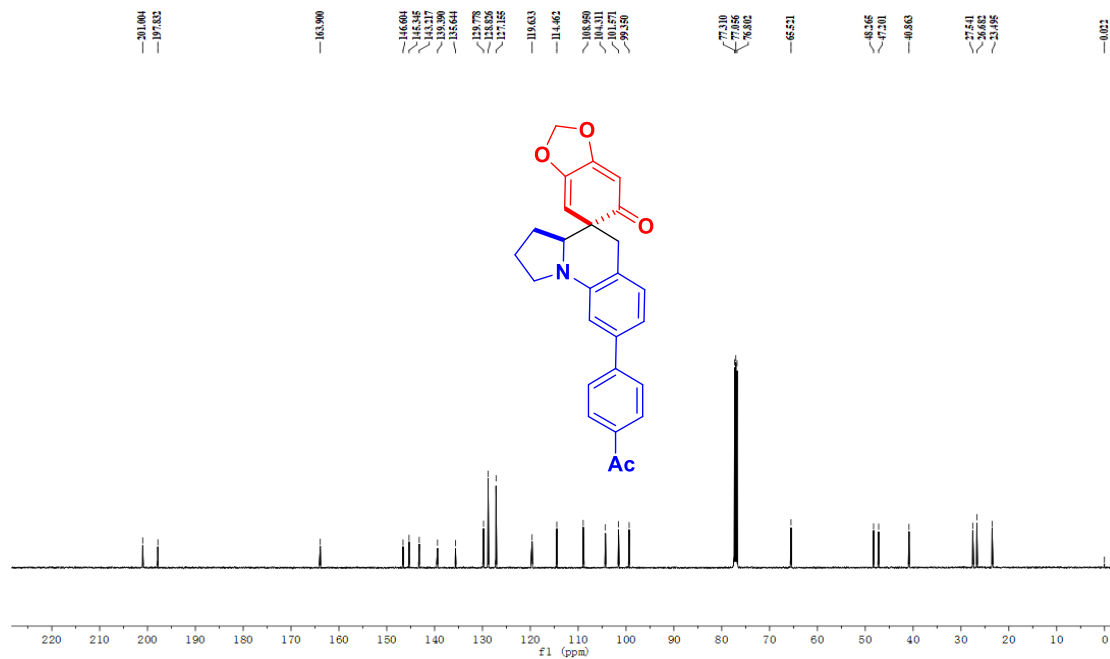

**8'-(thiophen-2-yl)-1',2',3',3a'-tetrahydro-5'H,6H-spiro[benzo[d][1,3]dioxole-5,4'-pyrrolo[1,2-a]quinolin]-6-one (3k)**

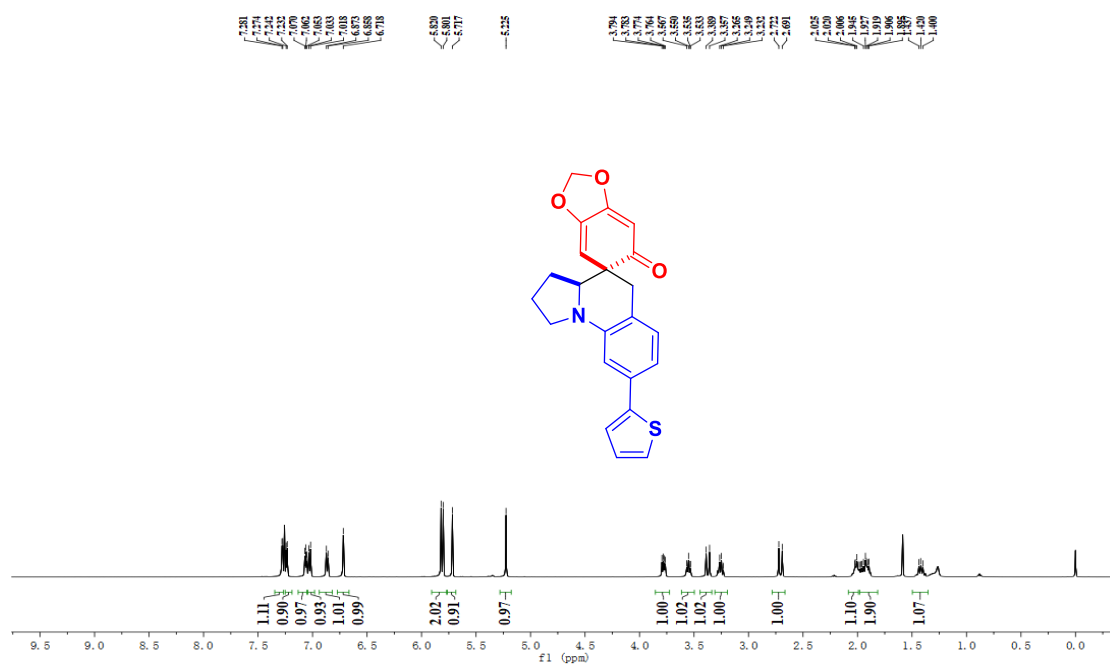

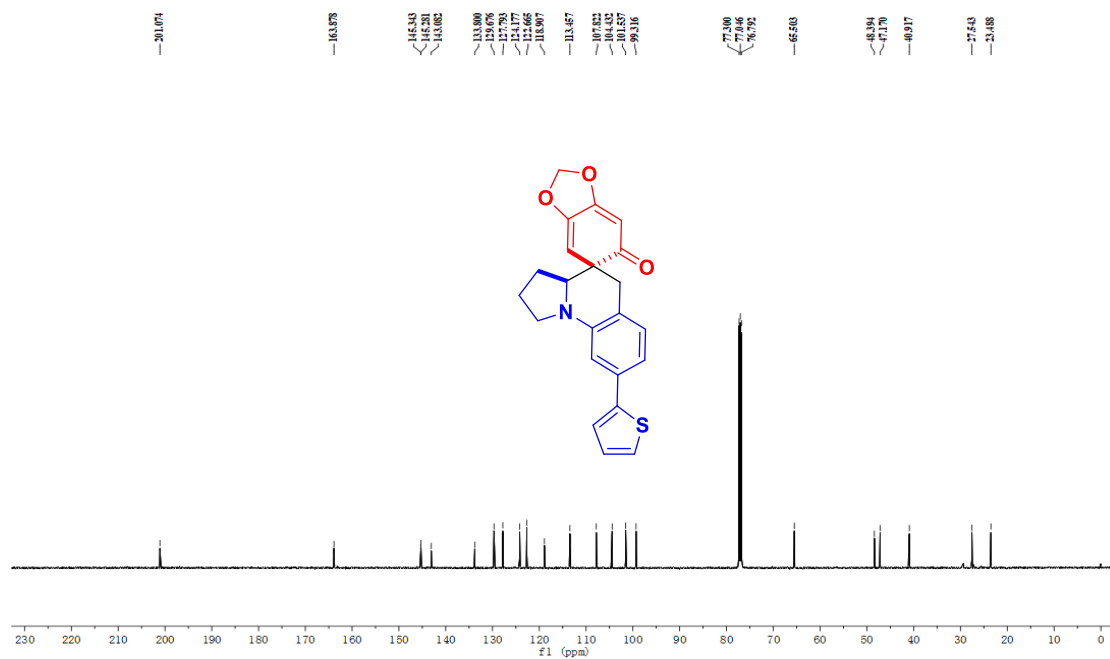

**7'-methoxy-1',2',3',3a'-tetrahydro-5'H,6H-spiro[benzo[d][1,3]dioxole-5,4'-pyrrolo[1,2-a]quinolin]-6-one (3l)**

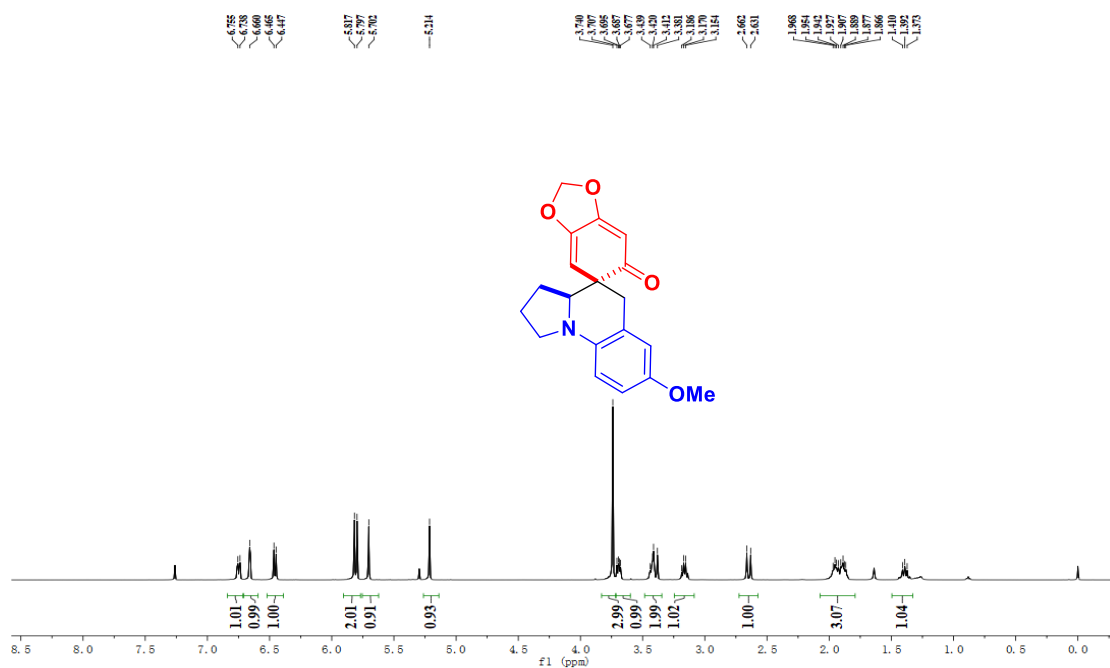

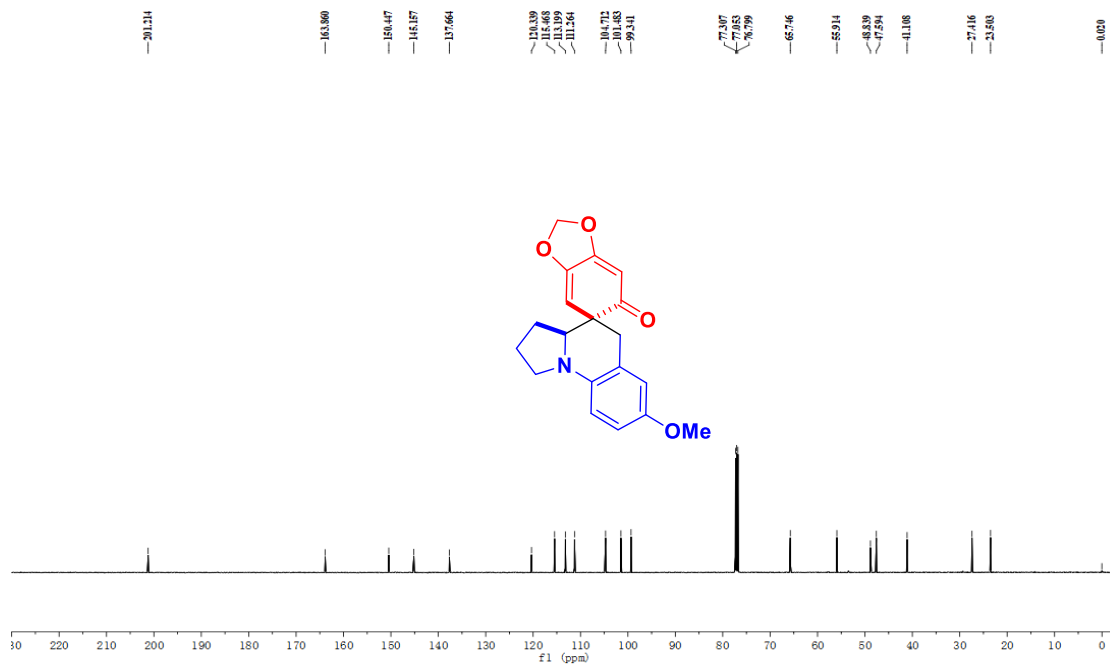

**7'-chloro-1',2',3',3a'-tetrahydro-5'H,6H-spiro[benzo[d][1,3]dioxole-5,4'-pyrrolo[1,2-a]quinolin]-6-one (3m)**

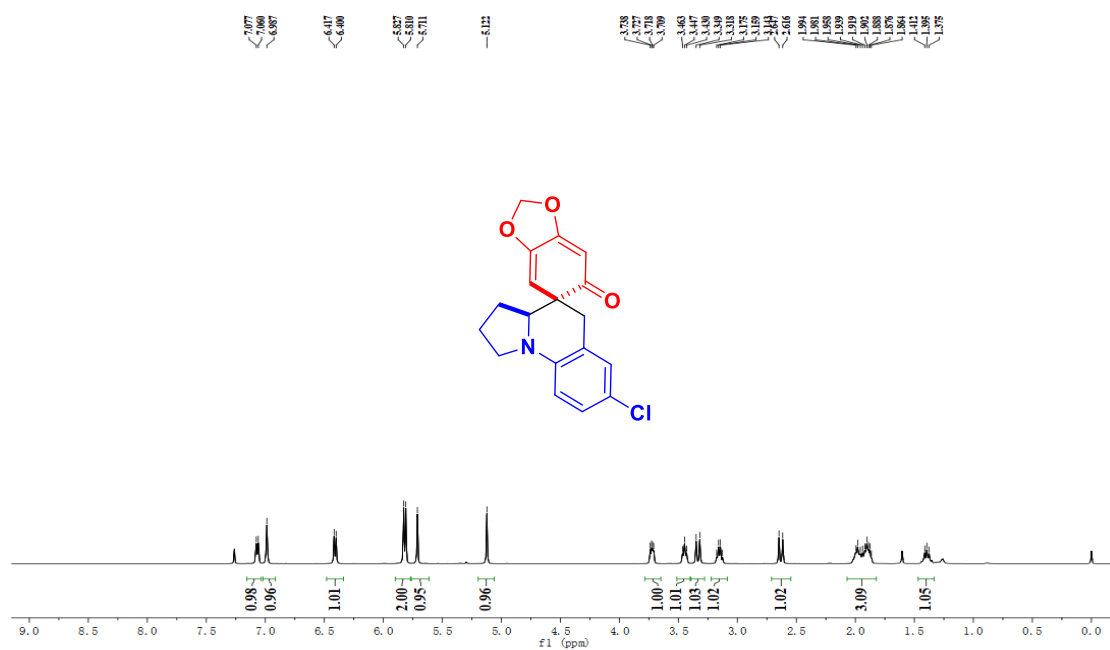

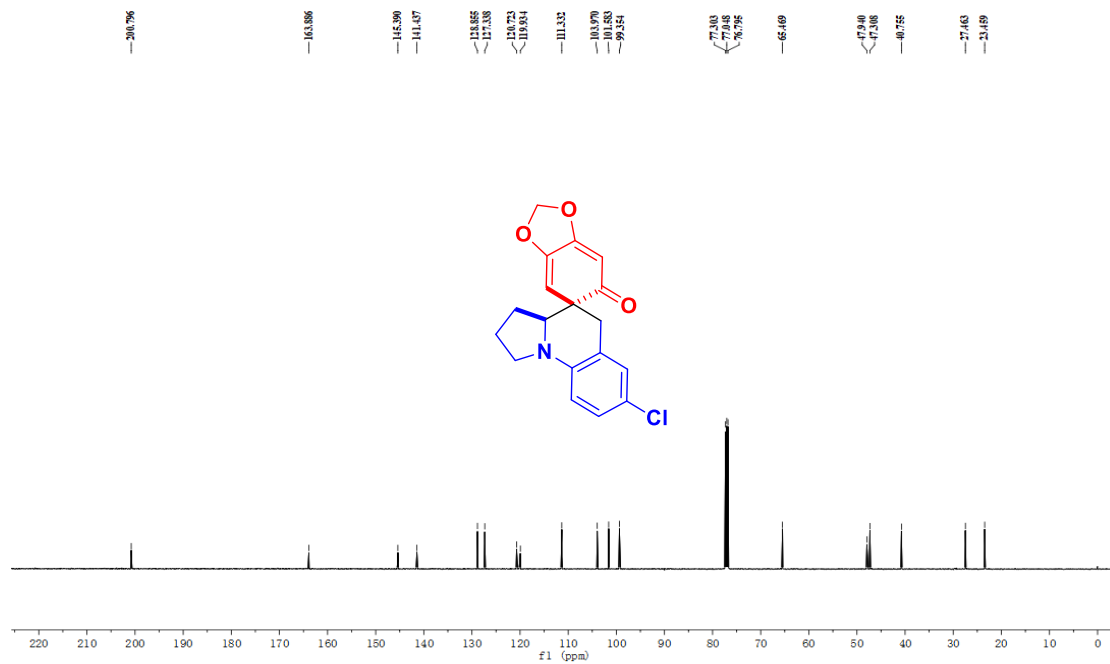

**7'-nitro-1',2',3',3a'-tetrahydro-5'H,6H-spiro[benzo[d][1,3]dioxole-5,4'-pyrrolo[1,2-a]quinolin]-6-one (3n)**

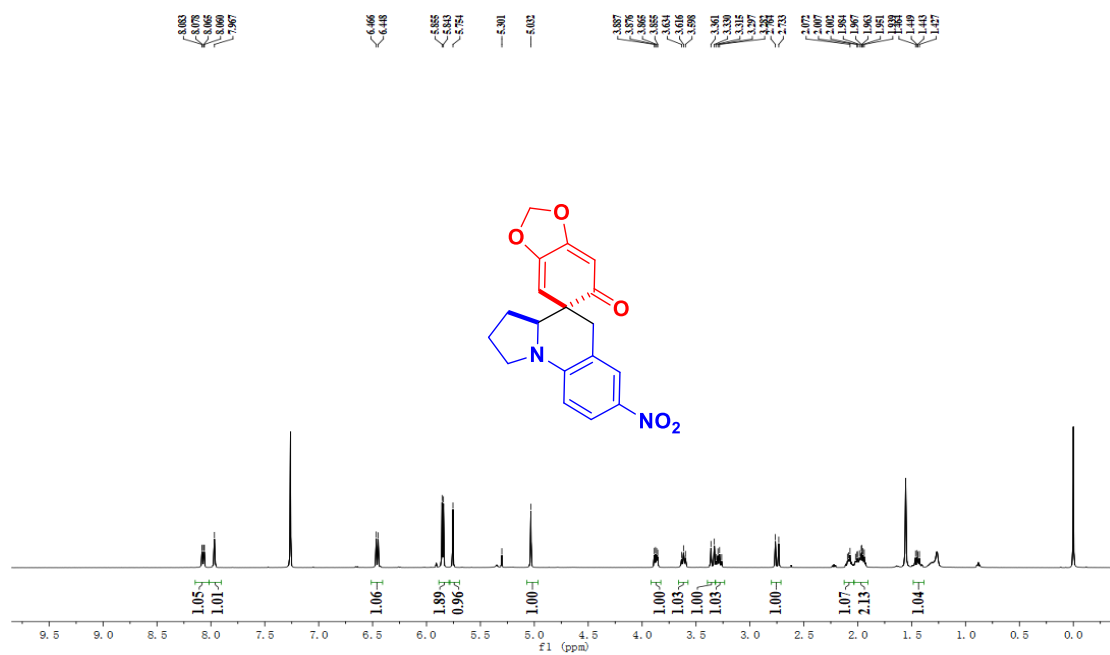

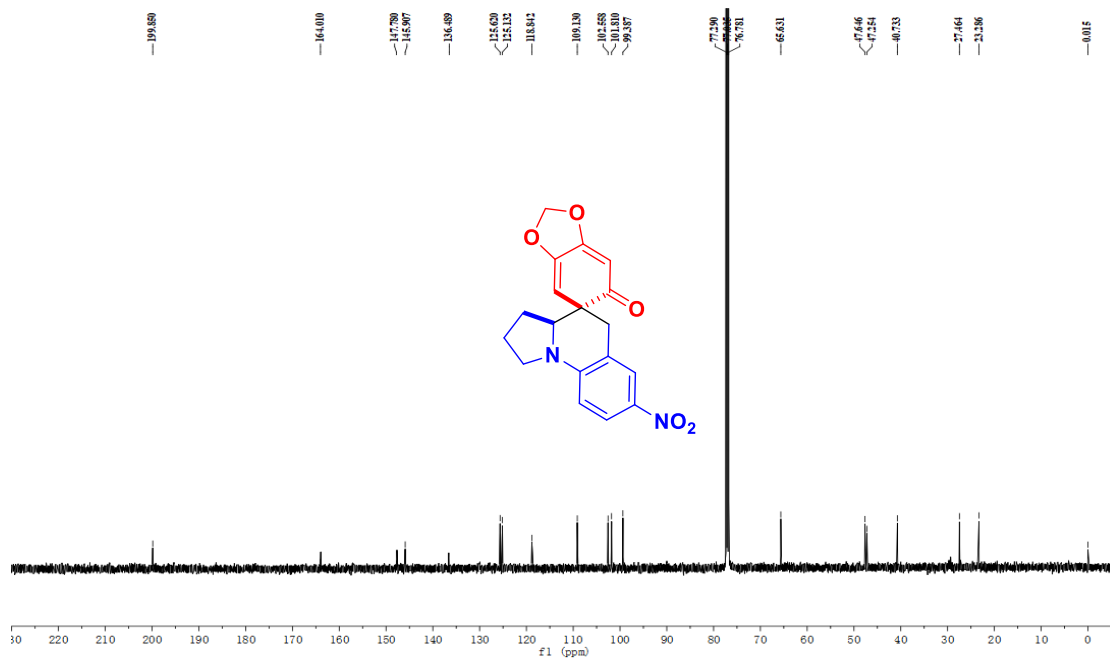

**6'-fluoro-1',2',3',3a'-tetrahydro-5'H,6H-spiro[benzo[d][1,3]dioxole-5,4'-pyrrolo[1,2-a]quinolin]-6-one (3o)**

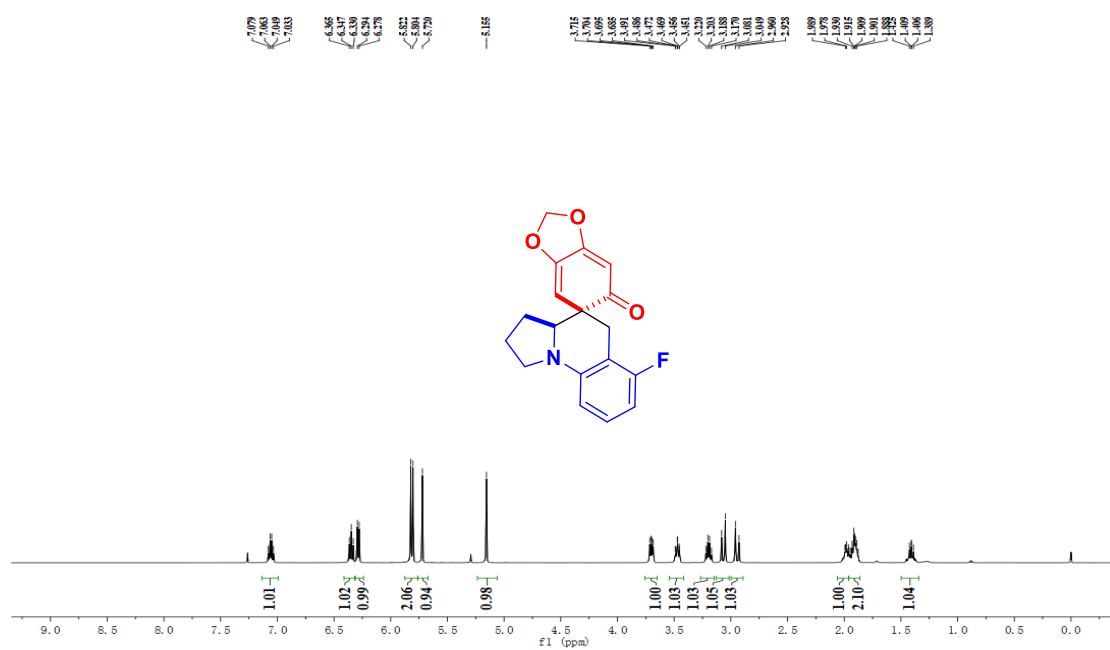



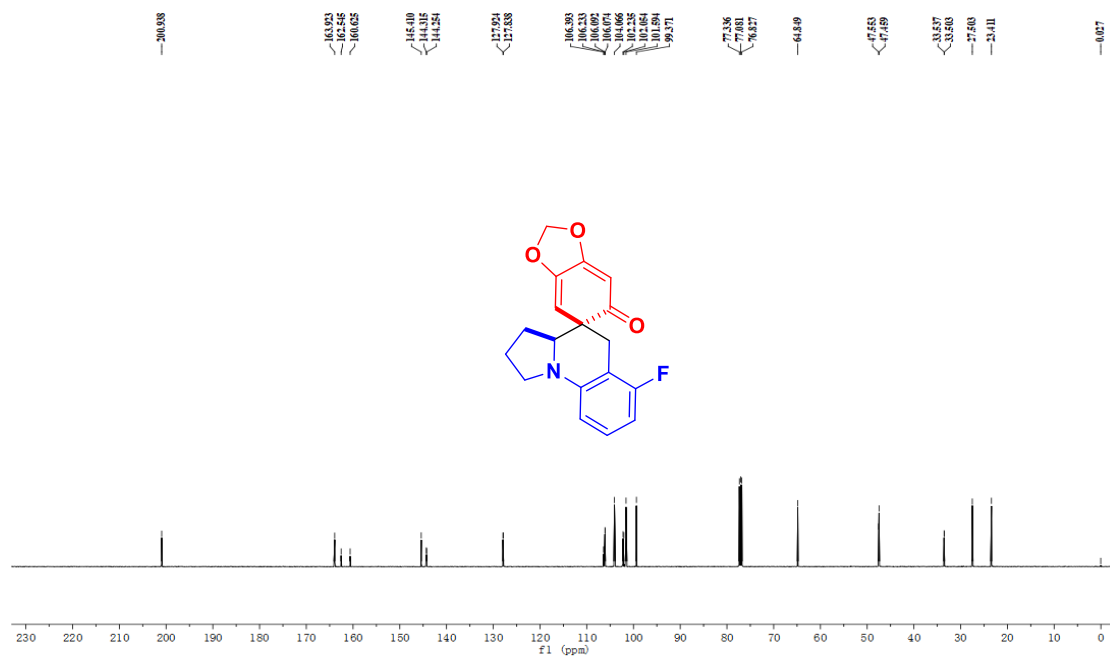

**6'-chloro-1',2',3',3a'-tetrahydro-5'H,6H-spiro[benzo[d][1,3]dioxole-5,4'-pyrrolo[1,2-a]quinolin]-6-one (3p)**

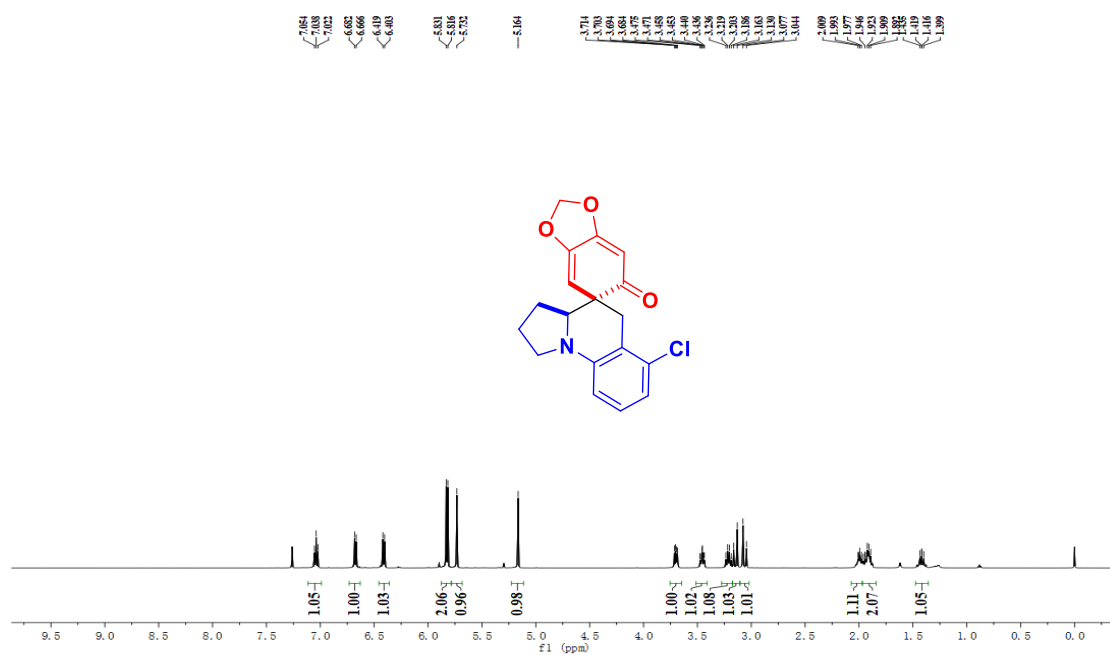

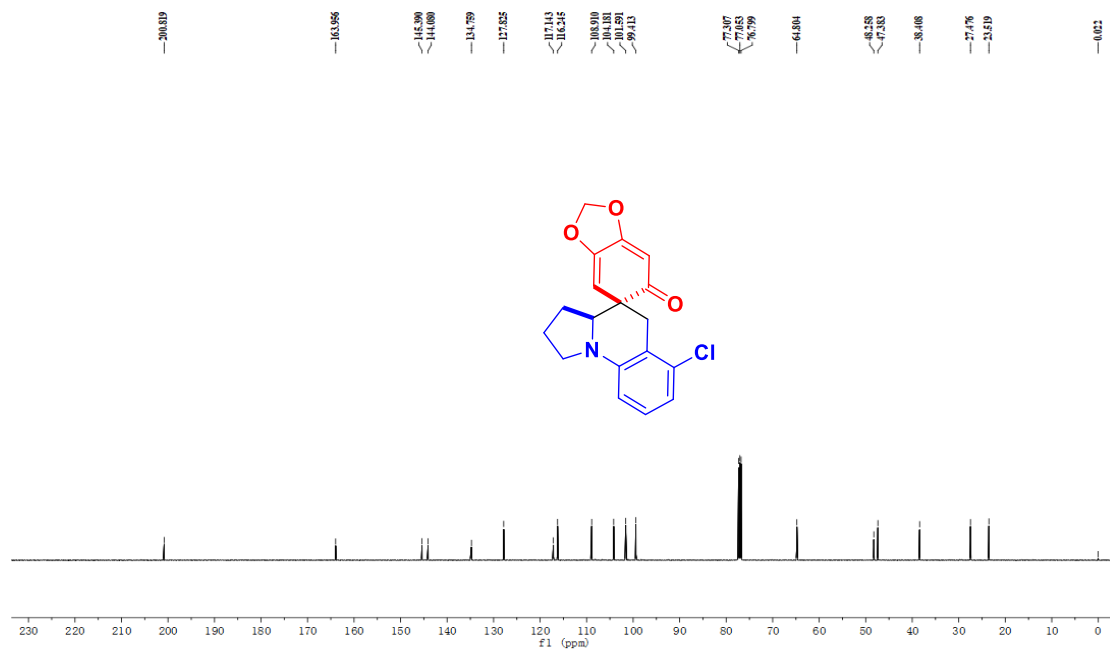

**6'-bromo-1',2',3',3a'-tetrahydro-5'H,6H-spiro[benzo[d][1,3]dioxole-5,4'-pyrrolo[1,2-a]quinolin]-6-one (3q)**

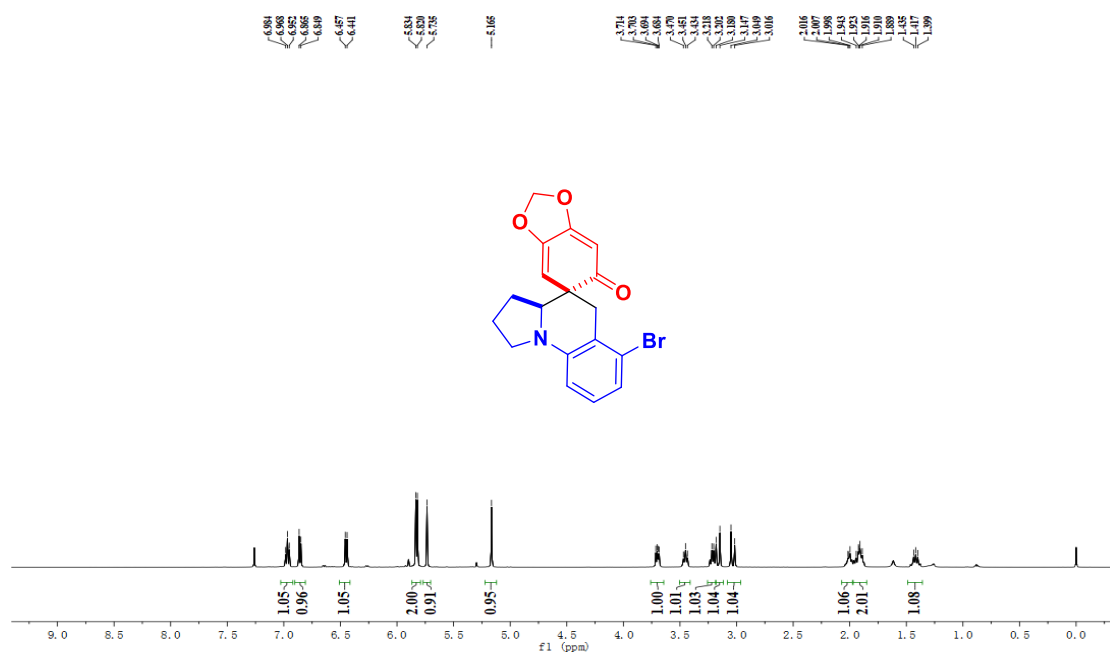

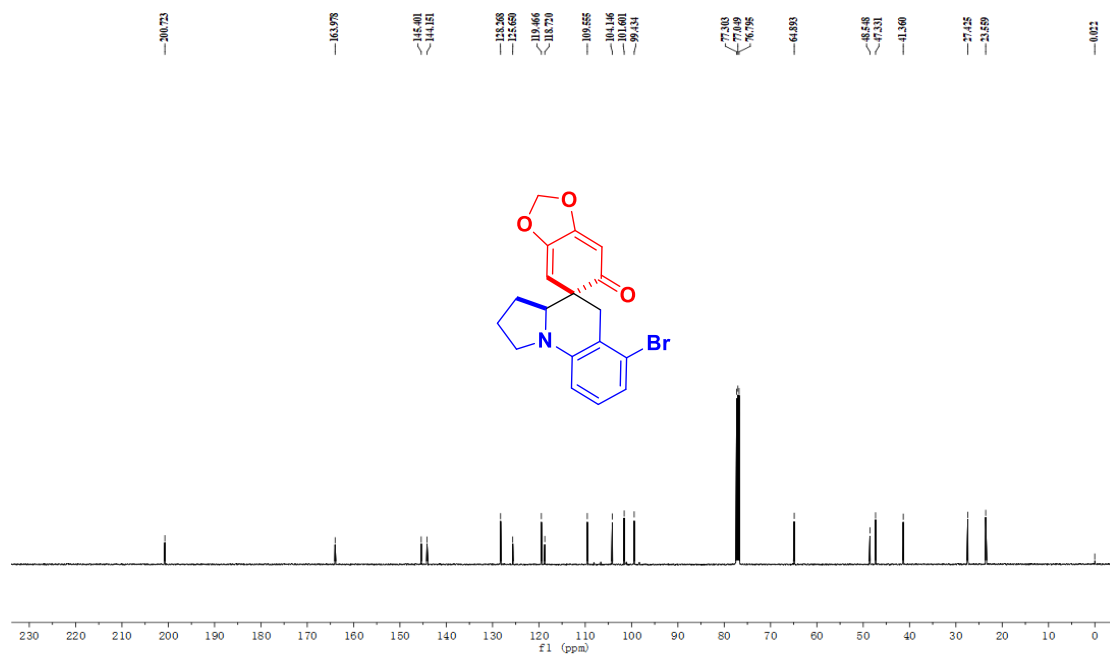

**6a',6b',7',8',9',10',10a',11'-octahydro-5'H,6H-spiro[benzo[d][1,3]dioxole-5,6'-isoindolo[2,1-a]quinolin]-6-one (3r)**

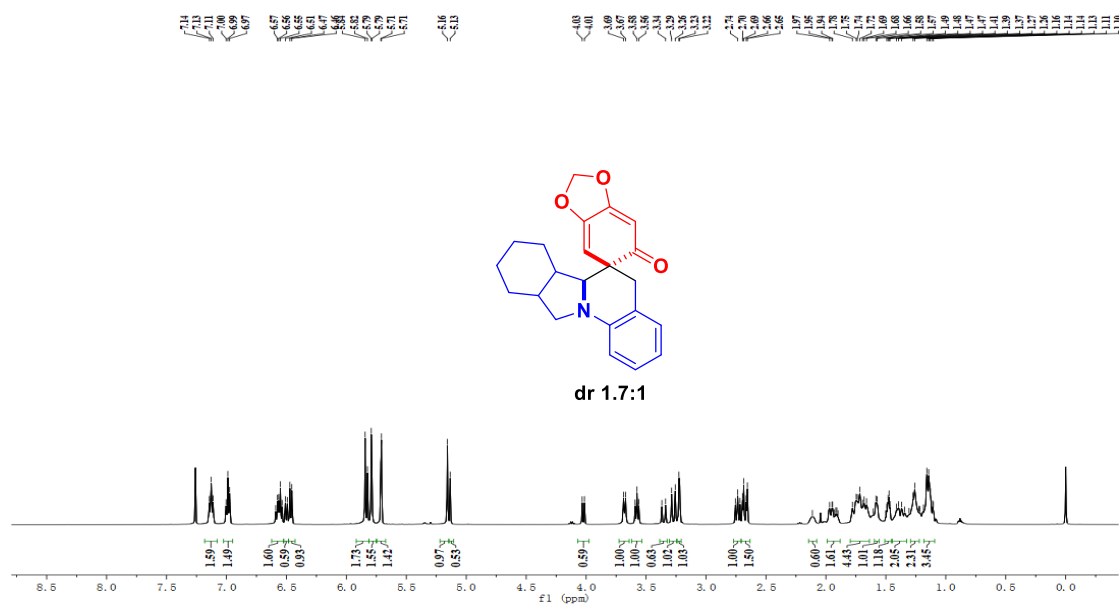

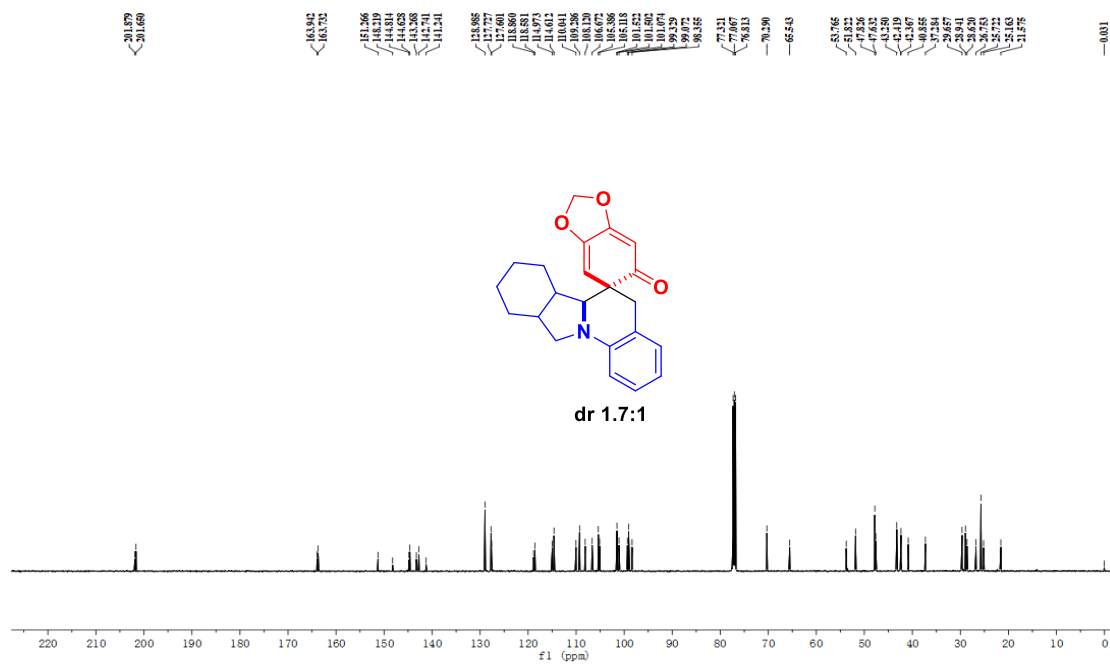

**7',11b'-dihydro-6H,6'H,13'H-spiro[benzo[d][1,3]dioxole-5,12'-isoquinolino[2,1-a]quinolin]-6-one (3s)**

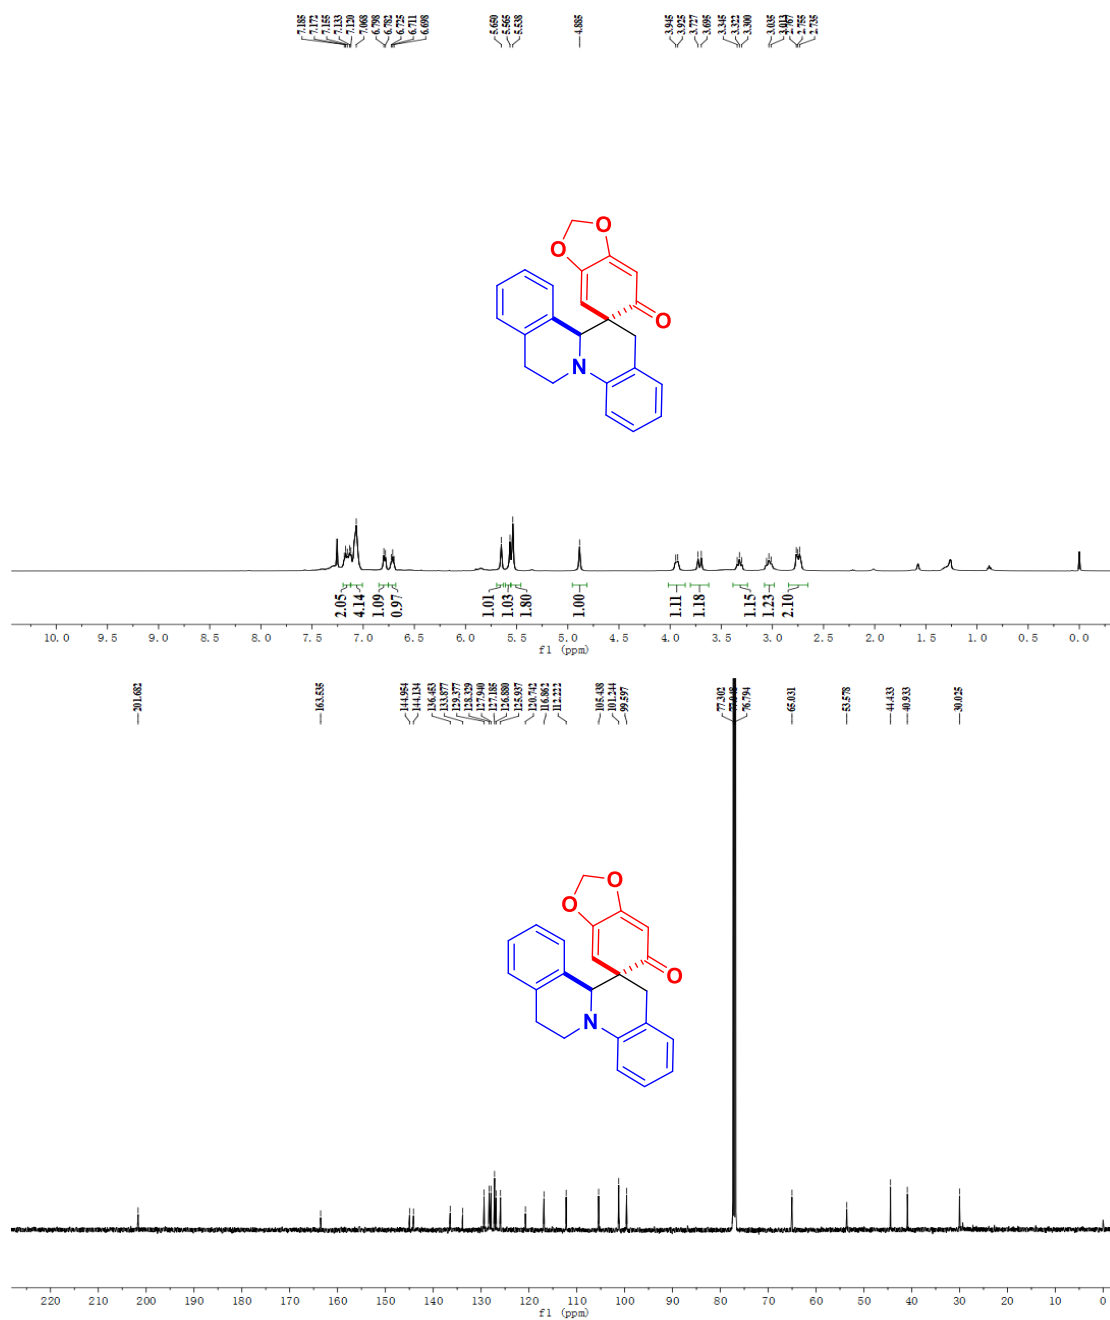

**1',2',3',3a'-tetrahydro-5'H,6H-spiro[benzo[d][1,3]dioxole-5,4'-benzo[g]pyrrolo[1,2-a][1,8]naphthyridin]-6-one (3t)**

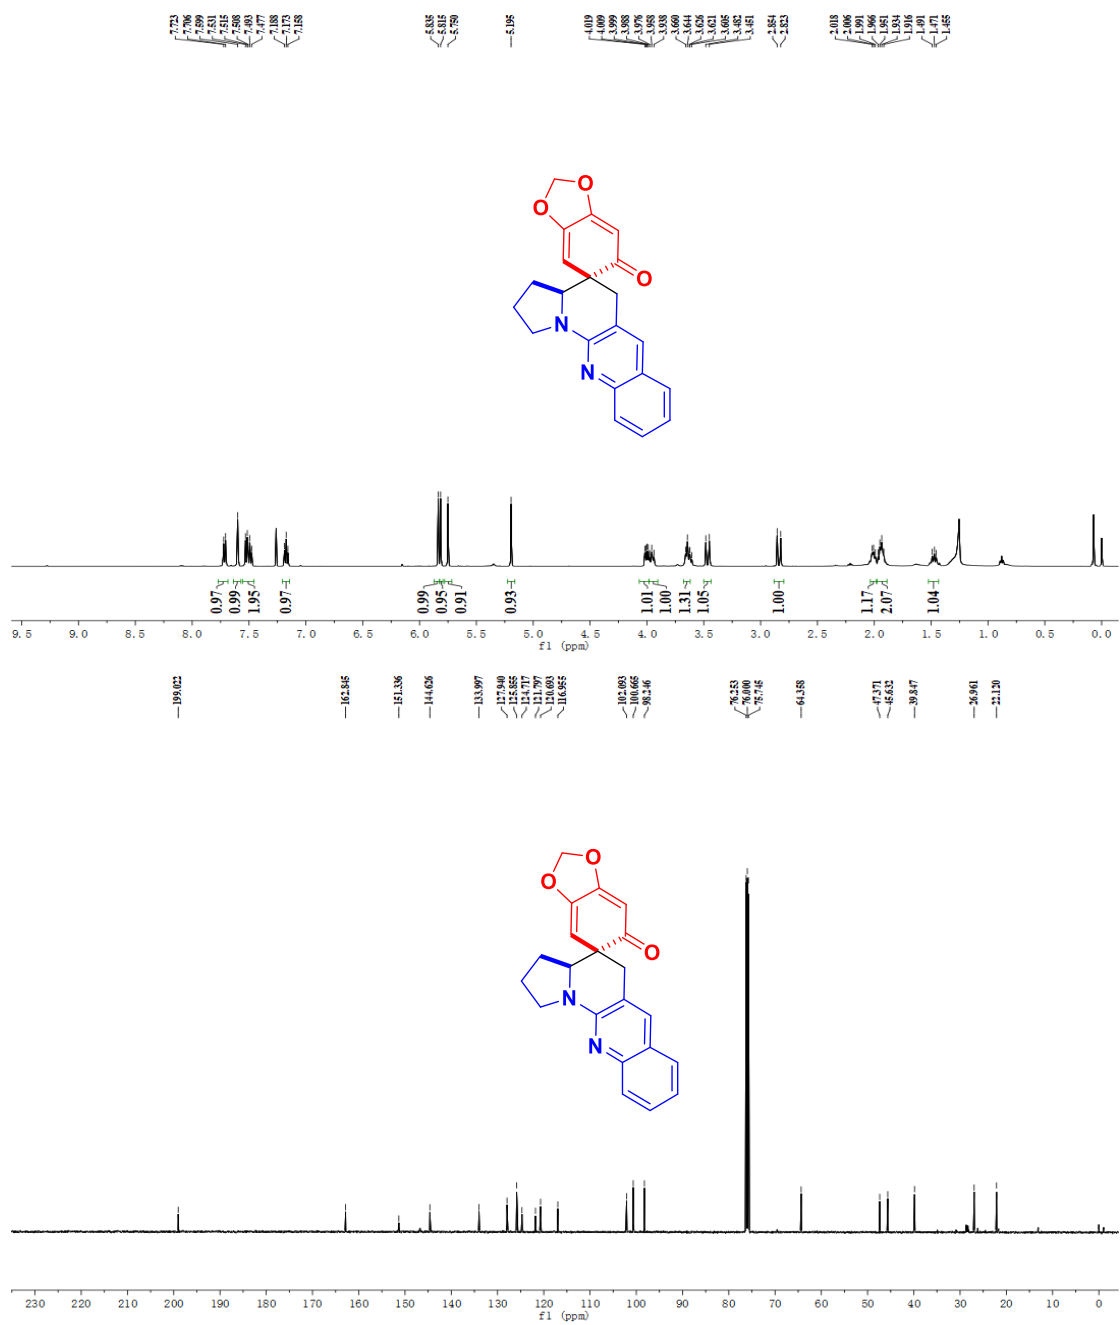

**1',2',3',12a'-tetrahydro-6H,11'H-spiro[benzo[d][1,3]dioxole-5,12'-naphtho[1,8-ef]pyrrolo[1,2-a]azepin]-6-one (3u)**

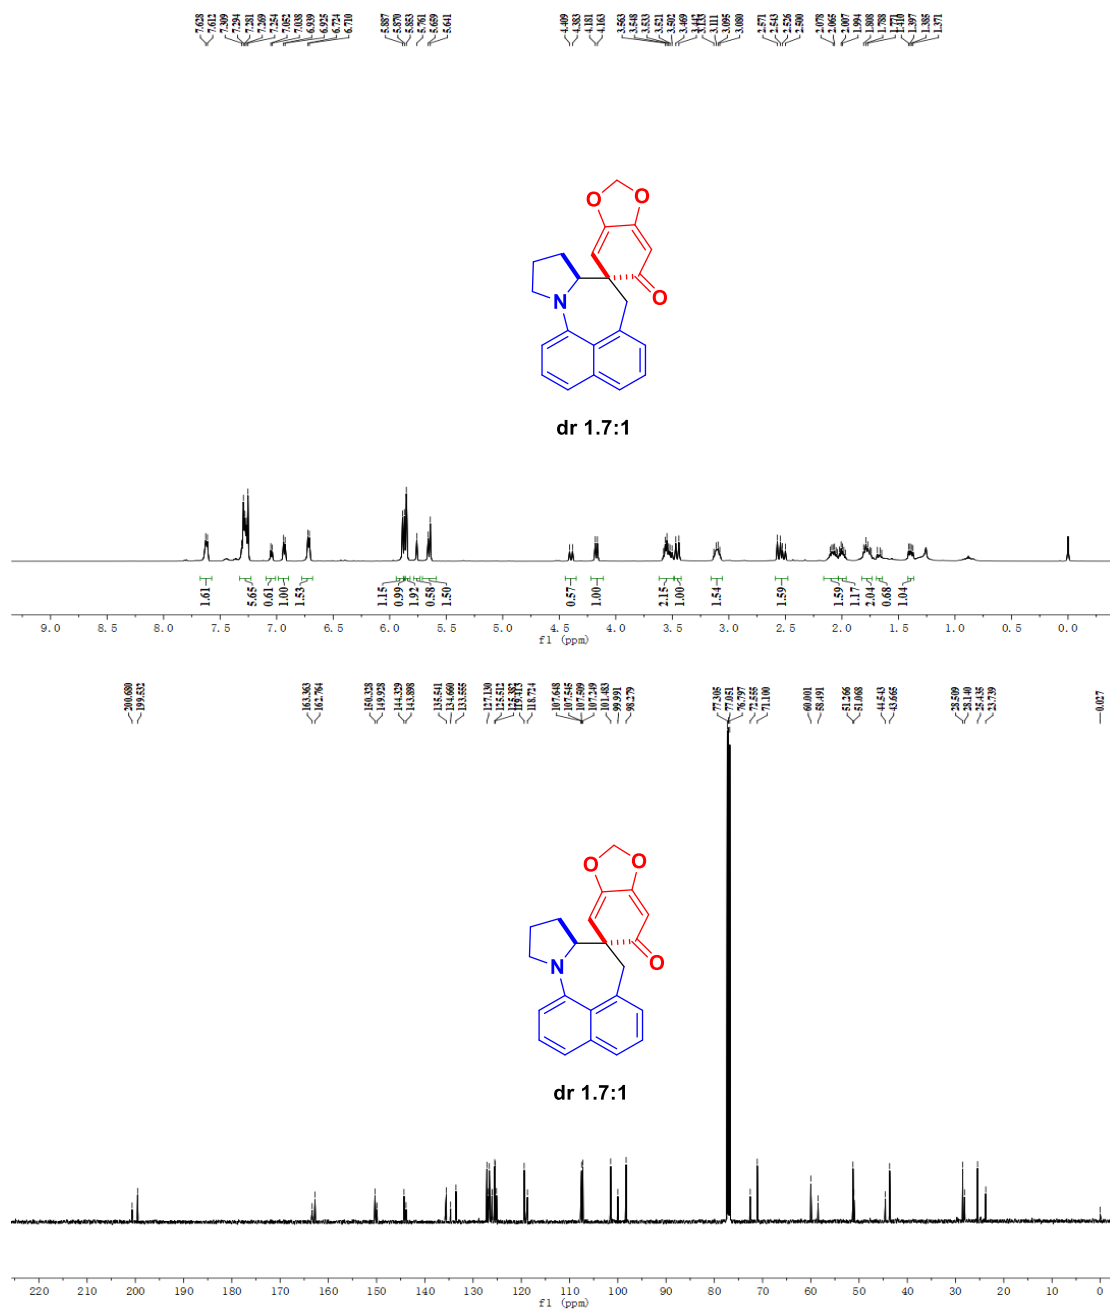

**4-methoxy-1',2',3',3a'-tetrahydro-5'H-spiro[cyclohexane-1,4'-pyrrolo[1,2-a]quinoline]-2,4-dien-6-one (3v)**

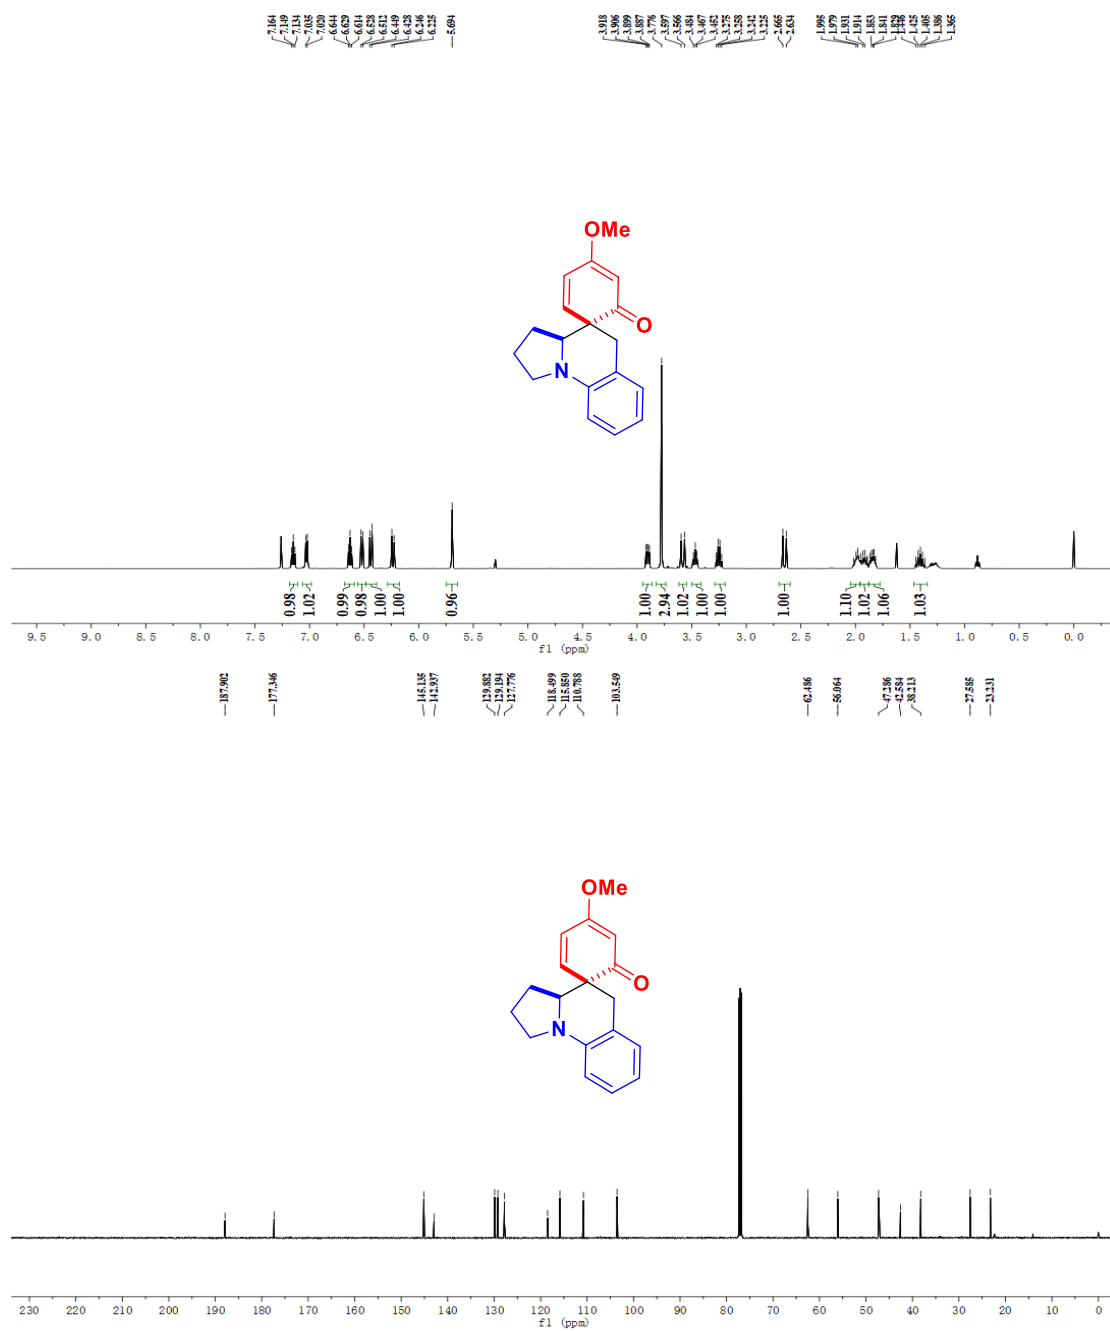

**3,4-dimethoxy-1',2',3',3a'-tetrahydro-5'H-spiro[cyclohexane-1,4'-pyrrolo[1,2-a]quinoline]-2,4-dien-6-one (3w)**



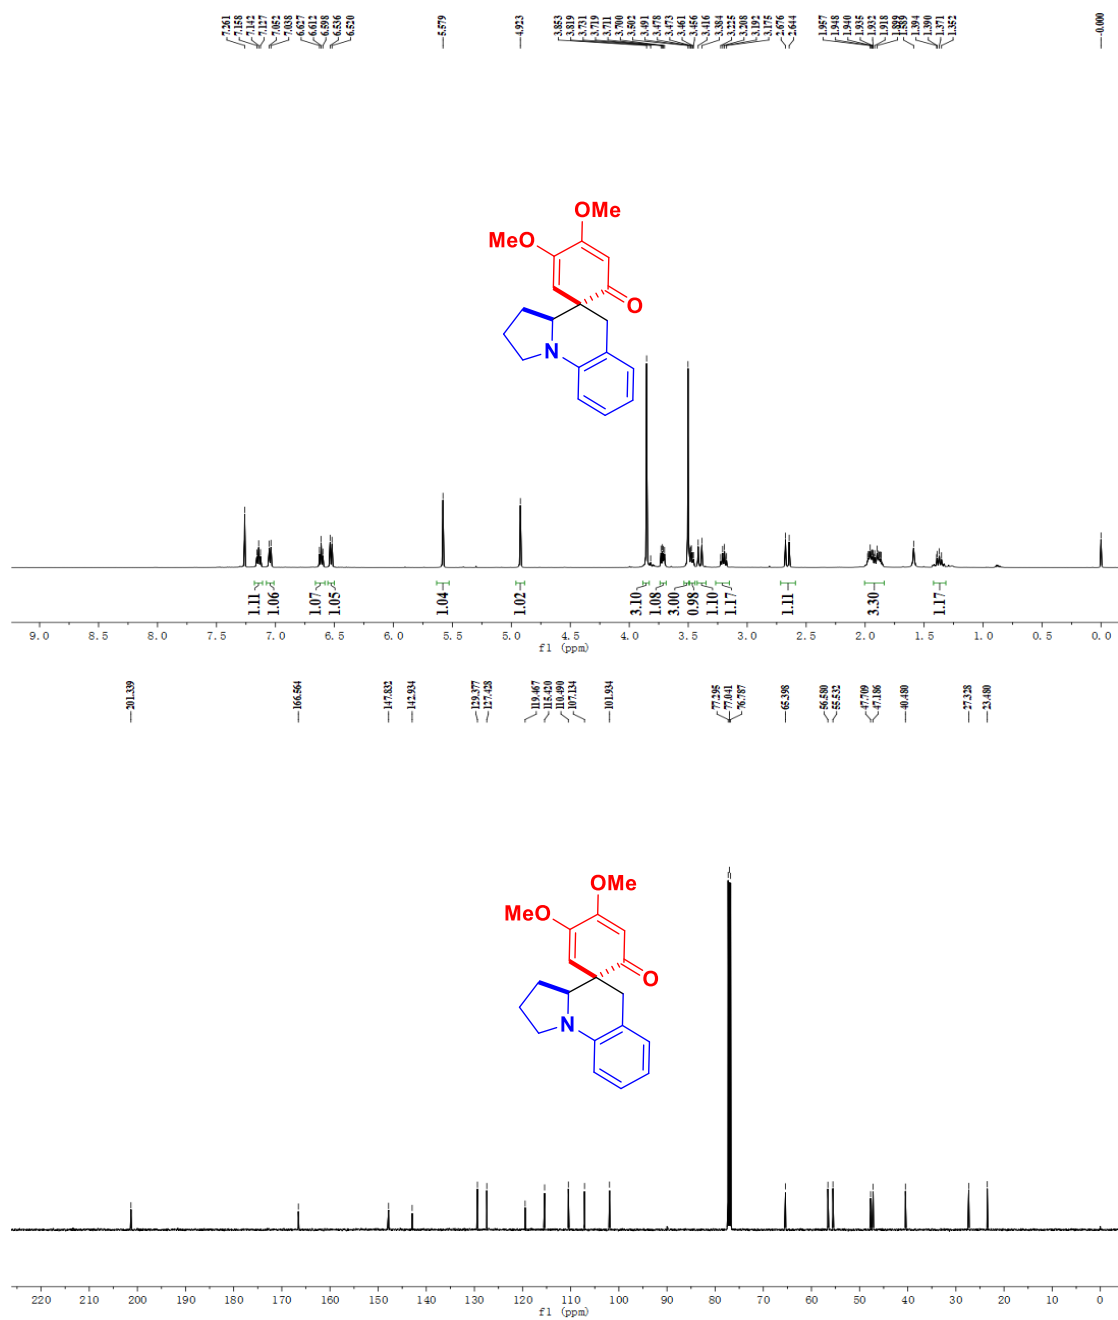

**2,4-dimethoxy-1',2',3',3a'-tetrahydro-5'H-spiro[cyclohexane-1,4'-pyrrolo[1,2-a]quinoline]-2,4-dien-6-one (3x)**

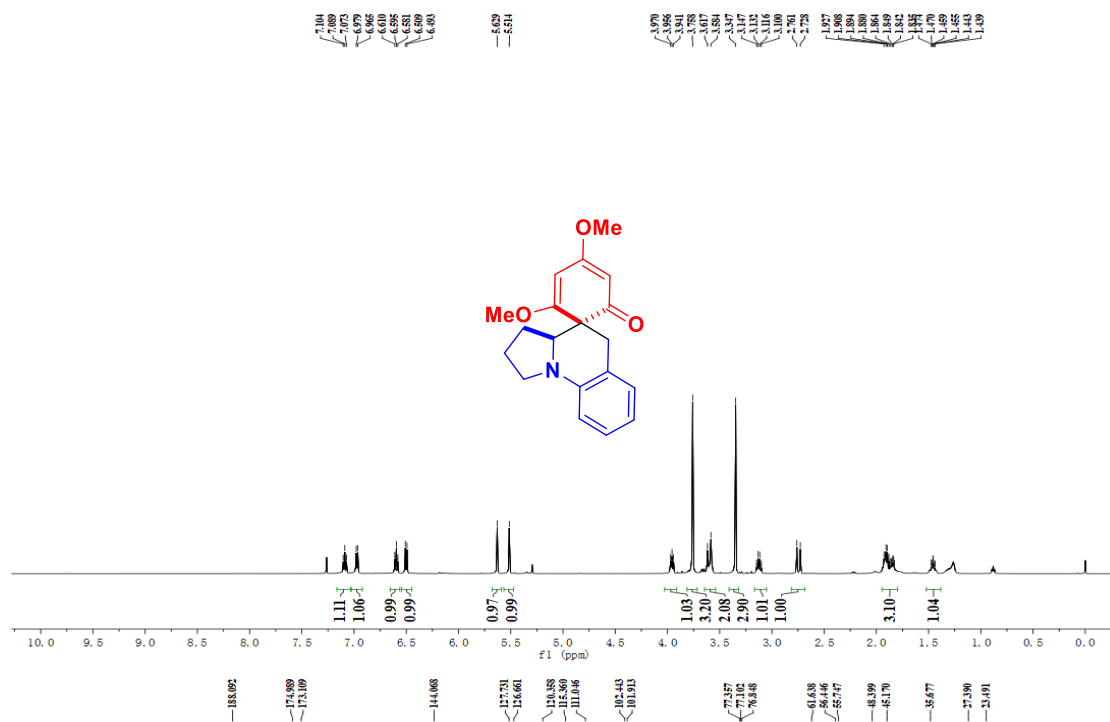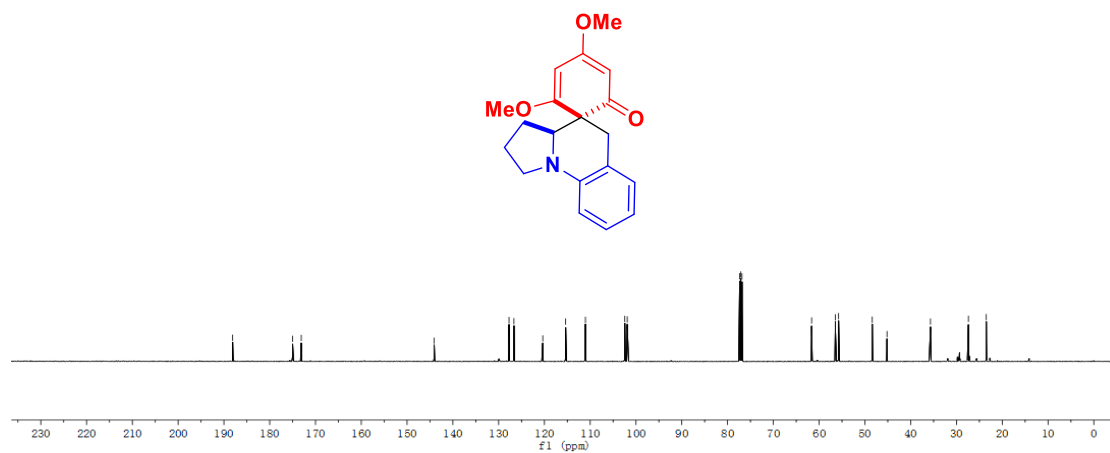

**4-(diethylamino)-1',2',3',3a'-tetrahydro-5'H-spiro[cyclohexane-1,4'-pyrrolo[1,2-a]quinoline]-2,4-dien-6-one (3y)**

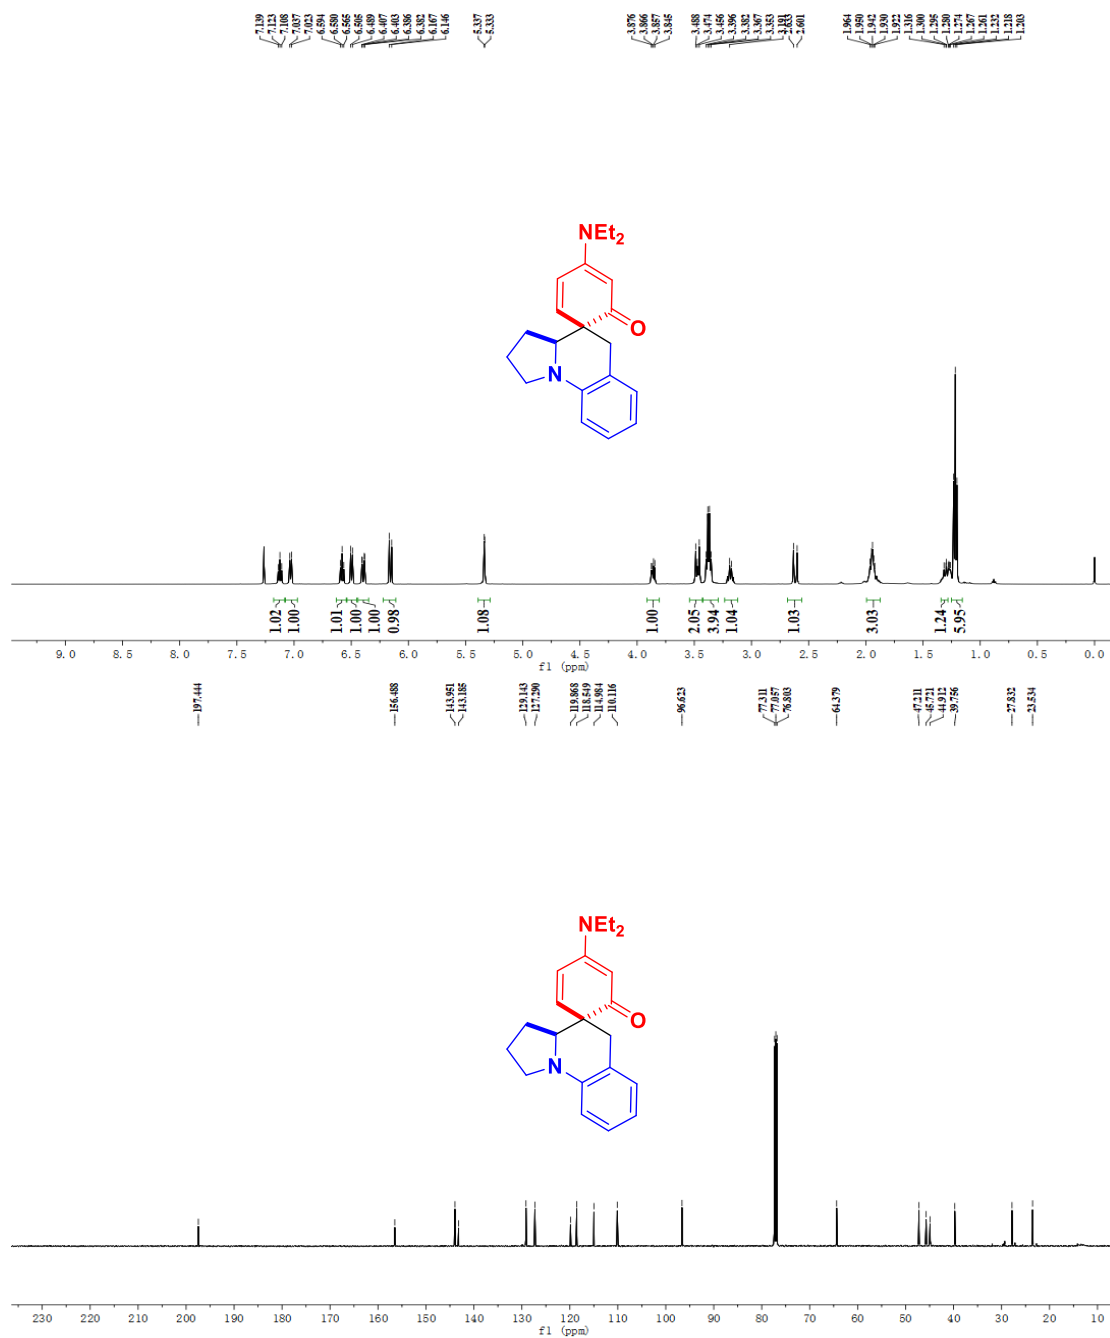

**4-(pyrrolidin-1-yl)-1',2',3',3a'-tetrahydro-5'H-spiro[cyclohexane-1,4'-pyrrolo[1,2-a]quinoline]-2,4-dien-6-one (3z)**

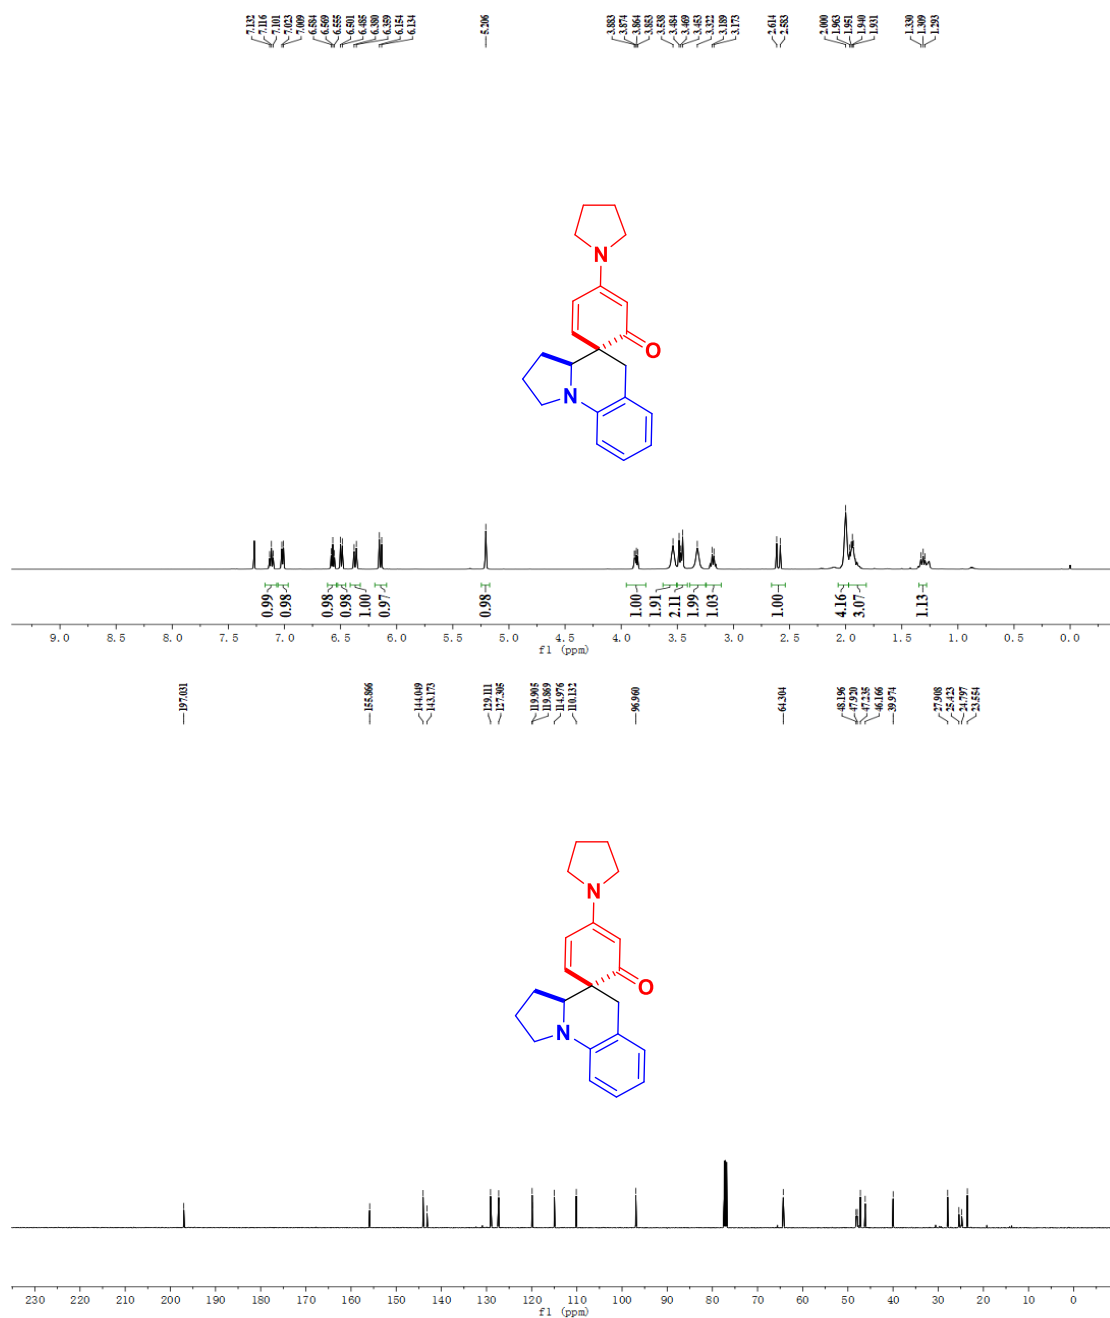

**4-(piperidin-1-yl)-1',2',3',3a'-tetrahydro-5'*H*-spiro[cyclohexane-1,4'-pyrrolo[1,2-*a*]quinoline]-2,4-dien-6-one (3za)**

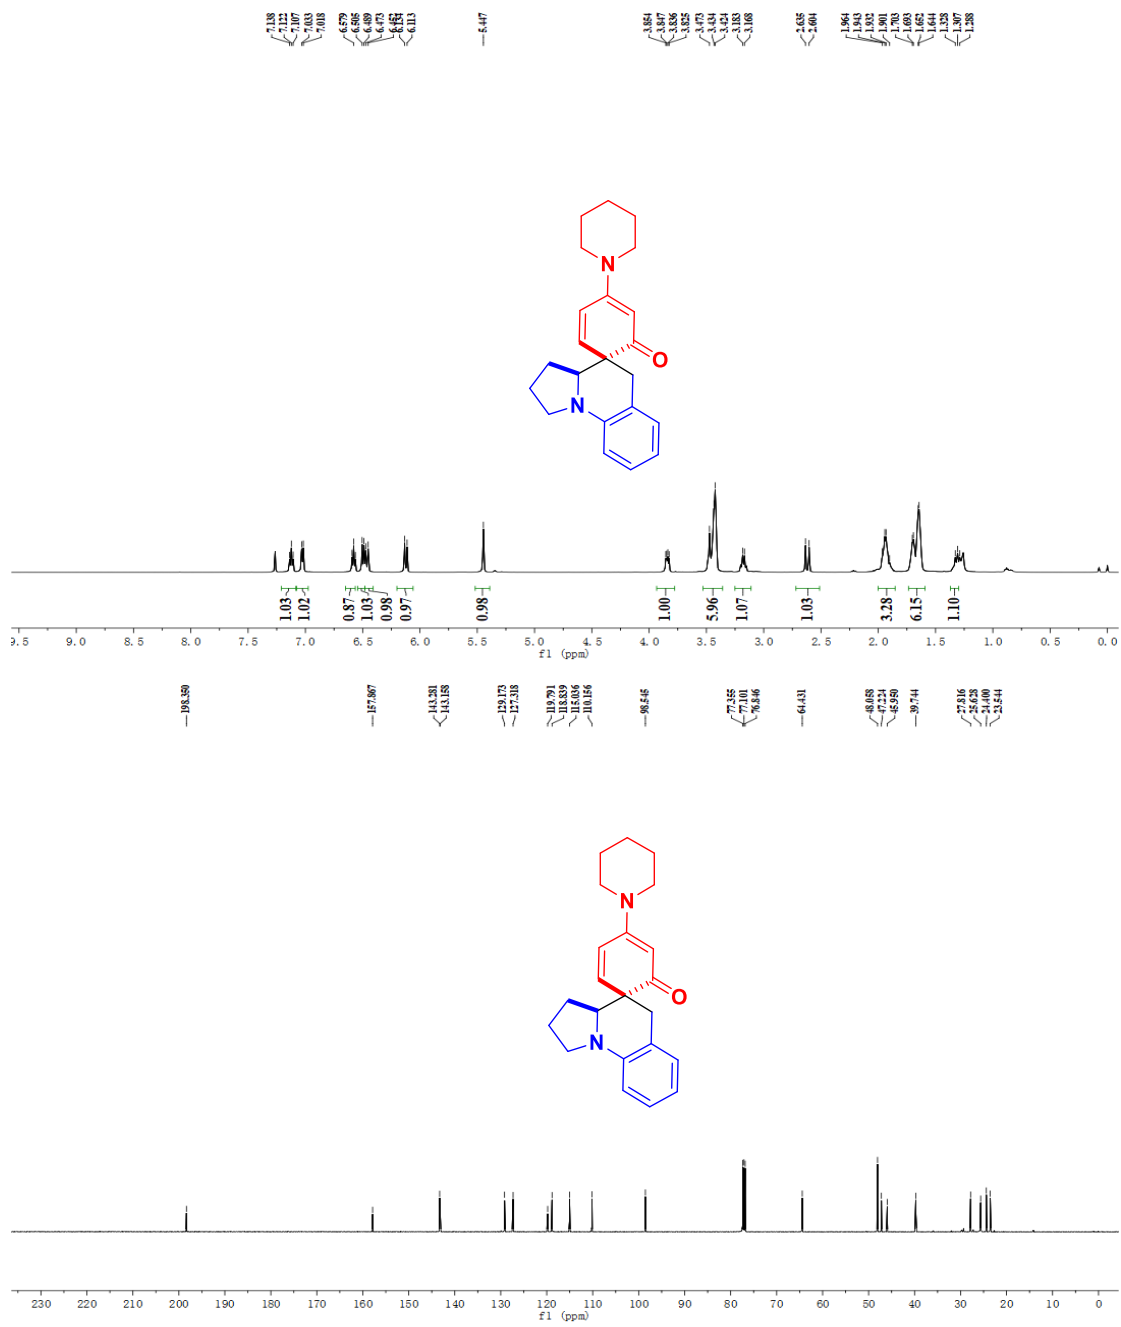

**1',2',3',3a'-tetrahydro-1H,5'H-spiro[naphthalene-2,4'-pyrrolo[1,2-a]quinolin]-1-one (3zb)**

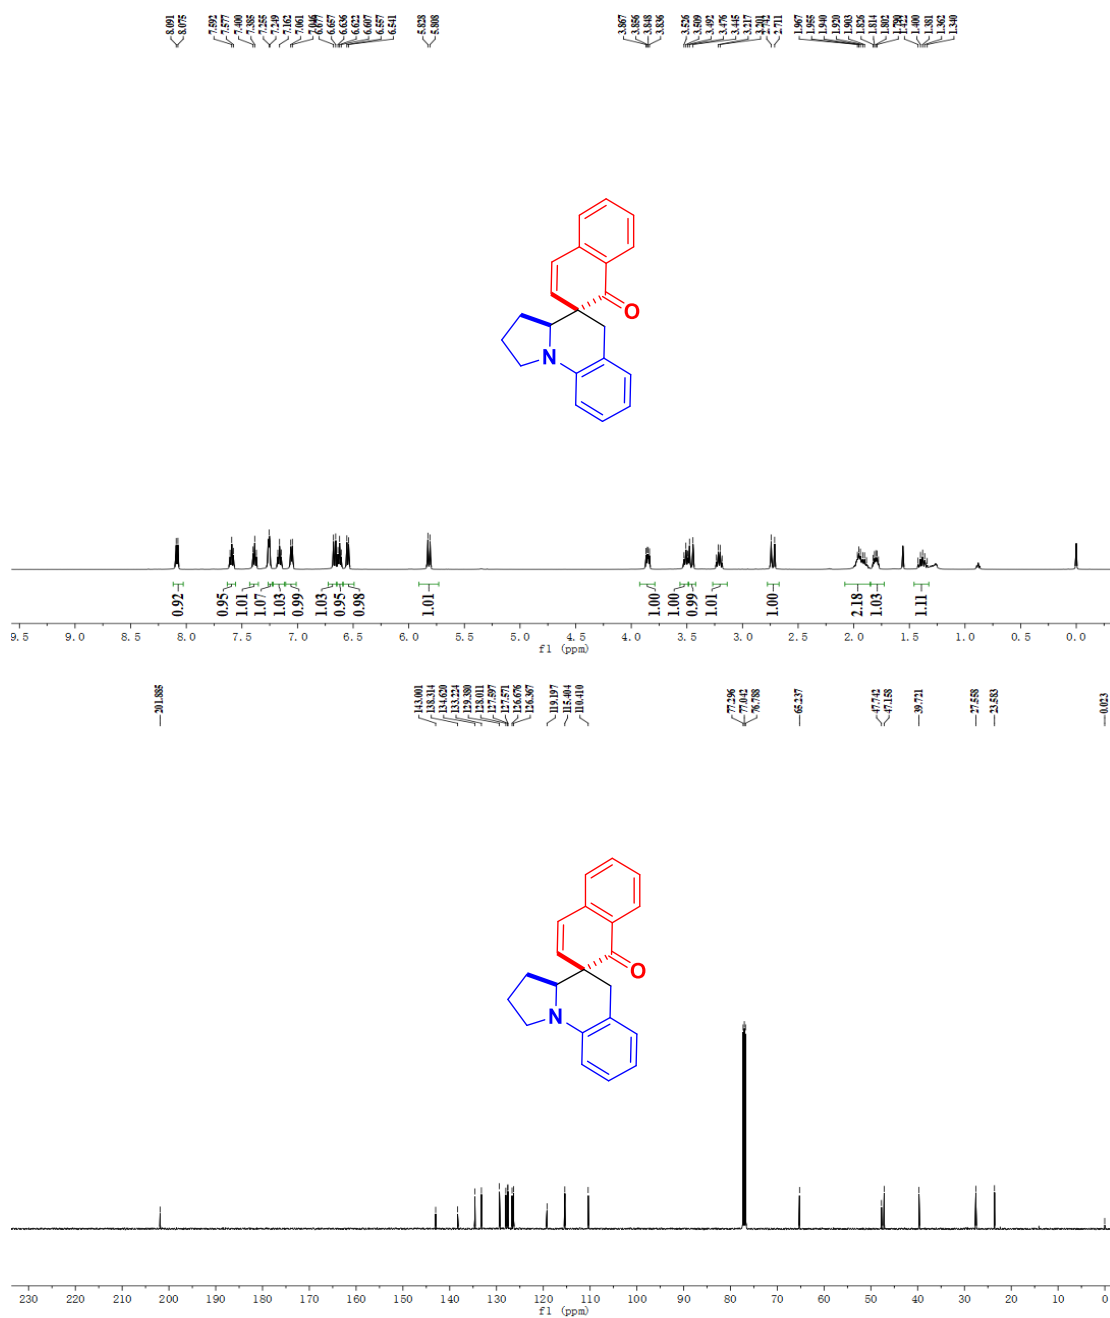

**4-chloro-2',3',3a',5'-tetrahydro-1H,1'H-spiro[naphthalene-2,4'-pyrrolo[1,2-a]quinolin]-1-one (3zc)**

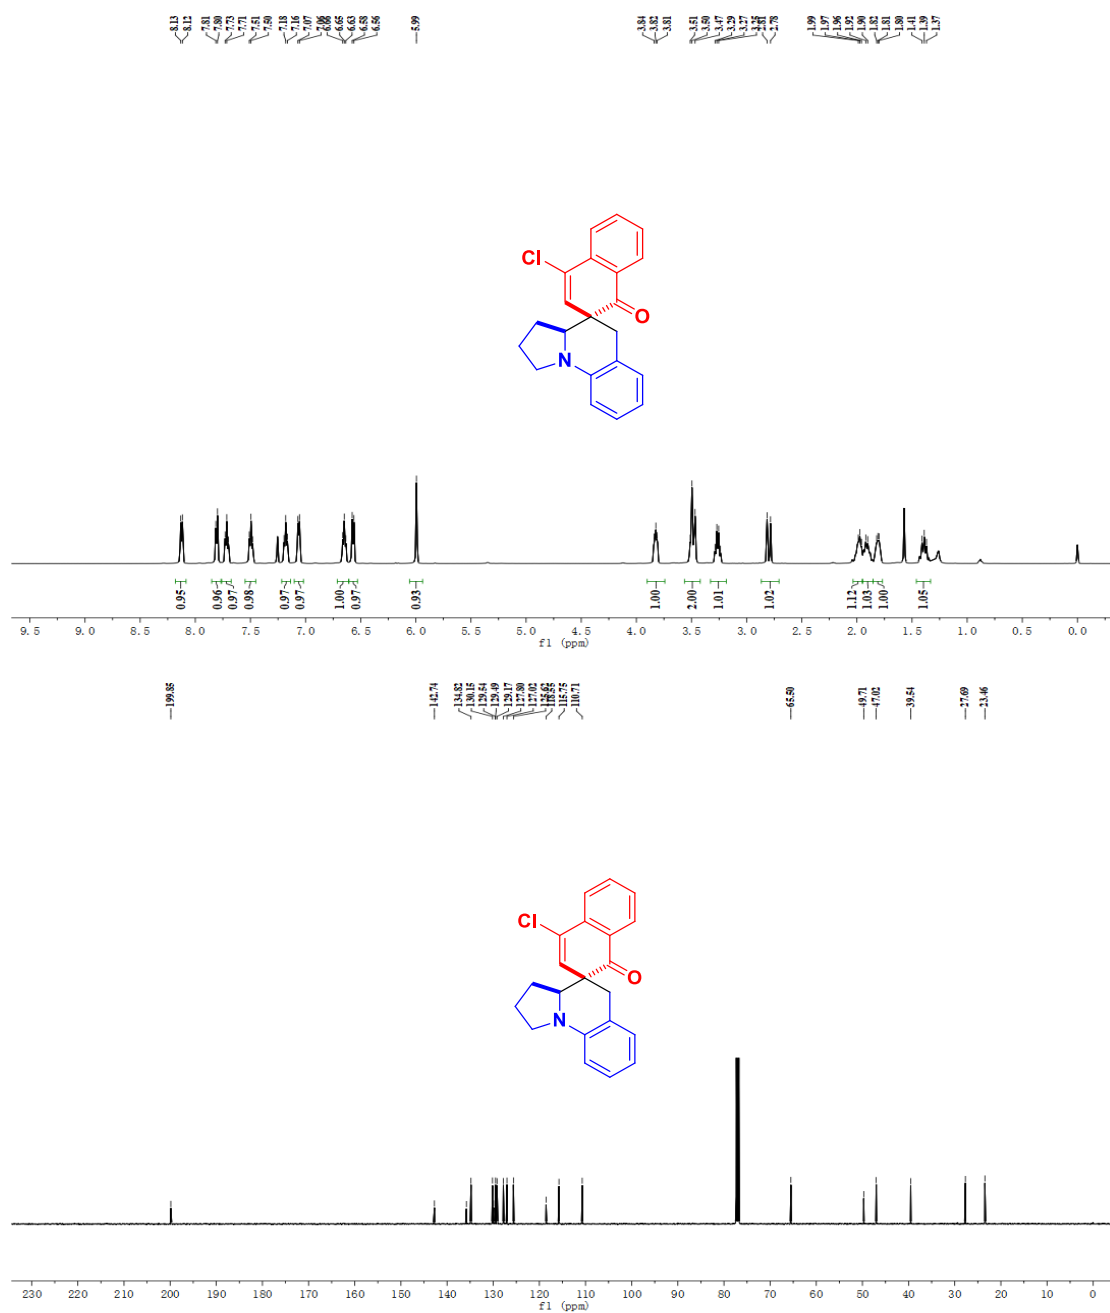

**3-hydroxy-1',2',3',3a'-tetrahydro-2H,5'H-spiro[naphthalene-1,4'-pyrrolo[1,2-a]quinolin]-2-one (3zd)**

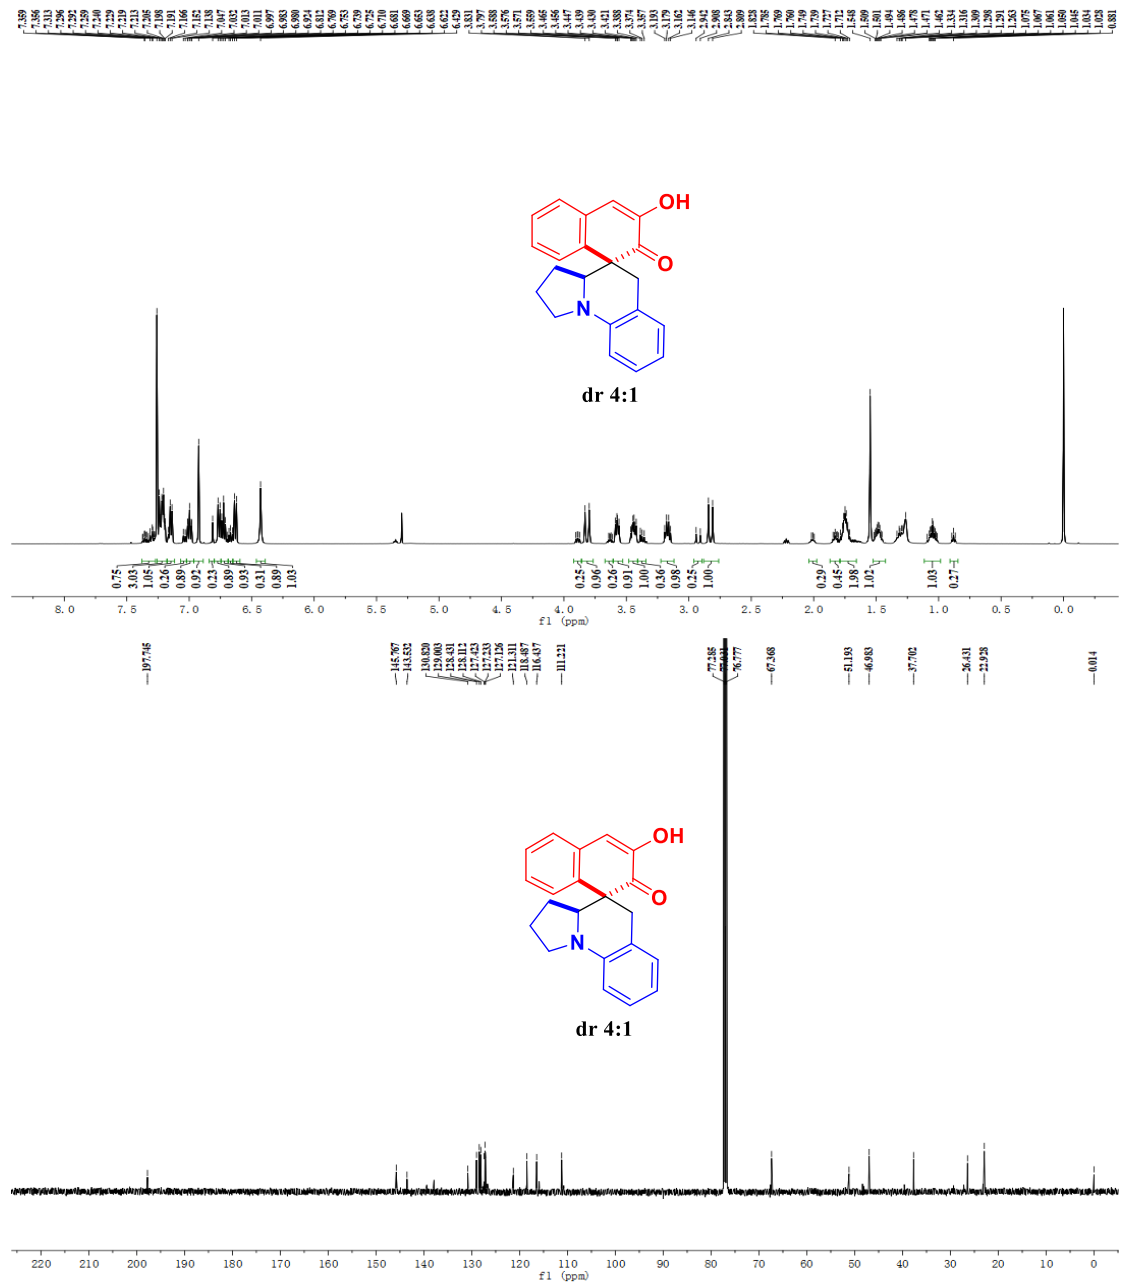

3a1',8a',9',10',11',12a'-hexahydro-1*H*,7'*H*-spiro[naphthalene-2,8'-naphtho[1,8-*ef*]pyrrolo[1,2-*a*]azepin]-1-one (3ze)



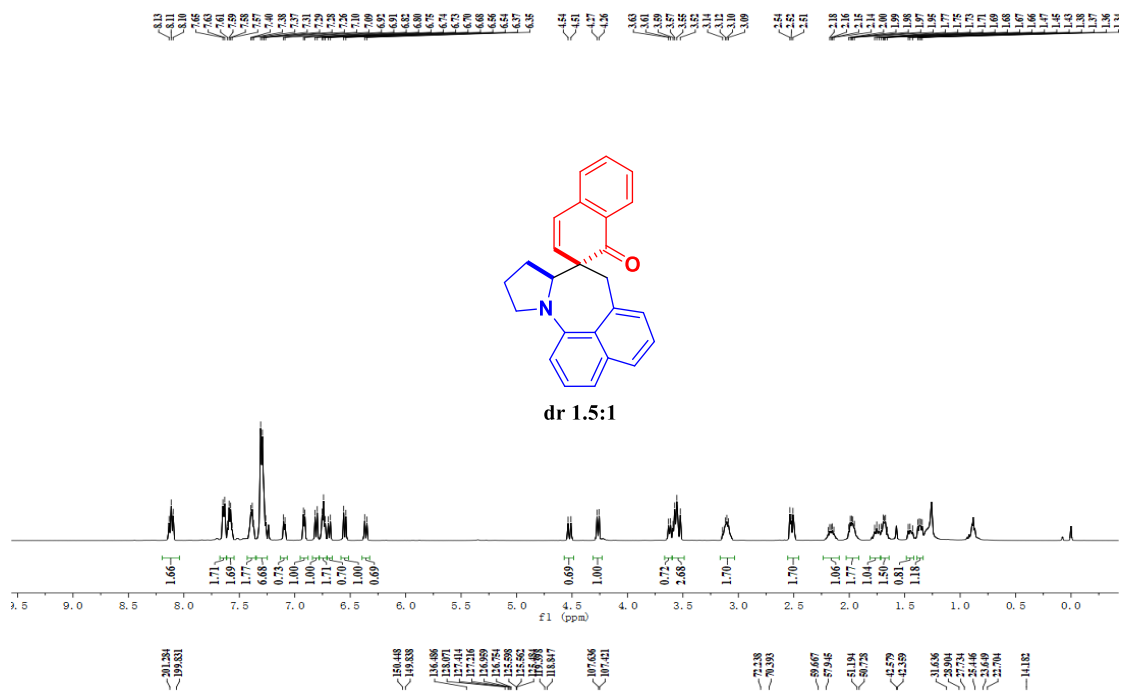

**3,5-di-*tert*-butyl-1',2',3',3a'-tetrahydro-5H-spiro[cyclohexane-1,4'-pyrrolo[1,2-a]quinoline]-2,5-dien-4-one (5a)**

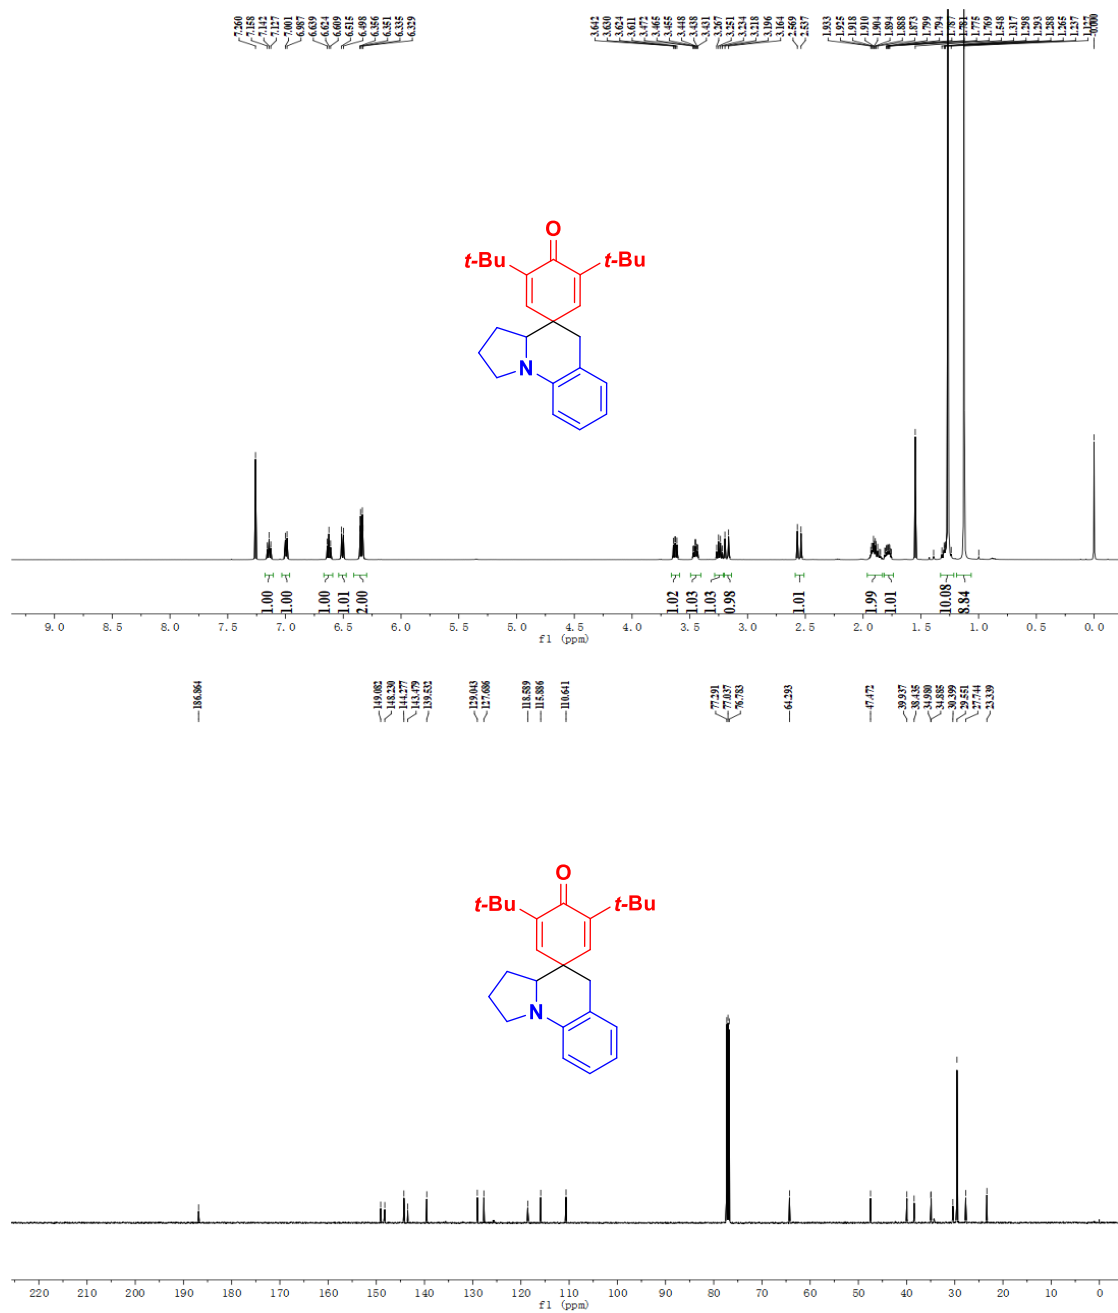

**(R)-3,5-di-tert-butyl-8'-methyl-1',2',3',3a'-tetrahydro-5'H-spiro[cyclohexane-1,4'-pyrrolo[1,2-a]quinoline]-2,5-dien-4-one (5b)**

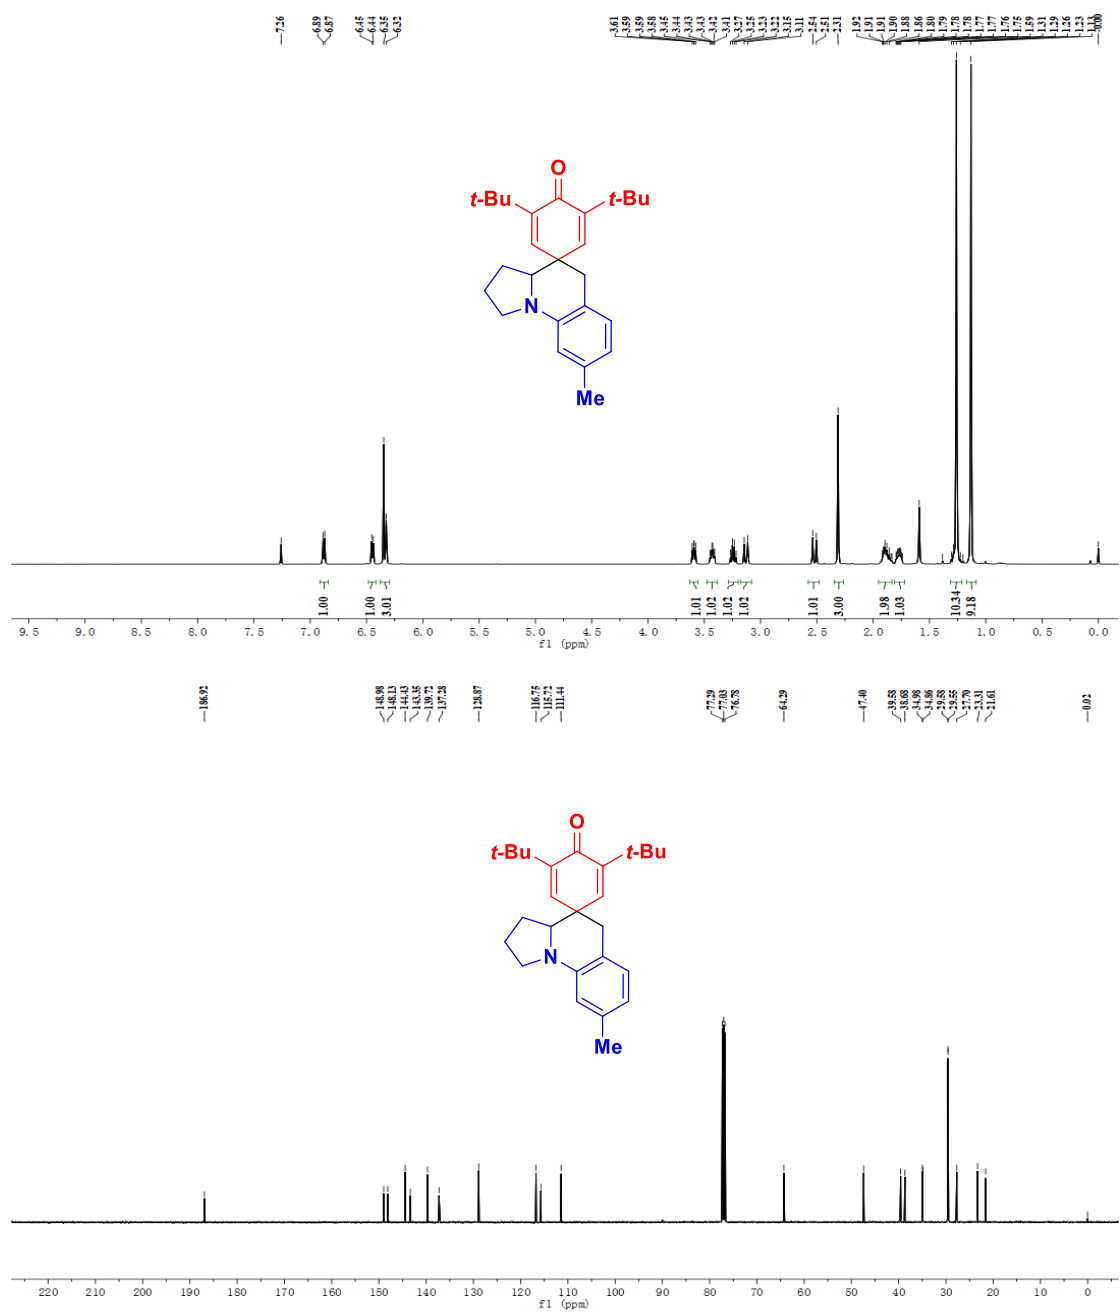

**8'-bromo-3,5-di-*tert*-butyl-1',2',3',3a'-tetrahydro-5'H-spiro[cyclohexane-1,4'-pyrrolo[1,2-a]quinoline]-2,5-dien-4-one (5c)**

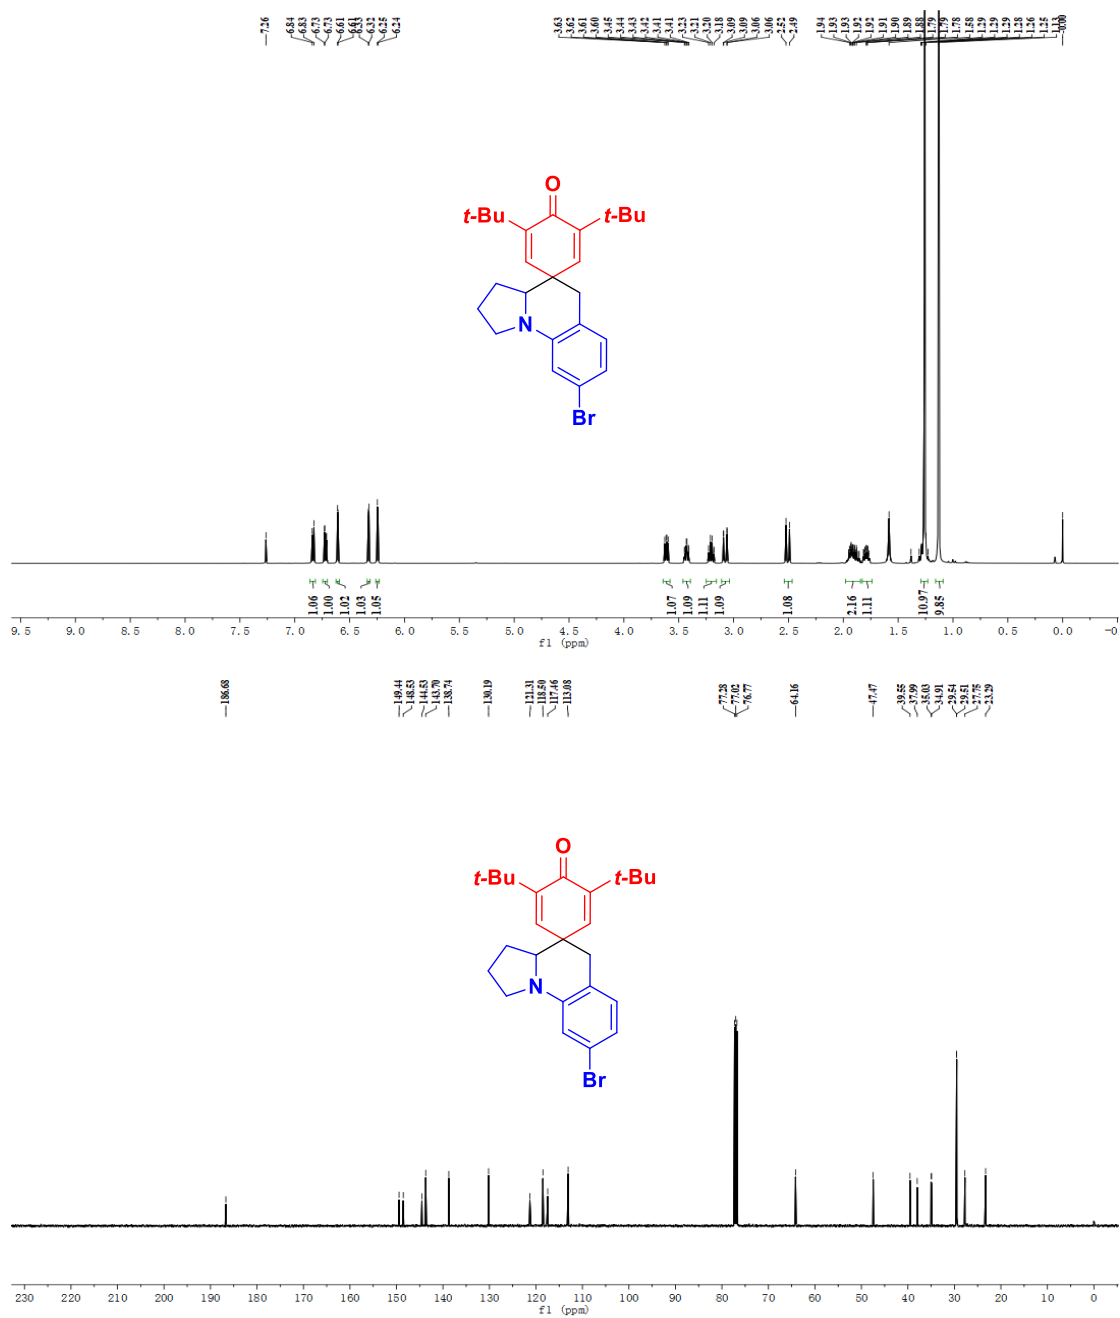

**methyl(*E*)-3-(3,5-di-*tert*-butyl-4-oxo-1',2',3',3a'-tetrahydro-5'*H*-spiro[cyclohexane-1,4'-pyrrolo[1,2-*a*]quinoline]-2,5-dien-8'-yl)acrylate (5d)**

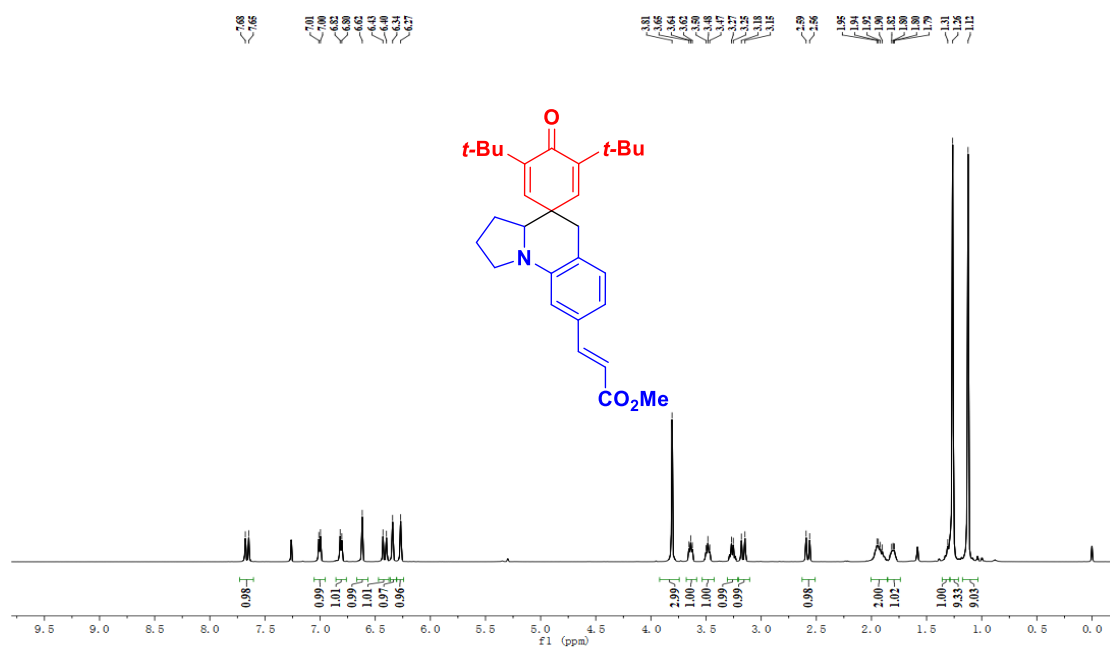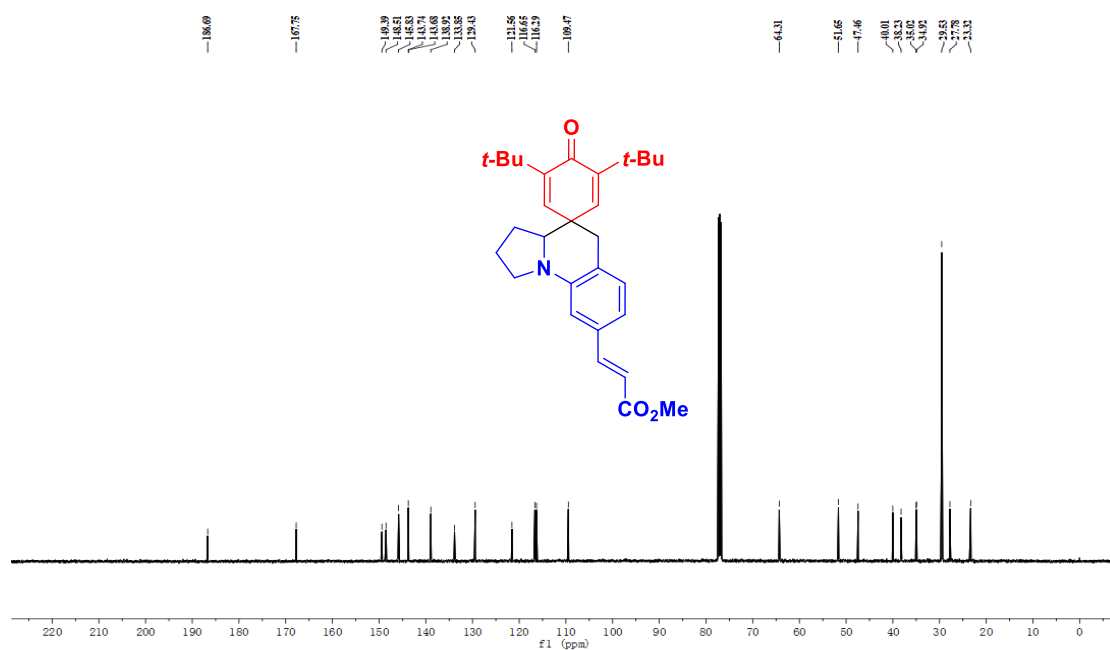

**3,5-di-*tert*-butyl-7'-chloro-1',2',3',3a'-tetrahydro-5'*H*-spiro[cyclohexane-1,4'-pyrrolo[1,2-*a*]quinoline]-2,5-dien-4-one (5e)**

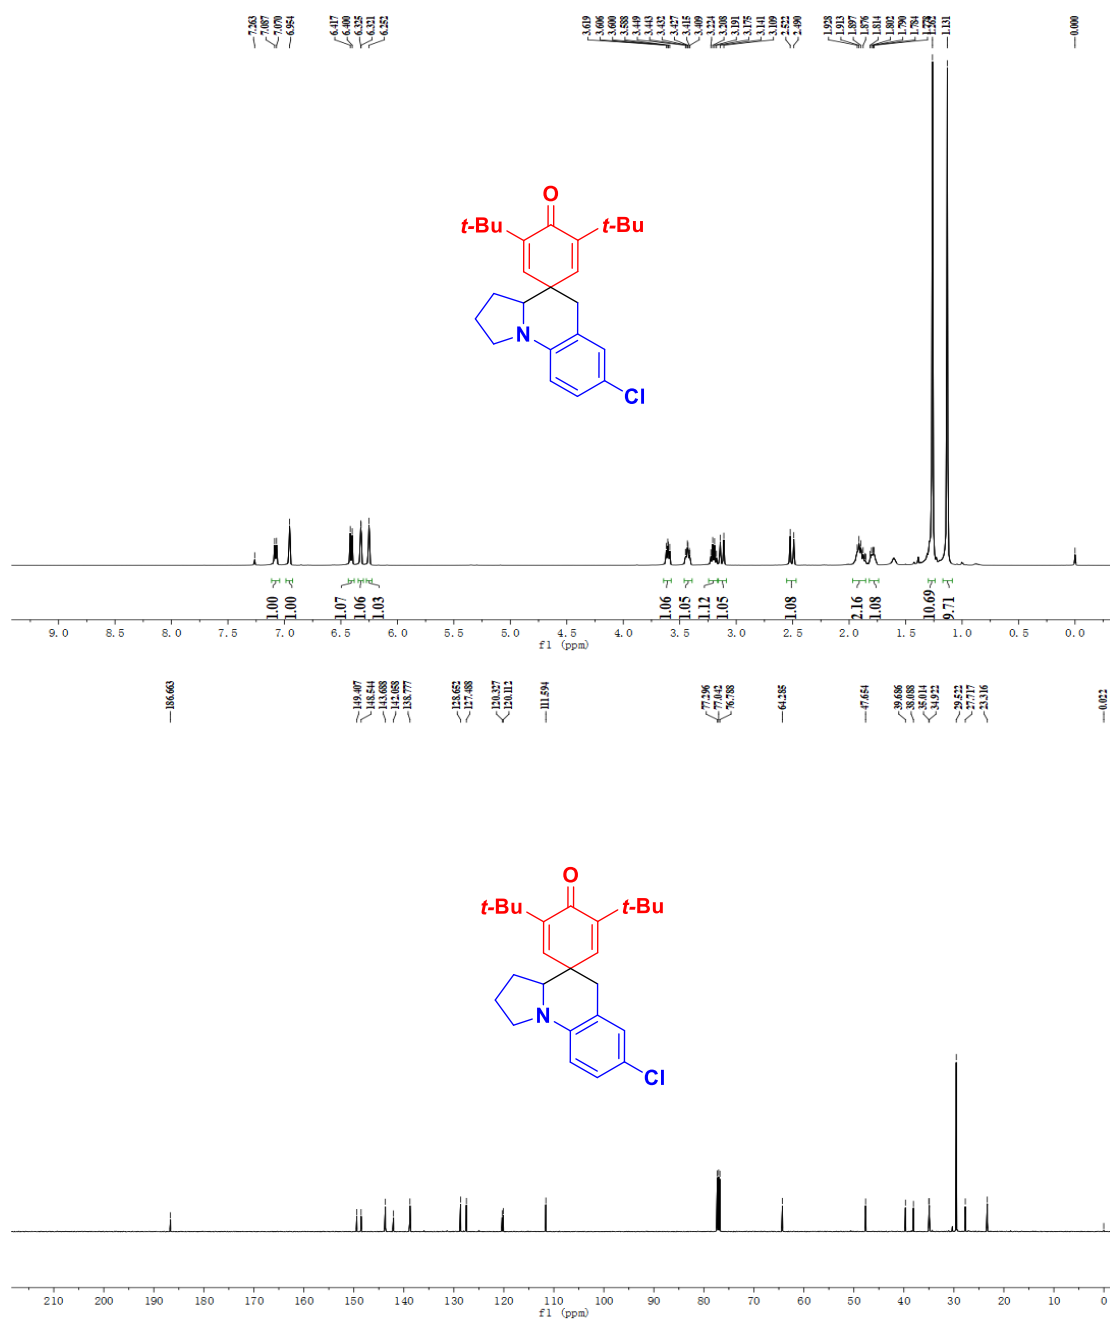

**6'-bromo-3,5-di-*tert*-butyl-1',2',3',3a'-tetrahydro-5'*H*-spiro[cyclohexane-1,4'-pyrrolo[1,2-*a*]quinoline]-2,5-dien-4-one (5f)**

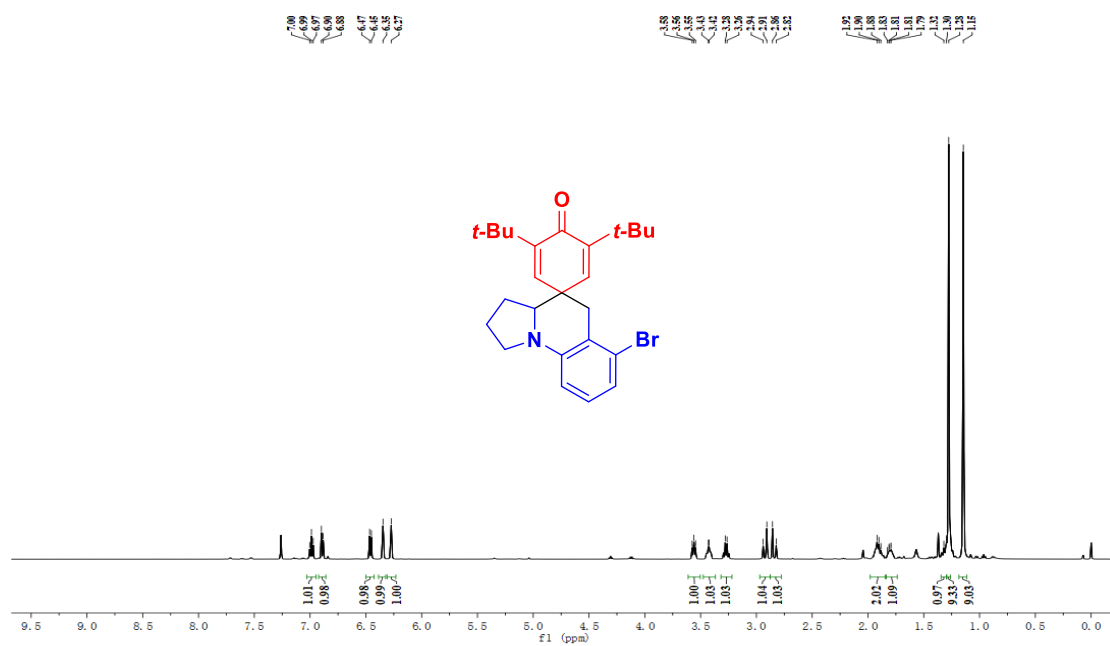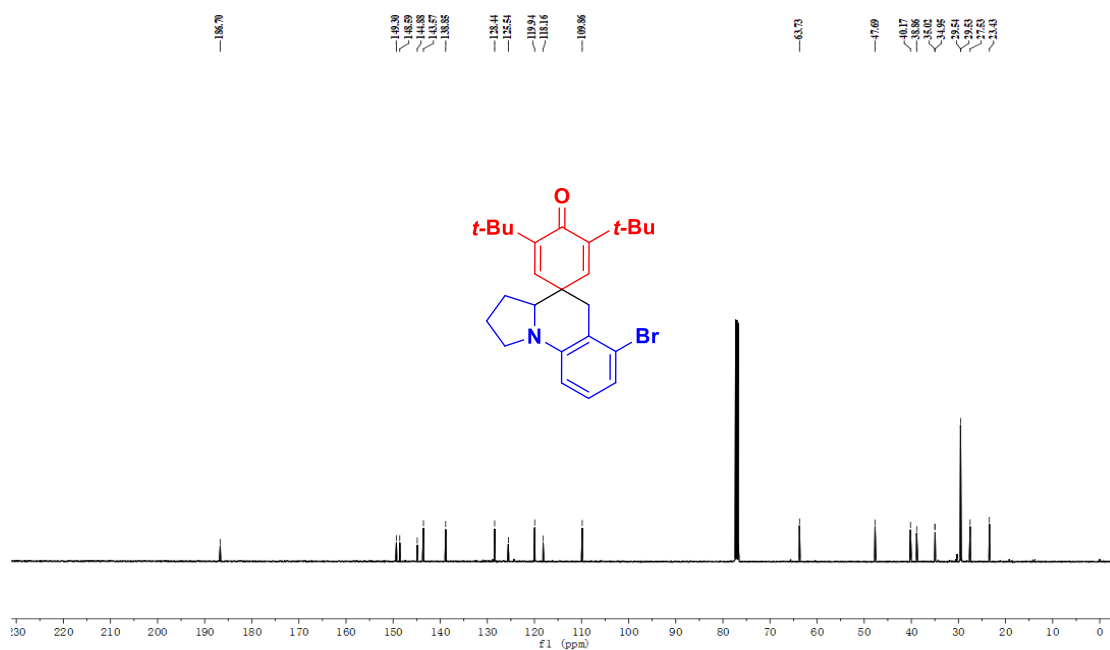

**3,5-di-*tert*-butyl-6*a*',6*b*',7',8',9',10',10*a*',11'-octahydro-5'*H*-spiro[cyclohexane-1,6'-isoindolo[2,1-*a*]quinoline]-2,5-dien-4-one (5g)**

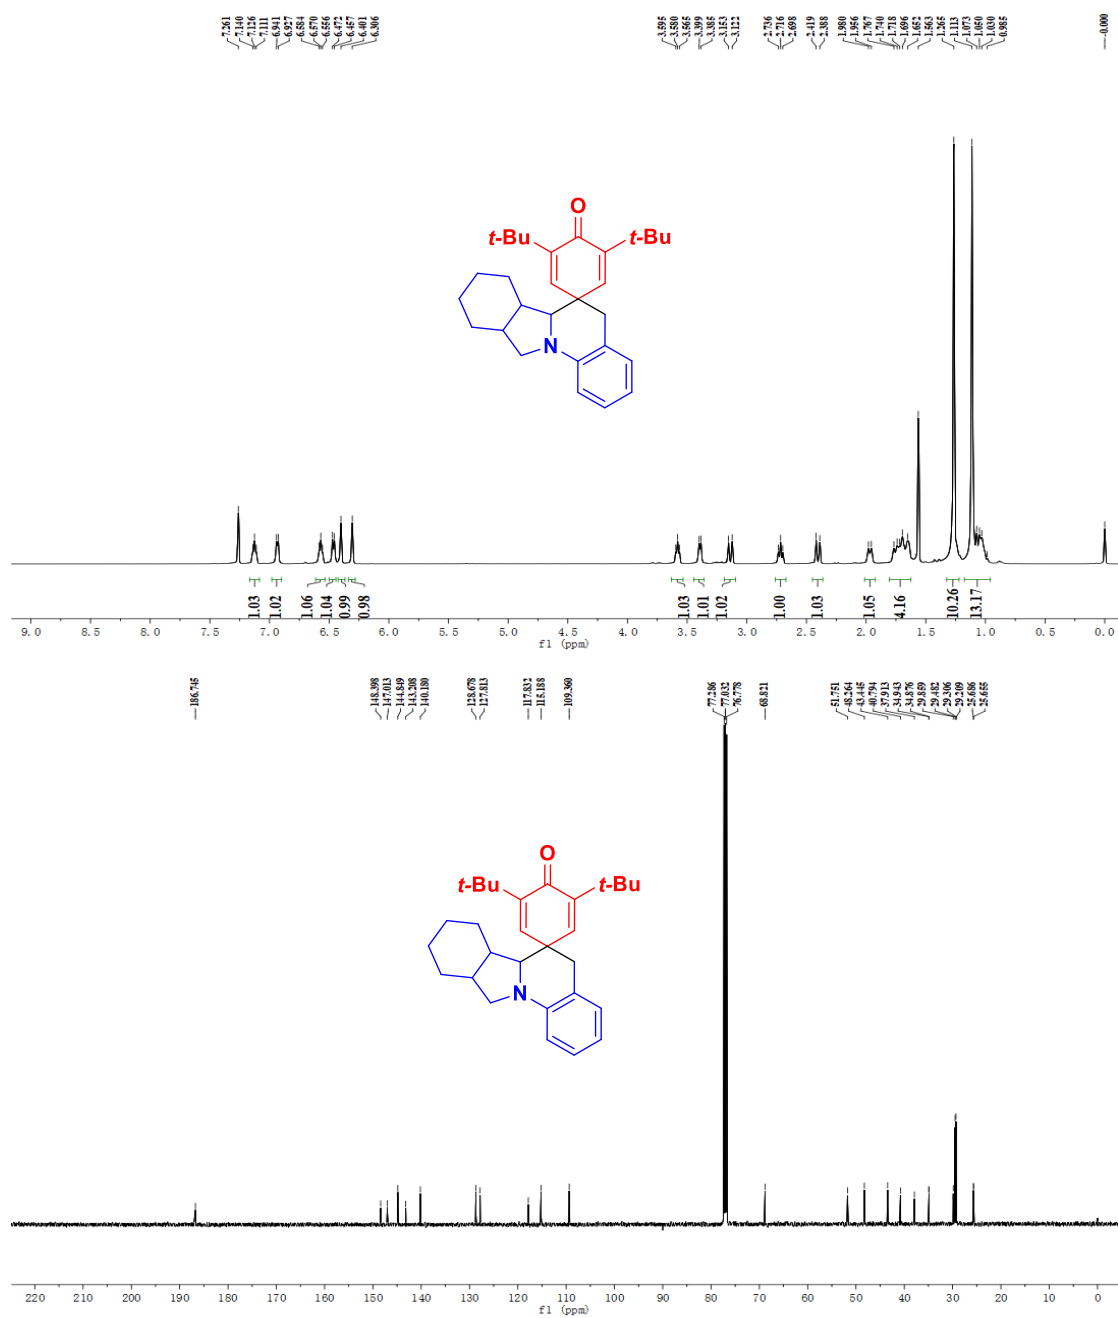

**3,5-di-*tert*-butyl-8a',9',10',11'-tetrahydro-7'H-spiro[cyclohexane-1,8'-naphtho[1,8-*ef*]pyrrolo[1,2-*a*]azepine]-2,5-dien-4-one (5h)**



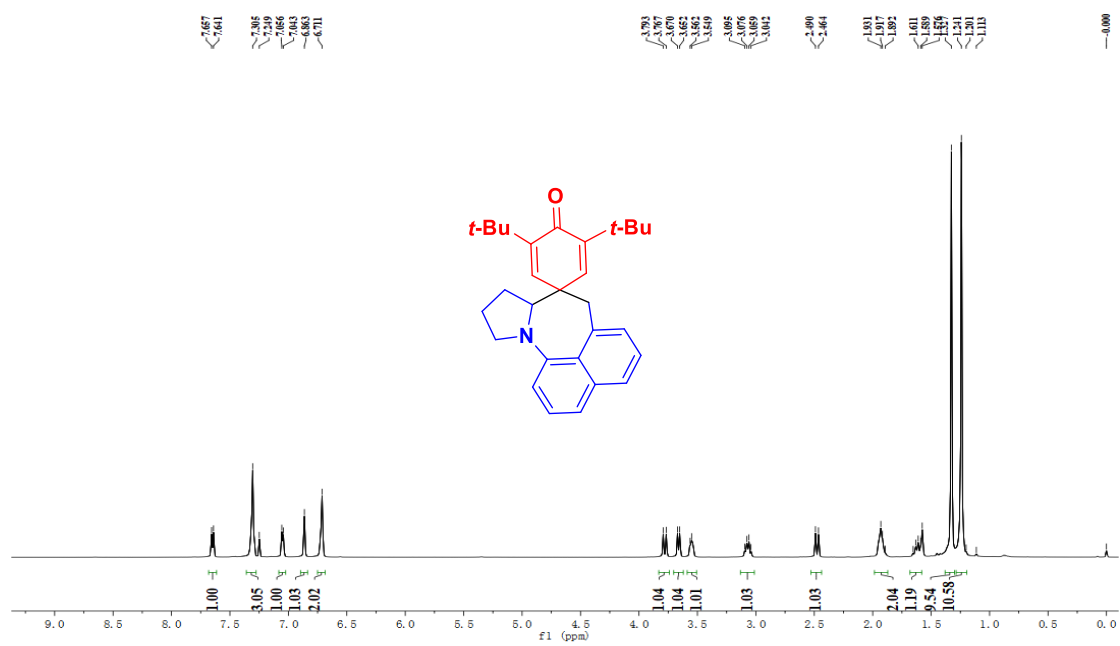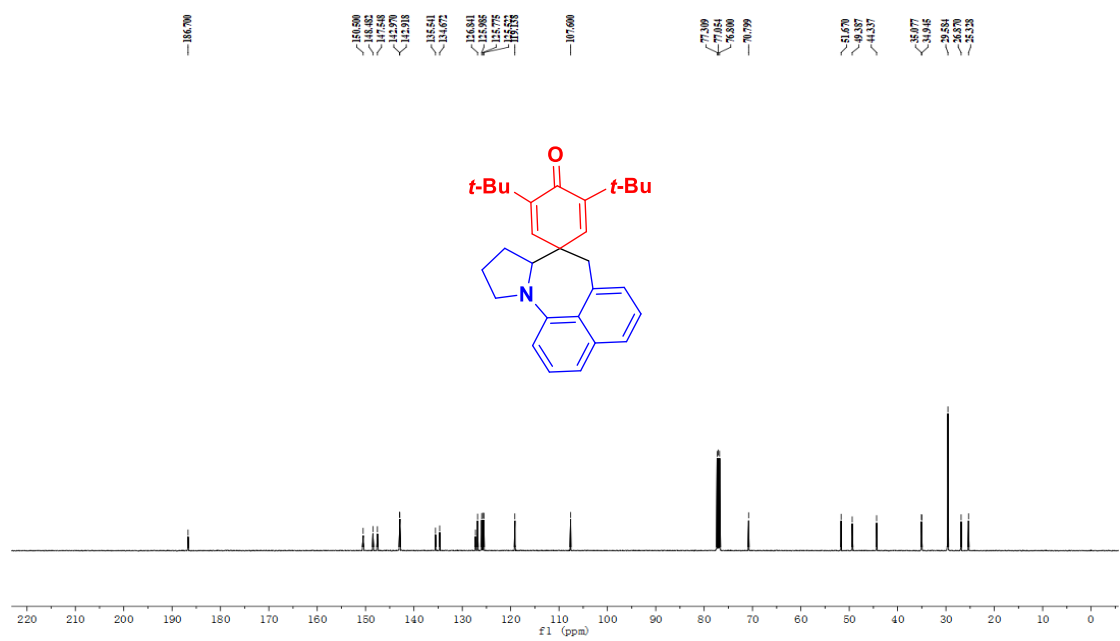

**1',2',3a,3',3a',4-hexahydro-5'H,6H-spiro[benzo[d][1,3]dioxole-5,4'-pyrrolo[1,2-a]quinolin]-6-one (6a)**

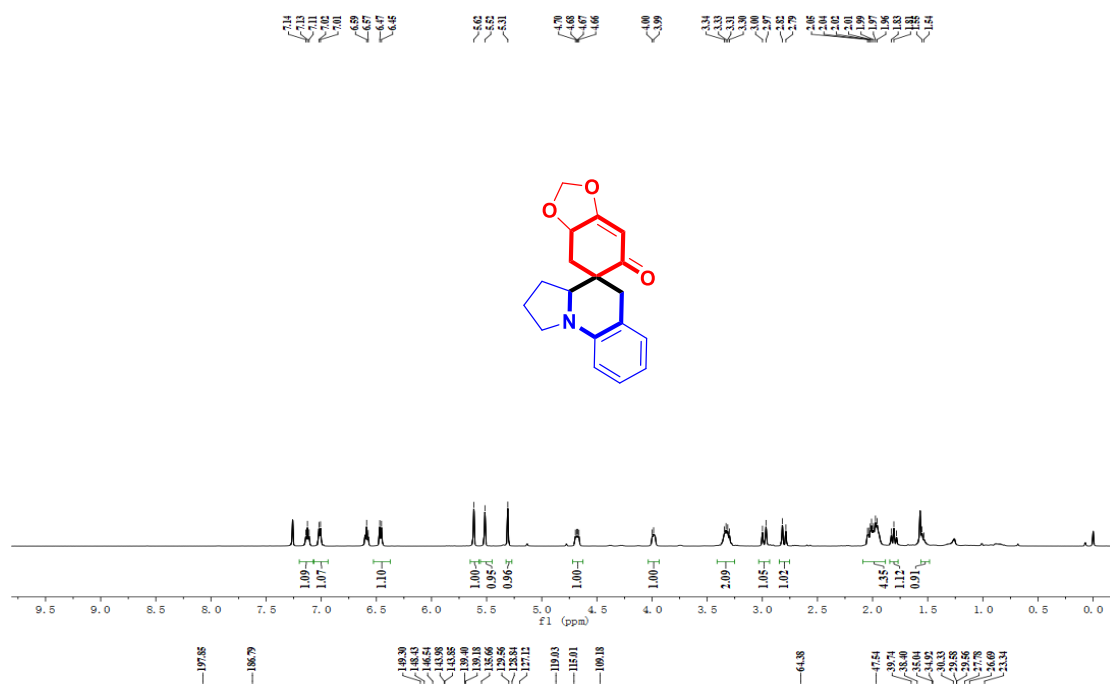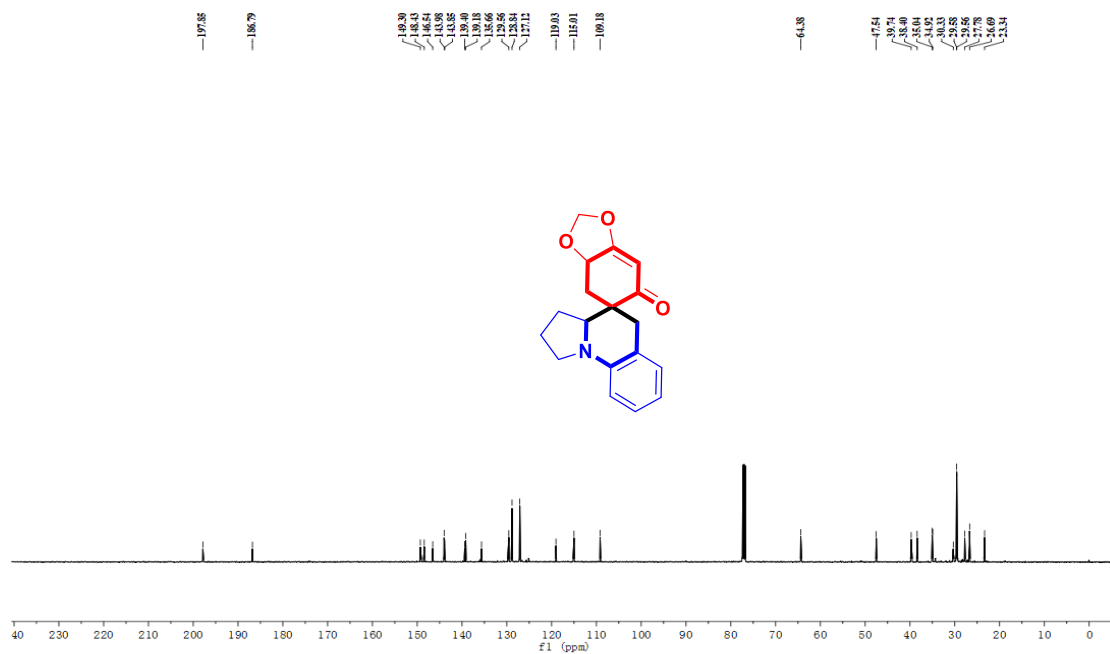

6-(2-(2-phenylpyrrolidin-1-yl)benzoyl)benzo[d][1,3]dioxol-5-ol (7a)

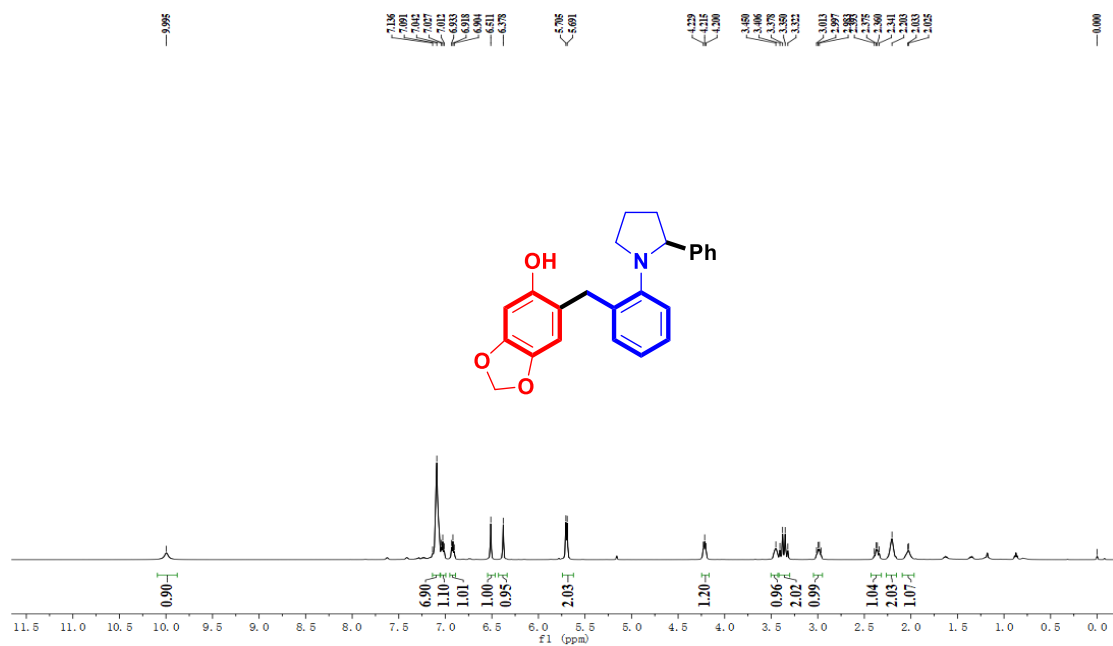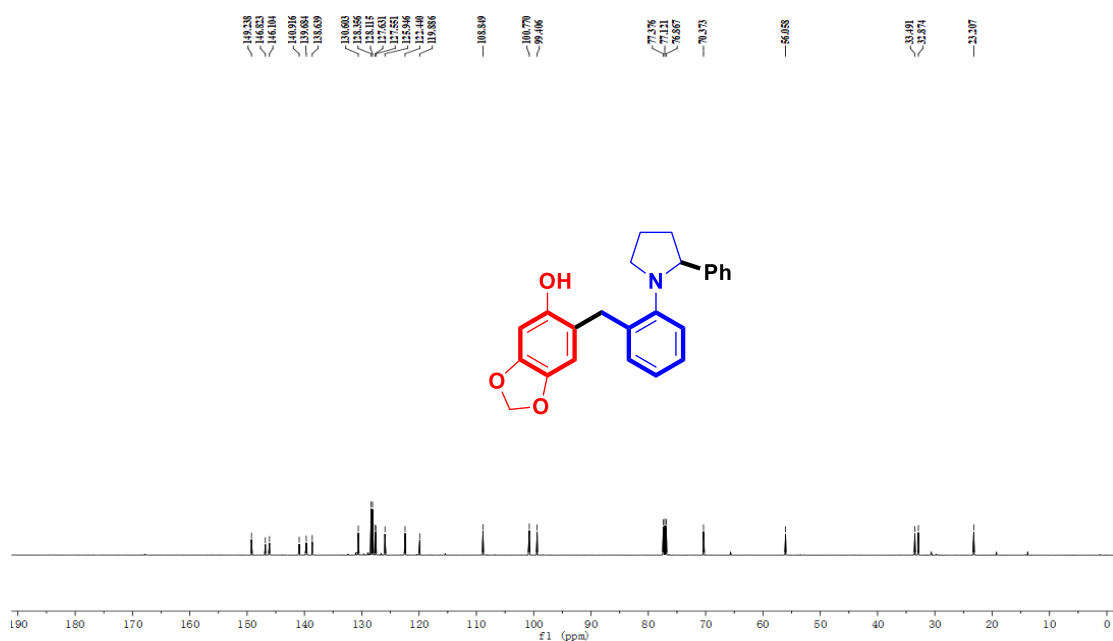

6-(2-(2-allylpyrrolidin-1-yl)benzyl)benzo[d][1,3]dioxol-5-ol (7b)

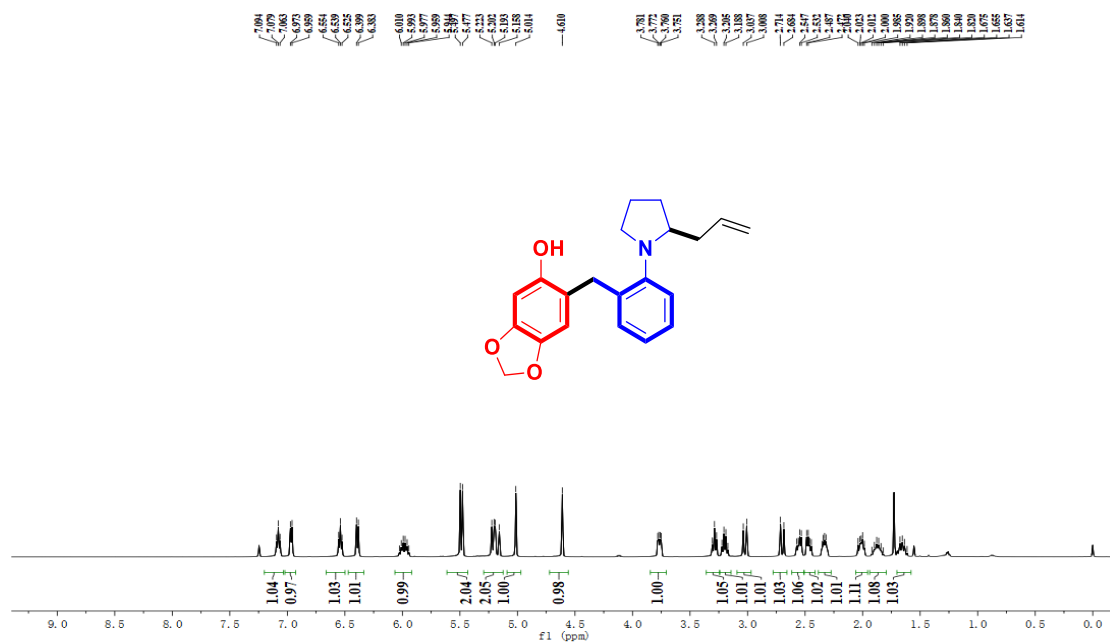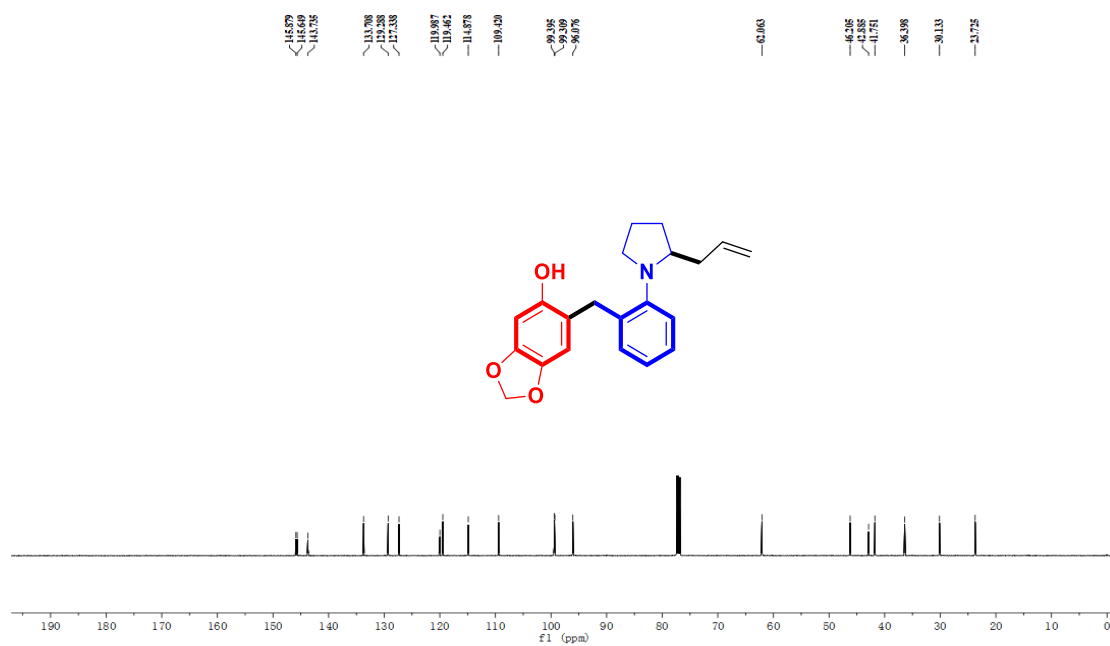

**6-(2-(2-vinylpyrrolidin-1-yl)benzyl)benzo[d][1,3]dioxol-5-ol (7c)**

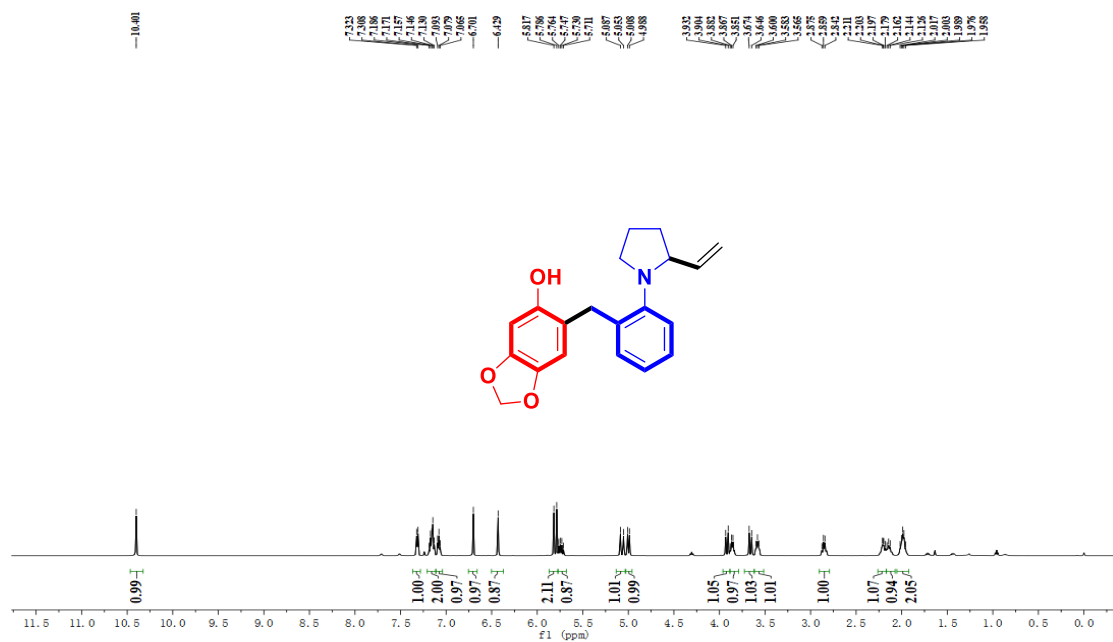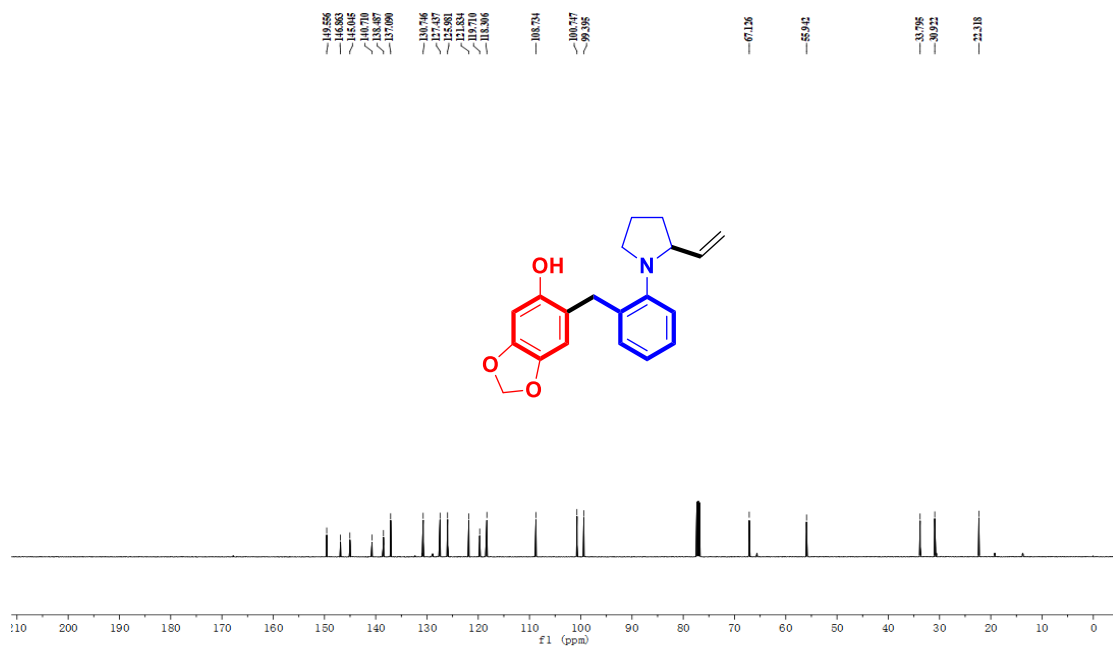

6-(2-(2-ethylpyrrolidin-1-yl)benzyl)benzo[d][1,3]dioxol-5-ol (7d)

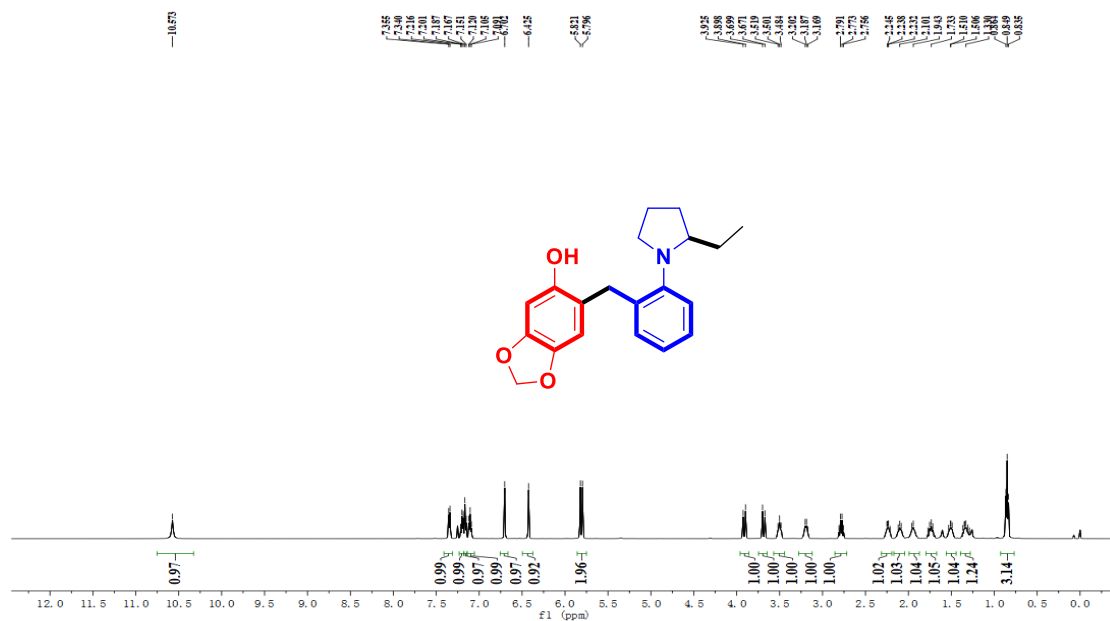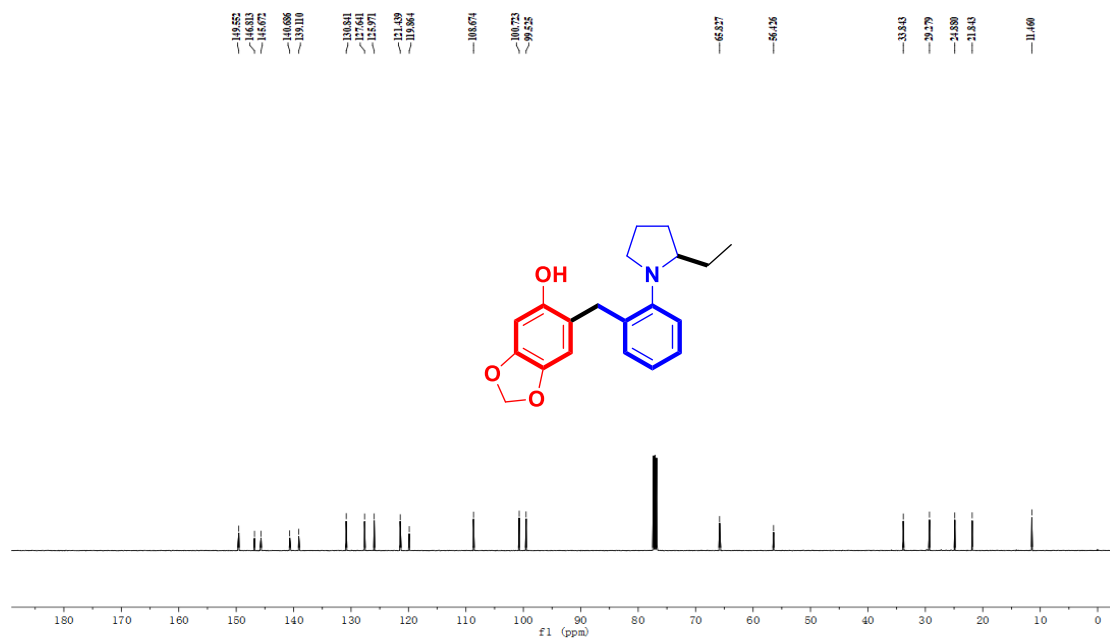

6-(2-(2-ethylpyrrolidin-1-yl)benzyl)benzo[d][1,3]dioxol-5-ol (7e)

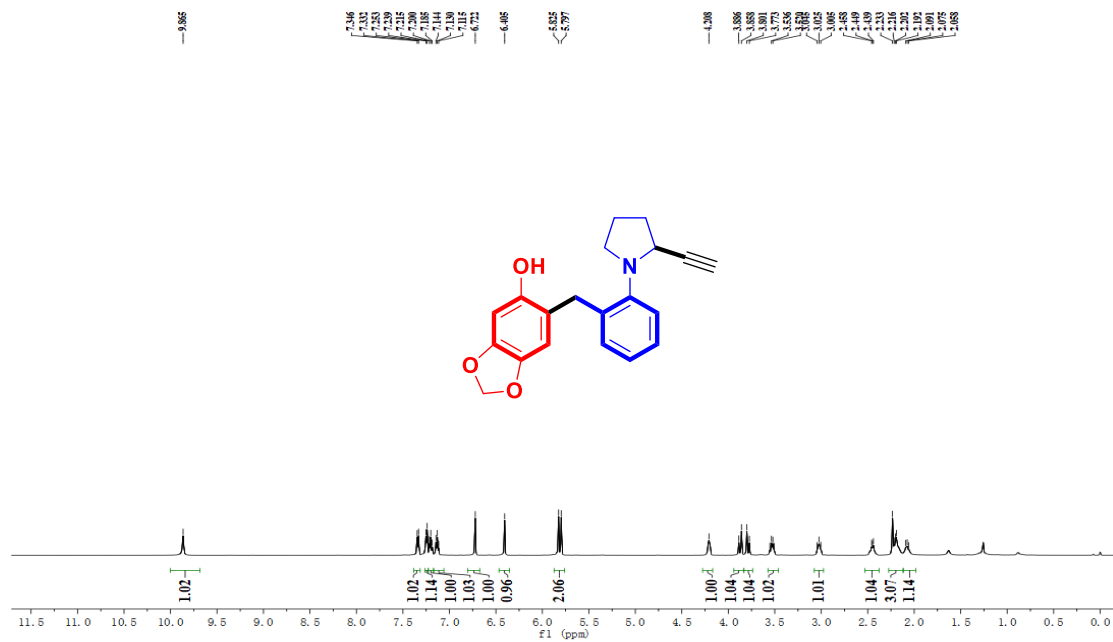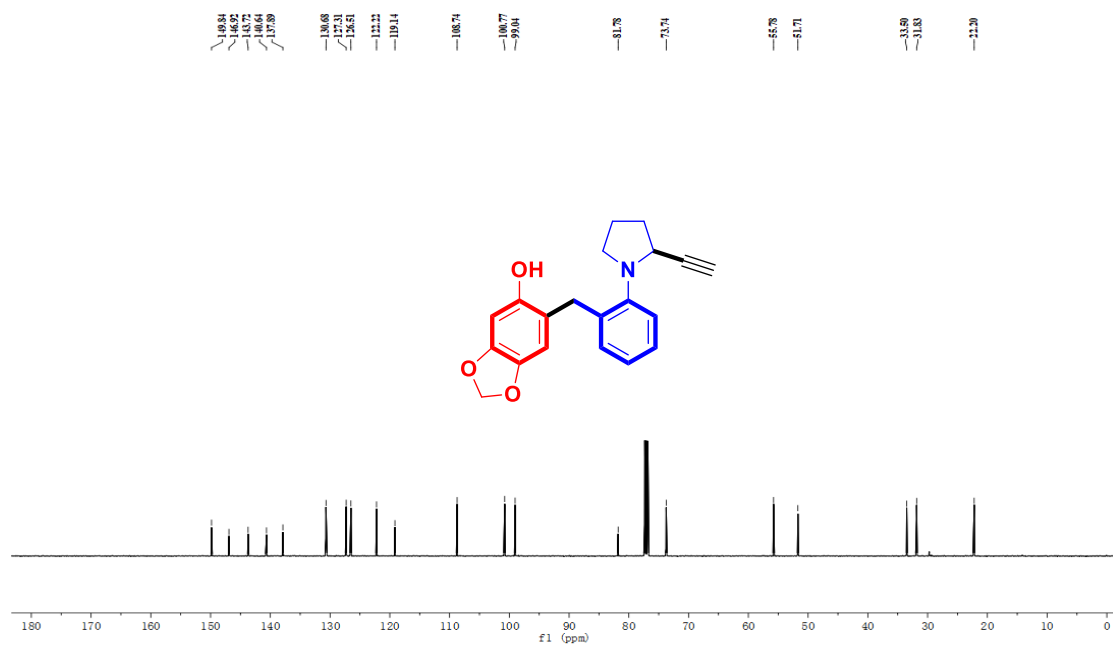

Supplement: SC-009-C8SC03339K-s001.pdf [file SC-009-C8SC03339K-s001.pdf]
